# Supplementary material for: The breath shape controls intonation of mouse vocalizations
Source: eLife. 2024 Jul 4;13:RP93079. doi: 10.7554/eLife.93079 (PMC11223766; doi:10.7554/eLife.93079)
Supplement: Figure 1—source data 1. [file elife-93079-fig1-data1.xlsx]

## Sheet: 1B
Breathing rate
Time bin (s)	5	10	15	20	25	30	35	40	45	50	55	60	65	70	75	80	85	90	95	100	105	110	115	120	125	130	135	140	145	150	155	160	165	170	175	180	185	190	195	200	205	210	215	220	225	230	235	240	245
Mouse 1	6.8	7.6	6	6.6	6.6	6.4	8	8.2	7	8	8.2	7.8	7.4	7.8	8	7.4	7.4	7.6	8.2	6.4	6.4	7.8	8.2	6.8	6.8	7.2	6.6	5.4	4.8	5.4	7.4	8.2	6.4	6.2	6.2	5.2	7.4	8	6.6	7.6	7	7.2	5.2	5.2	8.4	3.8	6.6	5.8	5.8
Mouse 2	2.2	2.2	2.6	2.6	2.6	2	3.4	2.4	3	2.4	2.4	2.6	2	2.2	2.6	2	2.6	2.2	2.2	2.4	2.4	5	7.6	6.4	7.2	5.8	6	5	4	4.4	5.8	6.4	6.8	7.2	4.8	8.2	4.8	7	7	5	4.4	4.8	7	6.6	6.4	7	9.4	8.8	8
Mouse 3	4.6	4.8	6	5.4	3.6	3.2	3.2	3.2	2.8	3.6	3.2	3.8	3.6	3.4	3.4	3	3	2.8	3	3.2	3.2	2.6	3	3	3	3.2	3.2	2.8	2.8	3.2	2.6	3.2	3.2	3.4	3.2	3.6	2.6	3.2	3	3	3	3.2	3	2.8	3	3	3	3.2	3
Mouse 4	5.8	6.2	7.8	3.6	4.2	4.6	5.4	3.6	6.2	5.4	6	5.6	7	8.2	6.4	6.6	3.6	7	6.8	5	6.2	6.6	6.8	6.6	5.8	5.4	5.4	5.4	5.4	4.8	5	5.4	5.6	5.2	4.8	4.6	6.4	4.2	4	6.2	6.4	6.8	3.8	3.2	4	6.6	6.2	5	6
Mouse 5	4.6	4.2	4.2	3.6	4.6	4.6	4.6	5.6	4.2	5.8	5	4.8	4.4	4	4.2	4.4	4.4	4.8	4.2	4.2	4.6	4.2	4.8	4.8	4.8	8.8	5.4	7.2	7.8	8.6	8.6	7.8	9.6	7.6	7.6	8.4	9	7	7.8	5.6	5.8	6.2	8	7.2	7.6	7.8	7	7.2	6.4
Mouse 6	3.2	4.6	5	4	4.2	4.6	3.8	4.2	4.2	4.4	3.8	4.2	5.2	5.6	4.2	5	4.8	4.8	3.8	5.8	5.4	5.8	5.8	5	6	5.6	6	6.4	5.8	6	5.6	5.6	5	5.6	6.8	6.8	5.2	4.8	4	4.2	4.2	4	4	4.2	3.8	3.6	4.8	4.2	4.2
USV rate
Mouse 1	0	0	0	0	0	0	0	0	0	0	0	0	0	0	0	0	0	0	0	0	0	0	0	0	0	0	0	0	0	0	0	0	0	0	0	0	0	0	0	0	0	0	0	0	0	0	0	0	0
Mouse 2	0	0	0	0	0	0	0	0	0	0	0	0	0	0	0	0	0	0	0	0	0	0	0	0	0	0	0	0	0	0	0	0	0	0	0	0	0	0	0	0	0	0	0	0	0	0.2	0.2	0	0
Mouse 3	0	0	0	0	0	0	0	0	0	0	0	0	0	0	0	0	0	0	0	0	0	0	0	0	0	0	0	0	0	0	0	0	0	0	0	0	0	0	0	0	0	0	0	0	0	0	0	0	0
Mouse 4	0	0	0	0	0	0	0	0	0	0	0	0	0	0	0	0	0	0	0	0	0	0	0	0	0	0	0	0	0	0	0	0	0	0	0	0	0	0	0	0	0	0	0	0	0	0	0	0	0
Mouse 5	0	0	0	0	0	0	0	0	0	0	0	0	0	0	0	0	0	0	0	0	0	0	0	0	0	0	0	0	0	0	0	0	0	0	0	0	0	0	0	0	0	0	0	0	0	0	0	0	0
Mouse 6	0	0	0	0	0	0	0	0	0	0	0	0	0	0	0	0	0	0	0	0	0	0	0	0	0	0	0	0	0	0	0	0	0	0	0	0	0	0	0	0	0	0	0	0	0	0	0	0	0
[truncated: 191 more columns]

## Sheet: 1C
No USV
Frequency bin (Hz)	0.5	1	1.5	2	2.5	3	3.5	4	4.5	5	5.5	6	6.5	7	7.5	8	8.5	9	9.5	10	10.5	11	11.5	12	12.5	13	13.5	14	14.5	15	15.5	16	16.5	17	17.5	18	18.5	19	19.5	20
Mouse 1	0	0	0.000931966	0.00745573	0.0121156	0.0232992	0.0242311	0.0382106	0.0400746	0.0447344	0.0661696	0.0671016	0.0745573	0.0587139	0.054986	0.0615098	0.0745573	0.0661696	0.0521901	0.0596459	0.055918	0.0391426	0.027027	0.0167754	0.0121156	0.0055918	0.00186393	0.00372787	0.000931966	0	0.000931966	0.000931966	0	0.0027959	0	0.000931966	0	0	0	0.00186393
Mouse 2	0	0.000786164	0.000786164	0.00471698	0.00943396	0.00786164	0.00786164	0.0110063	0.0227987	0.0165094	0.0259434	0.0227987	0.0267296	0.0416667	0.0495283	0.0408805	0.0738994	0.0566038	0.0951258	0.0856918	0.0927673	0.0888365	0.0778302	0.0518868	0.0448113	0.0290881	0.0086478	0.00393082	0.000786164	0	0	0	0	0.000786164	0	0	0	0	0	0
Mouse 3	0	0	0.000706215	0	0.00353107	0.00282486	0.0112994	0.0169492	0.0169492	0.029661	0.0282486	0.0310734	0.0317797	0.0317797	0.0317797	0.045904	0.069209	0.0607345	0.0783898	0.0826271	0.117938	0.105226	0.065678	0.0600282	0.0211864	0.0247175	0.00635593	0.00423729	0.00353107	0.00282486	0.00282486	0	0.000706215	0.000706215	0.000706215	0	0	0	0	0.00141243
Mouse 4	0	0	0.000766284	0.00766284	0.0314176	0.0321839	0.0413793	0.0237548	0.0229885	0.0237548	0.0260536	0.0329502	0.0298851	0.0306513	0.0283525	0.0413793	0.056705	0.0521073	0.067433	0.0789272	0.0773946	0.0996169	0.067433	0.0467433	0.0306513	0.0291188	0.00842912	0.0045977	0.00306513	0.00306513	0	0	0	0.000766284	0	0	0	0	0	0
Mouse 5	0	0	0.00149813	0.00898876	0.0134831	0.011985	0.0172285	0.0149813	0.0224719	0.0187266	0.0172285	0.0247191	0.0299625	0.0374532	0.0382022	0.0419476	0.0546816	0.0554307	0.0898876	0.0921348	0.0808989	0.101873	0.0756554	0.0479401	0.0374532	0.035206	0.011985	0.00749064	0.00674157	0.000749064	0	0.000749064	0.00149813	0.000749064	0	0	0	0	0	0
Mouse 6	0	0	0.00143575	0.00358938	0.017229	0.051687	0.0875808	0.10122	0.111989	0.111271	0.144293	0.107681	0.0524049	0.0373295	0.0315865	0.0186648	0.0279971	0.0186648	0.017229	0.0129218	0.0129218	0.0086145	0.00502513	0.005743	0.00143575	0.00358938	0.00143575	0.000717875	0.0028715	0	0.000717875	0	0	0.000717875	0.000717875	0	0	0	0	0.000717875
USV
Mouse 1	0	0	0	0	0.00943396	0	0.00943396	0.0141509	0.0518868	0.0707547	0.0754717	0.0518868	0.103774	0.0660377	0.108491	0.0518868	0.0707547	0.0707547	0.0849057	0.0660377	0.0424528	0.0141509	0.00471698	0.0188679	0	0.00471698	0	0	0	0	0	0	0.00471698	0.00471698	0	0	0	0	0	0
Mouse 2	0	0	0	0.00350877	0.00701754	0.00350877	0.00701754	0.0245614	0.0175439	0.0315789	0.0596491	0.0666667	0.045614	0.0526316	0.0807018	0.0561404	0.0982456	0.077193	0.0912281	0.0736842	0.0631579	0.0631579	0.045614	0.0245614	0.00350877	0	0	0.00350877	0	0	0	0	0	0	0	0	0	0	0	0
Mouse 3	0	0	0	0	0	0	0.0112994	0.0225989	0.118644	0.0564972	0.0903955	0.0564972	0.0847458	0.079096	0.079096	0.0677966	0.0734463	0.0564972	0.0282486	0.0621469	0.0282486	0.0225989	0.039548	0.00564972	0	0.00564972	0.00564972	0	0.00564972	0	0	0	0	0	0	0	0	0	0	0
Mouse 4	0	0	0	0	0	0	0	0.0208333	0.125	0.0625	0	0.0833333	0.0833333	0.104167	0.0416667	0.0625	0.0416667	0.104167	0.104167	0.0833333	0.0416667	0.0208333	0	0.0208333	0	0	0	0	0	0	0	0	0	0	0	0	0	0	0	0
Mouse 5	0	0	0	0	0	0.00961538	0.0144231	0	0.0192308	0.00480769	0.0576923	0.0336538	0.0576923	0.0480769	0.0576923	0.0480769	0.0961538	0.100962	0.115385	0.129808	0.0721154	0.0721154	0.0432692	0.00480769	0.00480769	0.00480769	0	0	0.00480769	0	0	0	0	0	0	0	0	0	0	0
Mouse 6	0	0	0	0	0	0.00591716	0.0532544	0.0591716	0.0769231	0.0769231	0.0591716	0.118343	0.0473373	0.0828402	0.0769231	0.0236686	0.0887574	0.0473373	0.0650888	0.035503	0.0177515	0.0177515	0.0414201	0	0	0.00591716	0	0	0	0	0	0	0	0	0	0	0	0	0	0
	Instantaneous Freq
	USV	No USV
Mouse1	7.338	7.4303
Mouse2	7.9833	9.0039
Mouse3	7.0994	9.499
Mouse4	7.2646	8.414
Mouse5	8.395	8.9689
Mouse6	6.6947	9.7936
Mean	7.4625	8.85162
STD	0.619163	0.843212
SEM	0.131145	0.153044
Paired t-test	0.0305183

## Sheet: 1D
	Ti		Te		Ratio
	USV	No USV	USV	No USV	USV	No USV
Mouse1	42.8491	44.0764	107.863	115.388	0.3534	0.297
Mouse2	36.7.018	36.1423	102.26	90.9049	0.3028	0.277
Mouse3	42.9944	36.5558	112.944	85.4873	0.3425	0.3487
Mouse4	40.2292	42.4628	110.938	107.909	0.3223	0.2937
Mouse5	37.4712	38.1318	91.3894	94.033	0.3505	0.2753
Mouse6	46.0296	40.8927	122.124	76.2906	0.335813	0.380521

## Sheet: 1E
	Pif		Pef
	USV	No USV	USV	No USV
Mouse1	-0.046	-0.0401	0.0265	0.0215
Mouse2	-0.0461	-0.0426	0.0231	0.0215
Mouse3	-0.0454	-0.0441	0.0268	0.0235
Mouse4	-0.0408	-0.037	0.0201	0.0206
Mouse5	-0.051	-0.0439	0.0278	0.0224
Mouse6	-0.0538895	-0.0526818	0.0310843	0.0350444

## Sheet: 1F
	UFM	FLAT	STEP DOWN	SHORT	COMPLEX	CHEV	TWO STEP	DFM	STEP UP	MULTI STEP
Mouse 1	0.196676	0.155125	0.199446	0.177285	0.077562	0.036011	0.33241	0.047091	0.038781	0.038781
Mouse 2	0.357143	0.24216	0.109756	0.108014	0.080139	0.054007	0.22648	0.003484	0.017422	0.005226
Mouse 3	0.371084	0.122892	0.113253	0.050602	0.098795	0.06747	0.062651	0.045783	0.016867	0.050602
Mouse 4	0.486486	0.148649	0.027027	0.067568	0.027027	0.121622	0.027027	0	0.094595	0
Mouse 5	0.246696	0.185022	0.387665	0.044053	0.061674	0.044053	0.013216	0	0	0.017621
Mouse 6	0.336683	0.190955	0.105528	0.030151	0.170854	0.040201	0.025126	0.01005	0.01005	0.080402
