# Supplementary material for: The breath shape controls intonation of mouse vocalizations
Source: eLife. 2024 Jul 4;13:RP93079. doi: 10.7554/eLife.93079 (PMC11223766; doi:10.7554/eLife.93079)
Supplement: Figure 2—source data 1. [file elife-93079-fig2-data1.xlsx]

## Sheet: Pitch shuffled
	ufm	step down	flat	short	complex	chevron	twostep	multi	step up	dfm
	0.0804039	-0.139702	0.0878453	0.320575	-0.0777214	0.0227776	0.0141447	0.121591	-0.0244212	0.0669913
	-0.0655745	0.0713772	0.0081825	-0.302311	0.0897442	-0.0534897	-0.0984199	-0.0441211	-0.0361348	0.0734871
	-0.183866	-0.102854	-0.25836	-0.0220808	0.126537	0.0945592	-0.212495	-0.0804161	-0.0549911	-0.0182444
	0.217704	-0.0403836	0.0234341	-0.080975	-0.0129346	0.127967	0.0963098	0.157563	-0.00196481	-0.0569544
	-0.00387366	0.256728	0.299845	0.470389	0.0736448	-0.145208	0.0771453	0.00535614	0.0683067	-0.0182465
	0.0387518	-0.243889	0.226099	-0.452415	-0.0117519	0.203726	-0.164937	-0.0709468	-0.0254249	0.0458852
	0.00124218	-0.171919	0.242279	-0.0769361	0.0961331	0.204373	0.11521	-0.0459333	0.0719831	0.0230467
	-0.116621	0.0771517	-0.00302101	-0.134556	-0.0573909	0.0382285	-0.0113563	0.00241959	-0.0869136	0.0700122
	-0.0693474	-0.205669	-0.0737528	0.471785	0.0758459	0.503439	0.0382874	0.0260091	0.114116	-0.144484
	-0.0952855	-0.0547352	0.147596	-0.151225	0.192705	0.0529331	0.0782998	-0.0585001	-0.034619	0.182025
	0.0206989	0.103121	-0.133928	0.123754	0.0770338	0.0491734	0.255961	0.0460462	-0.0983518	-0.0655093
	0.0445917	0.0369588	-0.224681	-0.318792	-0.0468792	0.0614167	0.0482348	-0.131448	-0.126054	-0.088363
	-0.0793589	-0.165581	-0.0816873	-0.612423	-0.10838	0.132269	0.0451446	-0.16952	0.0662513	-0.316609
	0.200678	0.166159	-0.172569	0.35406	-0.0222453	-0.0175516	0.00218775	-0.00130296	-0.0365078	0.114316
	0.462411	-0.138478	-0.0350977	-0.216222	-0.0267843	-0.158184	0.181247	-0.105352	0.00421187	0.18711
	-0.100047	0.0201307	0.137309	-0.32917	0.0782835	0.263904	0.201474	0.023593	0.0158337	-0.130432
	-0.231807	-0.123238	0.147634	0.25379	-0.138097	-0.0300196	-0.00856279	-0.0061232	0.110077	-0.0982719
	0.296433	-0.198928	0.100223	0.277367	0.157189	0.0878681	0.00248475	-0.116403	-0.012246	-0.0351435
	-0.205752	-0.198246	0.129114	0.38661	-0.0316093	0.0927403	-0.0228917	-0.079035	0.0167246	0.0842895
	0.16416	-0.0160302	0.01166	0.152252	-0.0461978	0.083157	-0.366125	0.00955933	0.413577	-0.126775
	-0.178468	-0.0345558	0.208201	-0.374943	0.0929804	-0.040829	-0.162823	0.0735122	-0.00396793	-0.056051
	0.00796306	-0.47024	-0.11524	-0.419521	-0.0271448	-0.0877497	0.100849	0.0115422	-0.0349706	0.0616713
	0.0255319	0.0341802	0.122312	0.000795889	0.0925008	0.0814001	-0.0595755	-0.0444634	-0.113883	-0.0357349
	0.274552	-0.182436	-0.0118578	0.189096	-0.0381932	-0.049159	NaN	-0.0583711	-0.198341	0.23288
	0.167796	0.160288	0.053674	0.153643	0.133283	0.0703227	NaN	0.0533362	0.0772665	-0.0626712
	0.11713	0.148095	-0.0806206	-0.101673	-0.051364	0.0466321	NaN	-0.0733876	-0.0815028	-0.0275722
	0.0186024	0.050411	-0.304501	0.352485	0.0438052	0.0833001	NaN	0.126433	-0.128093	-0.132859
	0.0651785	-0.096871	0.0751392	-0.170243	-0.0424627	0.0156407	NaN	0.0797483	-0.0553501	0.203498
	0.124904	0.213271	0.0946679	0.186224	0.14452	-0.0724691	NaN	-0.00783637	0.00940093	-0.0675389
	-0.0448845	0.134571	-0.356492	0.028064	-0.0420368	0.182048	NaN	-0.0636772	-0.120781	0.0357585
	-0.375672	-0.439031	-0.20124	-0.0853811	-0.0432226	-0.0674825	NaN	-0.0193378	0.103203	0.301321
	0.101057	-0.0641316	-0.184061	-0.0441231	-0.0228503	0.14862	NaN	0.0306007	-0.193625	-0.110976
	0.281039	-0.0250162	0.151921	-0.129619	0.0446879	-0.0367724	NaN	NaN	-0.0514203	-0.0167776
	-0.130554	-0.02841	0.00496116	-0.208223	-0.00292395	-0.00890343	NaN	NaN	0.0304793	0.0471677
	0.272138	0.280322	0.145948	-0.00499552	-0.0104407	-0.176288	NaN	NaN	0.025046	-0.0960427
	-0.0607247	-0.115984	-0.137159	-0.101513	0.0175471	-0.106772	NaN	NaN	-0.00527666	-0.126301
	0.0238635	-0.219758	0.0270528	-0.268573	0.0186682	-0.060045	NaN	NaN	-0.00130815	-0.128972
	0.0544529	0.0202626	0.13149	-0.0485379	-0.0763992	-0.0999249	NaN	NaN	-0.0444074	-0.00990138
	0.110735	-0.111525	-0.0807912	-0.0343446	-0.00512418	-0.00429925	NaN	NaN	-0.0183996	-0.106434
	-0.0684197	-0.0358035	-0.211593	0.233337	-0.085527	-0.0119303	NaN	NaN	-0.0219825	0.136343
	-0.00854988	0.109876	-0.027668	-0.0847742	0.0254125	0.0187519	NaN	NaN	0.138216	0.00477132
	0.0870414	-0.113853	0.115967	0.0345177	-0.0178525	0.213474	NaN	NaN	-0.190847	-0.00683353
	-0.438968	-0.0400402	-0.0770652	0.06703	0.0517009	0.00125294	NaN	NaN	-0.0940895	-0.0847907
	0.630466	-0.209572	0.191158	0.705278	0.0330319	-0.153727	NaN	NaN	0.080801	0.135214
	0.0355522	-0.189077	-0.252383	-0.0119409	-0.0771246	0.0886546	NaN	NaN	-0.0354467	-0.0162715
	-0.184989	-0.0935931	-0.189914	0.144697	0.161495	-0.102635	NaN	NaN	0.0446941	-0.0536411
	0.199051	-0.0019972	-0.19302	0.388026	-0.0374387	0.134171	NaN	NaN	0.0149715	-0.198908
	-0.13078	0.108061	-0.0429687	0.139634	-0.107794	0.136237	NaN	NaN	-0.124105	0.0473851
	-0.125717	-0.0139432	-0.0874836	0.528918	0.108036	-0.0889721	NaN	NaN	-0.143149	0.122431
	-0.00257091	0.106622	-0.0474602	-0.0121597	-0.0135302	-0.0376407	NaN	NaN	0.0846754	0.0303319
	-0.0497098	0.106306	0.0885457	-0.667534	0.0228013	-0.111597	NaN	NaN	NaN	-0.00255056
	0.113194	0.0325548	0.136792	-0.00960316	-0.0182808	0.0999731	NaN	NaN	NaN	NaN
	0.0183692	-0.0258369	-0.168811	-0.131931	0.03291	0.10943	NaN	NaN	NaN	-0.179996
	-0.000544136	0.0632493	-0.155074	-0.562776	0.0387003	-0.132154	NaN	NaN	NaN	NaN
	0.0424624	-0.143859	0.0939697	0.073709	-0.0592471	0.224498	NaN	NaN	NaN	NaN
	0.241758	-0.0529421	0.0748484	-0.0535578	-0.121552	-0.000807279	NaN	NaN	NaN	NaN
	-0.477089	-0.0842415	-0.136749	0.0213498	0.0493684	0.0344575	NaN	NaN	NaN	NaN
	0.064452	-0.26892	-0.573263	-0.207931	0.0139116	-0.11239	NaN	NaN	NaN	NaN
	0.0473536	-0.0840056	-0.0624066	0.1914	0.0341022	-0.0804452	NaN	NaN	NaN	NaN
	-0.188092	-0.105999	0.207186	0.308009	-0.0568063	-0.102503	NaN	NaN	NaN	NaN
	-0.00217425	-0.0281723	-0.06299	-0.310634	-0.0631533	0.115781	NaN	NaN	NaN	NaN
	-0.0158341	0.112016	0.0665253	-0.324995	0.0447056	-0.04529	NaN	NaN	NaN	NaN
	-0.368215	0.0104269	0.0197615	0.316983	0.0515373	0.00382045	NaN	NaN	NaN	NaN
	-0.0315205	-0.0917838	0.0205071	-0.66065	-0.0014366	0.117506	NaN	NaN	NaN	NaN
	-0.0352795	0.210854	-0.234831	0.341668	0.0856148	0.10006	NaN	NaN	NaN	NaN
	-0.206605	0.00144459	0.285652	0.210299	-0.0517326	0.0210626	NaN	NaN	NaN	NaN
	0.0641708	0.261688	0.0839102	-0.116748	0.0488886	0.0632275	NaN	NaN	NaN	NaN
	0.00454357	-0.0403756	0.0559251	0.250035	-0.0206036	-0.0919921	NaN	NaN	NaN	NaN
	-0.0602745	-0.0788978	0.0429451	-0.317703	0.0581691	0.116866	NaN	NaN	NaN	NaN
	0.167066	0.071364	-0.0736458	0.223006	-0.0152819	-0.0220056	NaN	NaN	NaN	NaN
	0.0754112	-0.0482285	-0.081153	0.127125	-0.0385522	0.0477328	NaN	NaN	NaN	NaN
	-0.075158	-0.0498906	0.0698876	0.267377	0.0116296	-0.182853	NaN	NaN	NaN	NaN
	0.10124	0.0178469	-0.34284	0.603433	-0.0380424	0.068354	NaN	NaN	NaN	NaN
	-0.274319	0.0283772	0.153706	0.429726	-0.114907	-0.0700457	NaN	NaN	NaN	NaN
	-0.195307	-0.0630066	0.0664667	0.505257	-0.0424382	-0.0960253	NaN	NaN	NaN	NaN
	-0.0975523	0.124613	0.187174	-0.190037	0.089706	0.0704178	NaN	NaN	NaN	NaN
	-0.145402	-0.00147973	0.278118	0.126569	-0.029178	-0.0754488	NaN	NaN	NaN	NaN
	-0.17301	0.144514	0.267967	-0.517202	-0.0562496	0.111655	NaN	NaN	NaN	NaN
	-0.0255961	-0.0277395	0.0211864	0.210539	-0.0199056	0.202519	NaN	NaN	NaN	NaN
	-0.117467	0.0885168	-0.15061	-0.471408	-0.0181558	-0.201046	NaN	NaN	NaN	NaN
	0.089391	0.144854	0.0856752	0.260074	-0.0580953	0.0146414	NaN	NaN	NaN	NaN
	-0.0824267	-0.182685	0.106332	0.442438	0.0916018	0.0671679	NaN	NaN	NaN	NaN
	0.177618	0.0152585	-0.175992	-0.100269	0.0427156	0.191341	NaN	NaN	NaN	NaN
	0.00853048	0.121491	-0.203389	0.288724	-0.0295553	-0.0874237	NaN	NaN	NaN	NaN
	-0.0287299	-0.178659	-0.0728865	0.240028	-0.019982	0.0278122	NaN	NaN	NaN	NaN
	-0.145877	-0.056624	-0.022538	0.0769692	0.0473852	0.151566	NaN	NaN	NaN	NaN
	-0.0520512	0.0353177	0.12233	-0.353071	0.0468173	0.109417	NaN	NaN	NaN	NaN
	0.169503	0.0852633	0.119255	-0.41359	0.0140713	-0.126933	NaN	NaN	NaN	NaN
	0.00912404	0.0770153	-0.171047	0.0783953	0.0894174	-0.0934285	NaN	NaN	NaN	NaN
	-0.0200697	-0.196507	-0.149033	0.204977	-0.0967757	0.130754	NaN	NaN	NaN	NaN
	-0.127986	0.093404	-0.0492256	0.375675	0.0463043	0.10065	NaN	NaN	NaN	NaN
	0.235951	0.00950816	-0.0514172	0.00173612	0.0325317	-0.0719378	NaN	NaN	NaN	NaN
	0.490457	0.0358255	0.274343	0.103436	0.120713	0.0502764	NaN	NaN	NaN	NaN
	-0.0564402	-0.0199282	0.0445696	-0.0398183	-0.124671	0.00396102	NaN	NaN	NaN	NaN
	-0.105746	-0.144101	-0.261868	0.0581123	0.0563123	0.149526	NaN	NaN	NaN	NaN
	0.0299533	-0.0336473	-0.0705236	0.392102	-0.0999342	-0.122579	NaN	NaN	NaN	NaN
	0.1524	-0.0229039	0.201606	0.0464943	-0.0893971	-0.0813758	NaN	NaN	NaN	NaN
	0.192636	-0.23392	-0.0458913	-0.114595	0.0229249	0.00444801	NaN	NaN	NaN	NaN
	0.087536	0.018722	0.192751	0.0370826	0.101825	-0.168281	NaN	NaN	NaN	NaN
	0.204467	0.0724207	0.163217	-0.194967	-0.193512	-0.0027474	NaN	NaN	NaN	NaN
	-0.0265008	0.00156268	-0.0465225	-0.0995204	-0.100669	-0.0716449	NaN	NaN	NaN	NaN
	-0.285214	-0.0168584	0.0988822	0.113453	-0.106631	NaN	NaN	NaN	NaN	NaN
	-0.0871606	0.0224722	0.135413	-0.0463142	0.0536802	NaN	NaN	NaN	NaN	NaN
	0.252295	0.193642	0.0264609	0.00147095	-0.0398383	NaN	NaN	NaN	NaN	NaN
	-0.115045	0.0839037	0.0516013	-0.211863	-1.24905e-06	NaN	NaN	NaN	NaN	NaN
	0.041762	0.0768826	-0.273251	0.540639	-0.0316906	NaN	NaN	NaN	NaN	NaN
	-0.0174879	-0.103616	-0.0263809	-0.301007	0.0437862	NaN	NaN	NaN	NaN	NaN
	0.0633097	-0.00313814	0.161889	0.292302	0.0309163	NaN	NaN	NaN	NaN	NaN
	0.0878864	-0.149625	0.0561968	-0.0170564	0.0600246	NaN	NaN	NaN	NaN	NaN
	0.262342	-0.166043	0.134066	0.0217407	-0.0402312	NaN	NaN	NaN	NaN	NaN
	-0.194007	0.00110212	-0.44792	-0.155505	0.175078	NaN	NaN	NaN	NaN	NaN
	-0.122162	0.018447	0.199144	-0.388485	-0.0826115	NaN	NaN	NaN	NaN	NaN
	0.0214537	0.111502	0.088712	0.186235	0.0631475	NaN	NaN	NaN	NaN	NaN
	0.018178	-0.345855	-0.0225234	0.0784239	-0.0132813	NaN	NaN	NaN	NaN	NaN
	-0.0284185	0.0888872	0.298394	-0.221577	0.0764164	NaN	NaN	NaN	NaN	NaN
	0.0474103	-0.233709	-0.0578174	0.296745	-0.0548774	NaN	NaN	NaN	NaN	NaN
	-0.165592	0.26727	-0.0284564	0.0935412	0.0727351	NaN	NaN	NaN	NaN	NaN
	-0.100917	-0.002039	-0.0587301	-0.0845028	0.0674089	NaN	NaN	NaN	NaN	NaN
	-0.0461691	0.0565077	0.118429	0.297956	0.0370025	NaN	NaN	NaN	NaN	NaN
	0.0619534	0.0177369	-0.0304687	-0.378174	-0.0300573	NaN	NaN	NaN	NaN	NaN
	0.171404	-0.0268133	0.0300577	-0.180822	-0.0612473	NaN	NaN	NaN	NaN	NaN
	-0.457486	-0.119797	0.0302477	-0.0770807	0.0462837	NaN	NaN	NaN	NaN	NaN
	0.0670895	-0.0880477	0.203321	0.364714	-0.0216333	NaN	NaN	NaN	NaN	NaN
	-0.0918298	0.0856032	-0.0883196	0.150863	0.0167446	NaN	NaN	NaN	NaN	NaN
	0.224272	0.157765	0.160032	-0.177856	-0.0975135	NaN	NaN	NaN	NaN	NaN
	0.000468031	-0.0409987	0.0208061	-0.0597512	-0.0579725	NaN	NaN	NaN	NaN	NaN
	0.0865829	-0.0104662	-0.0619312	-0.167754	0.0248888	NaN	NaN	NaN	NaN	NaN
	0.425632	-0.0575717	-0.146351	0.0102419	-0.0181766	NaN	NaN	NaN	NaN	NaN
	0.053806	0.0116039	0.0611125	-0.0398755	0.0418052	NaN	NaN	NaN	NaN	NaN
	0.0712201	0.0331184	0.0943628	0.483216	0.0284539	NaN	NaN	NaN	NaN	NaN
	-0.00165405	-0.0758403	-0.24057	0.01976	0.0862905	NaN	NaN	NaN	NaN	NaN
	-0.136031	0.0404138	0.325205	0.26568	0.0140345	NaN	NaN	NaN	NaN	NaN
	0.189096	-0.240467	-0.0319764	0.146081	0.0640015	NaN	NaN	NaN	NaN	NaN
	0.251417	0.0696899	-0.100461	0.234395	0.0333933	NaN	NaN	NaN	NaN	NaN
	-0.128614	-0.0957134	0.0436404	0.0611091	-0.0223108	NaN	NaN	NaN	NaN	NaN
	-0.092023	-0.0899761	-0.044129	0.513377	-0.00768936	NaN	NaN	NaN	NaN	NaN
	0.0625448	0.0942082	-0.176605	-0.150369	-0.0360882	NaN	NaN	NaN	NaN	NaN
	0.0816264	-0.0259643	0.116791	-0.0430048	-0.0350292	NaN	NaN	NaN	NaN	NaN
	0.161153	0.0266606	-0.028408	0.266049	-0.0121284	NaN	NaN	NaN	NaN	NaN
	-0.113497	-0.0653646	-0.0536016	0.248484	0.0327734	NaN	NaN	NaN	NaN	NaN
	-0.204119	-0.167618	0.0836586	-0.00953409	-0.0243395	NaN	NaN	NaN	NaN	NaN
	-0.0737422	-0.274688	0.0948606	-0.0308067	-0.0338939	NaN	NaN	NaN	NaN	NaN
	-0.241923	0.135707	0.0435236	-0.133456	-0.205181	NaN	NaN	NaN	NaN	NaN
	-0.197559	-0.0822054	0.205137	0.198112	-0.16886	NaN	NaN	NaN	NaN	NaN
	-0.213974	NaN	-0.00194433	0.168534	-0.0128413	NaN	NaN	NaN	NaN	NaN
	0.0980228	NaN	-0.225536	0.266657	-0.0844548	NaN	NaN	NaN	NaN	NaN
	-0.0847334	NaN	-0.0811058	0.319646	-0.162368	NaN	NaN	NaN	NaN	NaN
	-0.0064227	NaN	-0.0741243	0.0551094	NaN	NaN	NaN	NaN	NaN	NaN
	-0.111346	NaN	-0.207444	0.60333	NaN	NaN	NaN	NaN	NaN	NaN
	-0.0395301	NaN	-0.166333	-0.180262	NaN	NaN	NaN	NaN	NaN	NaN
	-0.0694402	NaN	-0.217115	-0.27081	NaN	NaN	NaN	NaN	NaN	NaN
	-0.168595	NaN	0.129752	-0.0943384	NaN	NaN	NaN	NaN	NaN	NaN
	0.0267601	NaN	0.0865632	-0.39191	NaN	NaN	NaN	NaN	NaN	NaN
	0.146254	NaN	0.235945	0.423775	NaN	NaN	NaN	NaN	NaN	NaN
	0.273318	NaN	0.0256033	0.372445	NaN	NaN	NaN	NaN	NaN	NaN
	-0.229342	NaN	-0.0192806	-0.043275	NaN	NaN	NaN	NaN	NaN	NaN
	0.208183	NaN	-0.0434173	0.227036	NaN	NaN	NaN	NaN	NaN	NaN
	0.288683	NaN	-0.271556	NaN	NaN	NaN	NaN	NaN	NaN	NaN
	-0.0801964	NaN	0.210942	0.318039	NaN	NaN	NaN	NaN	NaN	NaN
	-0.0704467	NaN	-0.214605	-0.16171	NaN	NaN	NaN	NaN	NaN	NaN
	0.200803	NaN	-0.102343	-0.0513137	NaN	NaN	NaN	NaN	NaN	NaN
	-0.0179167	NaN	0.0330531	0.165399	NaN	NaN	NaN	NaN	NaN	NaN
	0.0692351	NaN	-0.0482185	0.109495	NaN	NaN	NaN	NaN	NaN	NaN
	-0.0246878	NaN	0.194095	0.120786	NaN	NaN	NaN	NaN	NaN	NaN
	0.0876566	NaN	-0.139422	-0.202894	NaN	NaN	NaN	NaN	NaN	NaN
	0.0510224	NaN	-0.0172046	0.446469	NaN	NaN	NaN	NaN	NaN	NaN
	0.296245	NaN	0.011078	0.195726	NaN	NaN	NaN	NaN	NaN	NaN
	-0.0701634	NaN	-0.0481491	-0.128591	NaN	NaN	NaN	NaN	NaN	NaN
	0.0641867	NaN	-0.297533	-0.117044	NaN	NaN	NaN	NaN	NaN	NaN
	0.067831	NaN	0.031054	NaN	NaN	NaN	NaN	NaN	NaN	NaN
	-0.240052	NaN	-0.0972547	NaN	NaN	NaN	NaN	NaN	NaN	NaN
	0.342007	NaN	0.0937602	NaN	NaN	NaN	NaN	NaN	NaN	NaN
	0.0516988	NaN	0.256831	NaN	NaN	NaN	NaN	NaN	NaN	NaN
	-0.196913	NaN	-0.200971	NaN	NaN	NaN	NaN	NaN	NaN	NaN
	-0.0339808	NaN	-0.258607	NaN	NaN	NaN	NaN	NaN	NaN	NaN
	0.169506	NaN	0.0899351	NaN	NaN	NaN	NaN	NaN	NaN	NaN
	0.101577	NaN	0.0859978	NaN	NaN	NaN	NaN	NaN	NaN	NaN
	-0.238474	NaN	0.0416188	NaN	NaN	NaN	NaN	NaN	NaN	NaN
	0.130312	NaN	0.00537818	NaN	NaN	NaN	NaN	NaN	NaN	NaN
	0.147127	NaN	-0.0155271	NaN	NaN	NaN	NaN	NaN	NaN	NaN
	-0.453018	NaN	-0.0363998	NaN	NaN	NaN	NaN	NaN	NaN	NaN
	-0.0686215	NaN	-0.0960369	NaN	NaN	NaN	NaN	NaN	NaN	NaN
	0.0495008	NaN	0.00461471	NaN	NaN	NaN	NaN	NaN	NaN	NaN
	0.177606	NaN	-0.0875576	NaN	NaN	NaN	NaN	NaN	NaN	NaN
	-0.142017	NaN	-0.126835	NaN	NaN	NaN	NaN	NaN	NaN	NaN
	0.136885	NaN	-0.0365552	NaN	NaN	NaN	NaN	NaN	NaN	NaN
	-0.0393477	NaN	-0.211339	NaN	NaN	NaN	NaN	NaN	NaN	NaN
	0.107629	NaN	-0.0519752	NaN	NaN	NaN	NaN	NaN	NaN	NaN
	-0.115765	NaN	-0.617829	NaN	NaN	NaN	NaN	NaN	NaN	NaN
	-0.125581	NaN	-0.29391	NaN	NaN	NaN	NaN	NaN	NaN	NaN
	0.0230321	NaN	-0.200516	NaN	NaN	NaN	NaN	NaN	NaN	NaN
	0.0514486	NaN	-0.0119889	NaN	NaN	NaN	NaN	NaN	NaN	NaN
	-0.0441843	NaN	-0.0221776	NaN	NaN	NaN	NaN	NaN	NaN	NaN
	0.092567	NaN	-0.0111354	NaN	NaN	NaN	NaN	NaN	NaN	NaN
	-0.321234	NaN	-0.0708967	NaN	NaN	NaN	NaN	NaN	NaN	NaN
	-0.136875	NaN	0.274054	NaN	NaN	NaN	NaN	NaN	NaN	NaN
	-0.162925	NaN	-0.114995	NaN	NaN	NaN	NaN	NaN	NaN	NaN
	-0.0109609	NaN	0.0847315	NaN	NaN	NaN	NaN	NaN	NaN	NaN
	-0.0303691	NaN	-0.173047	NaN	NaN	NaN	NaN	NaN	NaN	NaN
	0.0312177	NaN	-0.00999659	NaN	NaN	NaN	NaN	NaN	NaN	NaN
	-0.0866246	NaN	-0.0341641	NaN	NaN	NaN	NaN	NaN	NaN	NaN
	0.118583	NaN	0.0430996	NaN	NaN	NaN	NaN	NaN	NaN	NaN
	0.235576	NaN	0.0646575	NaN	NaN	NaN	NaN	NaN	NaN	NaN
	0.0432265	NaN	0.0861742	NaN	NaN	NaN	NaN	NaN	NaN	NaN
	-0.0947042	NaN	0.0658847	NaN	NaN	NaN	NaN	NaN	NaN	NaN
	-0.157872	NaN	0.00879589	NaN	NaN	NaN	NaN	NaN	NaN	NaN
	0.0469758	NaN	-0.25327	NaN	NaN	NaN	NaN	NaN	NaN	NaN
	-0.109821	NaN	0.419282	NaN	NaN	NaN	NaN	NaN	NaN	NaN
	-0.0423242	NaN	0.127236	NaN	NaN	NaN	NaN	NaN	NaN	NaN
	0.0402379	NaN	0.139584	NaN	NaN	NaN	NaN	NaN	NaN	NaN
	0.0414216	NaN	0.0260617	NaN	NaN	NaN	NaN	NaN	NaN	NaN
	-0.0704992	NaN	0.147066	NaN	NaN	NaN	NaN	NaN	NaN	NaN
	-0.0161853	NaN	0.0736425	NaN	NaN	NaN	NaN	NaN	NaN	NaN
	-0.0682304	NaN	-0.0443986	NaN	NaN	NaN	NaN	NaN	NaN	NaN
	-0.0770669	NaN	-0.0664379	NaN	NaN	NaN	NaN	NaN	NaN	NaN
	-0.422643	NaN	0.101806	NaN	NaN	NaN	NaN	NaN	NaN	NaN
	0.252801	NaN	-0.0183928	NaN	NaN	NaN	NaN	NaN	NaN	NaN
	-0.109818	NaN	-0.0943192	NaN	NaN	NaN	NaN	NaN	NaN	NaN
	-0.0768846	NaN	0.2199	NaN	NaN	NaN	NaN	NaN	NaN	NaN
	0.062012	NaN	0.354056	NaN	NaN	NaN	NaN	NaN	NaN	NaN
	-0.0290484	NaN	-0.0214797	NaN	NaN	NaN	NaN	NaN	NaN	NaN
	0.0871567	NaN	-0.103731	NaN	NaN	NaN	NaN	NaN	NaN	NaN
	-0.130593	NaN	-0.271072	NaN	NaN	NaN	NaN	NaN	NaN	NaN
	-0.089146	NaN	0.127623	NaN	NaN	NaN	NaN	NaN	NaN	NaN
	-0.307092	NaN	0.0149867	NaN	NaN	NaN	NaN	NaN	NaN	NaN
	0.125682	NaN	-0.365164	NaN	NaN	NaN	NaN	NaN	NaN	NaN
	0.114044	NaN	-0.0350747	NaN	NaN	NaN	NaN	NaN	NaN	NaN
	0.182402	NaN	0.216019	NaN	NaN	NaN	NaN	NaN	NaN	NaN
	0.158135	NaN	-0.00801958	NaN	NaN	NaN	NaN	NaN	NaN	NaN
	0.157882	NaN	-0.0168523	NaN	NaN	NaN	NaN	NaN	NaN	NaN
	0.143248	NaN	0.0938096	NaN	NaN	NaN	NaN	NaN	NaN	NaN
	-0.274887	NaN	0.15365	NaN	NaN	NaN	NaN	NaN	NaN	NaN
	0.25351	NaN	-0.233889	NaN	NaN	NaN	NaN	NaN	NaN	NaN
	0.0991332	NaN	0.209551	NaN	NaN	NaN	NaN	NaN	NaN	NaN
	-0.0426774	NaN	-0.521831	NaN	NaN	NaN	NaN	NaN	NaN	NaN
	-0.0961412	NaN	0.512294	NaN	NaN	NaN	NaN	NaN	NaN	NaN
	0.0390723	NaN	-0.0315089	NaN	NaN	NaN	NaN	NaN	NaN	NaN
	0.0944265	NaN	-0.131033	NaN	NaN	NaN	NaN	NaN	NaN	NaN
	0.0890852	NaN	-0.19879	NaN	NaN	NaN	NaN	NaN	NaN	NaN
	0.21714	NaN	0.32759	NaN	NaN	NaN	NaN	NaN	NaN	NaN
	0.0299909	NaN	0.280931	NaN	NaN	NaN	NaN	NaN	NaN	NaN
	-0.380757	NaN	0.0523828	NaN	NaN	NaN	NaN	NaN	NaN	NaN
	0.00821747	NaN	0.279625	NaN	NaN	NaN	NaN	NaN	NaN	NaN
	-0.107808	NaN	0.0532638	NaN	NaN	NaN	NaN	NaN	NaN	NaN
	0.114298	NaN	0.149759	NaN	NaN	NaN	NaN	NaN	NaN	NaN
	-0.149381	NaN	-0.364456	NaN	NaN	NaN	NaN	NaN	NaN	NaN
	-0.0941808	NaN	-0.0337328	NaN	NaN	NaN	NaN	NaN	NaN	NaN
	0.148935	NaN	-0.248562	NaN	NaN	NaN	NaN	NaN	NaN	NaN
	-0.00202373	NaN	-0.114489	NaN	NaN	NaN	NaN	NaN	NaN	NaN
	0.0314623	NaN	-0.186477	NaN	NaN	NaN	NaN	NaN	NaN	NaN
	0.324685	NaN	0.196134	NaN	NaN	NaN	NaN	NaN	NaN	NaN
	0.119522	NaN	0.34848	NaN	NaN	NaN	NaN	NaN	NaN	NaN
	0.0204093	NaN	0.0163776	NaN	NaN	NaN	NaN	NaN	NaN	NaN
	-0.0512142	NaN	-0.0997997	NaN	NaN	NaN	NaN	NaN	NaN	NaN
	-0.288437	NaN	-0.0148262	NaN	NaN	NaN	NaN	NaN	NaN	NaN
	-0.00528574	NaN	-0.0846458	NaN	NaN	NaN	NaN	NaN	NaN	NaN
	-0.0596192	NaN	-0.034661	NaN	NaN	NaN	NaN	NaN	NaN	NaN
	0.120143	NaN	-0.0888371	NaN	NaN	NaN	NaN	NaN	NaN	NaN
	-0.212893	NaN	0.163653	NaN	NaN	NaN	NaN	NaN	NaN	NaN
	-0.0254535	NaN	-0.0430123	NaN	NaN	NaN	NaN	NaN	NaN	NaN
	0.020993	NaN	0.0844377	NaN	NaN	NaN	NaN	NaN	NaN	NaN
	-0.392945	NaN	-0.00163808	NaN	NaN	NaN	NaN	NaN	NaN	NaN
	0.107952	NaN	0.000424784	NaN	NaN	NaN	NaN	NaN	NaN	NaN
	-0.0914854	NaN	-0.223667	NaN	NaN	NaN	NaN	NaN	NaN	NaN
	0.0880089	NaN	0.0805466	NaN	NaN	NaN	NaN	NaN	NaN	NaN
	-0.221241	NaN	-0.0337943	NaN	NaN	NaN	NaN	NaN	NaN	NaN
	0.196747	NaN	-0.129177	NaN	NaN	NaN	NaN	NaN	NaN	NaN
	0.0892866	NaN	0.223097	NaN	NaN	NaN	NaN	NaN	NaN	NaN
	0.0095255	NaN	0.299645	NaN	NaN	NaN	NaN	NaN	NaN	NaN
	0.363852	NaN	0.351702	NaN	NaN	NaN	NaN	NaN	NaN	NaN
	0.0484288	NaN	-0.207438	NaN	NaN	NaN	NaN	NaN	NaN	NaN
	0.0916028	NaN	-0.0545093	NaN	NaN	NaN	NaN	NaN	NaN	NaN
	0.120099	NaN	-0.0606635	NaN	NaN	NaN	NaN	NaN	NaN	NaN
	-0.172172	NaN	-0.0345382	NaN	NaN	NaN	NaN	NaN	NaN	NaN
	-0.40954	NaN	0.00176608	NaN	NaN	NaN	NaN	NaN	NaN	NaN
	0.0211058	NaN	-0.0694726	NaN	NaN	NaN	NaN	NaN	NaN	NaN
	-0.216273	NaN	0.096185	NaN	NaN	NaN	NaN	NaN	NaN	NaN
	0.0265775	NaN	-0.0399412	NaN	NaN	NaN	NaN	NaN	NaN	NaN
	-0.0340241	NaN	0.258163	NaN	NaN	NaN	NaN	NaN	NaN	NaN
	0.0670018	NaN	0.178572	NaN	NaN	NaN	NaN	NaN	NaN	NaN
	0.0968074	NaN	0.431664	NaN	NaN	NaN	NaN	NaN	NaN	NaN
	0.00665473	NaN	-0.252714	NaN	NaN	NaN	NaN	NaN	NaN	NaN
	0.0885193	NaN	-0.0687856	NaN	NaN	NaN	NaN	NaN	NaN	NaN
	0.261492	NaN	-0.0638647	NaN	NaN	NaN	NaN	NaN	NaN	NaN
	-0.0771306	NaN	0.141946	NaN	NaN	NaN	NaN	NaN	NaN	NaN
	-0.0180606	NaN	0.264301	NaN	NaN	NaN	NaN	NaN	NaN	NaN
	-0.245093	NaN	0.110714	NaN	NaN	NaN	NaN	NaN	NaN	NaN
	-0.170765	NaN	-0.0725168	NaN	NaN	NaN	NaN	NaN	NaN	NaN
	0.22389	NaN	-0.0144009	NaN	NaN	NaN	NaN	NaN	NaN	NaN
	-0.0499461	NaN	-0.198941	NaN	NaN	NaN	NaN	NaN	NaN	NaN
	-0.154673	NaN	-0.0856615	NaN	NaN	NaN	NaN	NaN	NaN	NaN
	0.161624	NaN	-0.292889	NaN	NaN	NaN	NaN	NaN	NaN	NaN
	-0.00992121	NaN	-0.442506	NaN	NaN	NaN	NaN	NaN	NaN	NaN
	0.0842373	NaN	0.190994	NaN	NaN	NaN	NaN	NaN	NaN	NaN
	0.0382341	NaN	-0.0122474	NaN	NaN	NaN	NaN	NaN	NaN	NaN
	0.146371	NaN	-0.557518	NaN	NaN	NaN	NaN	NaN	NaN	NaN
	-0.172392	NaN	0.32987	NaN	NaN	NaN	NaN	NaN	NaN	NaN
	0.597389	NaN	0.0151663	NaN	NaN	NaN	NaN	NaN	NaN	NaN
	0.0989882	NaN	-0.0388663	NaN	NaN	NaN	NaN	NaN	NaN	NaN
	-0.0651522	NaN	-0.0351881	NaN	NaN	NaN	NaN	NaN	NaN	NaN
	-0.167039	NaN	0.251529	NaN	NaN	NaN	NaN	NaN	NaN	NaN
	0.0651956	NaN	0.0544997	NaN	NaN	NaN	NaN	NaN	NaN	NaN
	0.181934	NaN	0.038878	NaN	NaN	NaN	NaN	NaN	NaN	NaN
	0.0362585	NaN	-0.347252	NaN	NaN	NaN	NaN	NaN	NaN	NaN
	-0.139071	NaN	0.185117	NaN	NaN	NaN	NaN	NaN	NaN	NaN
	-0.244384	NaN	-0.0954893	NaN	NaN	NaN	NaN	NaN	NaN	NaN
	0.183503	NaN	0.121896	NaN	NaN	NaN	NaN	NaN	NaN	NaN
	0.0290616	NaN	0.0333065	NaN	NaN	NaN	NaN	NaN	NaN	NaN
	-0.186964	NaN	0.183752	NaN	NaN	NaN	NaN	NaN	NaN	NaN
	-0.0621131	NaN	0.150905	NaN	NaN	NaN	NaN	NaN	NaN	NaN
	0.160266	NaN	-0.212046	NaN	NaN	NaN	NaN	NaN	NaN	NaN
	-0.247093	NaN	-0.0422783	NaN	NaN	NaN	NaN	NaN	NaN	NaN
	-0.102339	NaN	0.123351	NaN	NaN	NaN	NaN	NaN	NaN	NaN
	0.0247108	NaN	0.029676	NaN	NaN	NaN	NaN	NaN	NaN	NaN
	0.00813126	NaN	0.115059	NaN	NaN	NaN	NaN	NaN	NaN	NaN
	-0.00407886	NaN	0.0579833	NaN	NaN	NaN	NaN	NaN	NaN	NaN
	-0.0130159	NaN	0.39943	NaN	NaN	NaN	NaN	NaN	NaN	NaN
	-0.114592	NaN	0.0917596	NaN	NaN	NaN	NaN	NaN	NaN	NaN
	0.0585348	NaN	-0.0467427	NaN	NaN	NaN	NaN	NaN	NaN	NaN
	-0.0108825	NaN	-0.509361	NaN	NaN	NaN	NaN	NaN	NaN	NaN
	0.133386	NaN	-0.10499	NaN	NaN	NaN	NaN	NaN	NaN	NaN
	0.020235	NaN	-0.0797233	NaN	NaN	NaN	NaN	NaN	NaN	NaN
	0.281545	NaN	-0.0181788	NaN	NaN	NaN	NaN	NaN	NaN	NaN
	0.150138	NaN	-0.0887068	NaN	NaN	NaN	NaN	NaN	NaN	NaN
	0.161724	NaN	-0.128024	NaN	NaN	NaN	NaN	NaN	NaN	NaN
	0.0470375	NaN	-0.224075	NaN	NaN	NaN	NaN	NaN	NaN	NaN
	0.161541	NaN	-0.140478	NaN	NaN	NaN	NaN	NaN	NaN	NaN
	0.101166	NaN	0.581183	NaN	NaN	NaN	NaN	NaN	NaN	NaN
	0.00837961	NaN	-1	NaN	NaN	NaN	NaN	NaN	NaN	NaN
	-0.126413	NaN	0.165993	NaN	NaN	NaN	NaN	NaN	NaN	NaN
	-0.00672845	NaN	0.0780675	NaN	NaN	NaN	NaN	NaN	NaN	NaN
	0.153322	NaN	-0.150836	NaN	NaN	NaN	NaN	NaN	NaN	NaN
	0.0377375	NaN	NaN	NaN	NaN	NaN	NaN	NaN	NaN	NaN
	-0.138198	NaN	0.195438	NaN	NaN	NaN	NaN	NaN	NaN	NaN
	0.0390835	NaN	0.110551	NaN	NaN	NaN	NaN	NaN	NaN	NaN
	-0.0782798	NaN	NaN	NaN	NaN	NaN	NaN	NaN	NaN	NaN
	0.0220698	NaN	-0.0744297	NaN	NaN	NaN	NaN	NaN	NaN	NaN
	0.0623457	NaN	0.0899856	NaN	NaN	NaN	NaN	NaN	NaN	NaN
	0.231233	NaN	0.0328123	NaN	NaN	NaN	NaN	NaN	NaN	NaN
	0.0457184	NaN	0.0991349	NaN	NaN	NaN	NaN	NaN	NaN	NaN
	0.101696	NaN	-0.253094	NaN	NaN	NaN	NaN	NaN	NaN	NaN
	-0.125279	NaN	NaN	NaN	NaN	NaN	NaN	NaN	NaN	NaN
	0.554594	NaN	NaN	NaN	NaN	NaN	NaN	NaN	NaN	NaN
	-0.0892056	NaN	0.212002	NaN	NaN	NaN	NaN	NaN	NaN	NaN
	-0.00689358	NaN	0.16242	NaN	NaN	NaN	NaN	NaN	NaN	NaN
	-0.0692132	NaN	-0.118096	NaN	NaN	NaN	NaN	NaN	NaN	NaN
	-0.36538	NaN	NaN	NaN	NaN	NaN	NaN	NaN	NaN	NaN
	-0.111493	NaN	-0.156837	NaN	NaN	NaN	NaN	NaN	NaN	NaN
	-0.0834504	NaN	NaN	NaN	NaN	NaN	NaN	NaN	NaN	NaN
	-0.0341001	NaN	-0.154336	NaN	NaN	NaN	NaN	NaN	NaN	NaN
	0.12703	NaN	-0.221329	NaN	NaN	NaN	NaN	NaN	NaN	NaN
	0.277639	NaN	-0.0326414	NaN	NaN	NaN	NaN	NaN	NaN	NaN
	0.0585758	NaN	0.156232	NaN	NaN	NaN	NaN	NaN	NaN	NaN
	0.0237771	NaN	-0.399393	NaN	NaN	NaN	NaN	NaN	NaN	NaN
	-0.850507	NaN	-0.0180514	NaN	NaN	NaN	NaN	NaN	NaN	NaN
	-0.325481	NaN	0.0514939	NaN	NaN	NaN	NaN	NaN	NaN	NaN
	0.150333	NaN	0.202217	NaN	NaN	NaN	NaN	NaN	NaN	NaN
	0.0832538	NaN	0.176995	NaN	NaN	NaN	NaN	NaN	NaN	NaN
	-0.0933803	NaN	0.031478	NaN	NaN	NaN	NaN	NaN	NaN	NaN
	-0.101291	NaN	-0.00413208	NaN	NaN	NaN	NaN	NaN	NaN	NaN
	0.0652451	NaN	0.128923	NaN	NaN	NaN	NaN	NaN	NaN	NaN
	0.134745	NaN	0.207639	NaN	NaN	NaN	NaN	NaN	NaN	NaN
	-0.167498	NaN	NaN	NaN	NaN	NaN	NaN	NaN	NaN	NaN
	0.0219184	NaN	-0.375991	NaN	NaN	NaN	NaN	NaN	NaN	NaN
	0.277807	NaN	NaN	NaN	NaN	NaN	NaN	NaN	NaN	NaN
	-0.41047	NaN	NaN	NaN	NaN	NaN	NaN	NaN	NaN	NaN
	0.0523344	NaN	NaN	NaN	NaN	NaN	NaN	NaN	NaN	NaN
	0.0715184	NaN	0.0737599	NaN	NaN	NaN	NaN	NaN	NaN	NaN
	-0.136845	NaN	-0.0600344	NaN	NaN	NaN	NaN	NaN	NaN	NaN
	0.0144871	NaN	-0.423694	NaN	NaN	NaN	NaN	NaN	NaN	NaN
	0.170255	NaN	0.107474	NaN	NaN	NaN	NaN	NaN	NaN	NaN
	0.0316175	NaN	-0.101087	NaN	NaN	NaN	NaN	NaN	NaN	NaN
	-0.232281	NaN	0.129123	NaN	NaN	NaN	NaN	NaN	NaN	NaN
	-0.222704	NaN	0.0766848	NaN	NaN	NaN	NaN	NaN	NaN	NaN
	-0.295607	NaN	0.294815	NaN	NaN	NaN	NaN	NaN	NaN	NaN
	0.0469555	NaN	-0.328242	NaN	NaN	NaN	NaN	NaN	NaN	NaN
	0.0111238	NaN	0.0620126	NaN	NaN	NaN	NaN	NaN	NaN	NaN
	-0.0475296	NaN	-0.168833	NaN	NaN	NaN	NaN	NaN	NaN	NaN
	0.237817	NaN	0.261019	NaN	NaN	NaN	NaN	NaN	NaN	NaN
	0.0476439	NaN	0.274345	NaN	NaN	NaN	NaN	NaN	NaN	NaN
	0.255326	NaN	0.300142	NaN	NaN	NaN	NaN	NaN	NaN	NaN
	-0.0616544	NaN	0.0706938	NaN	NaN	NaN	NaN	NaN	NaN	NaN
	-0.0471073	NaN	-0.0846219	NaN	NaN	NaN	NaN	NaN	NaN	NaN
	-0.0422911	NaN	-0.203556	NaN	NaN	NaN	NaN	NaN	NaN	NaN
	-0.0271934	NaN	-0.109288	NaN	NaN	NaN	NaN	NaN	NaN	NaN
	-0.0587166	NaN	-0.0272308	NaN	NaN	NaN	NaN	NaN	NaN	NaN
	-0.0808171	NaN	-0.0799199	NaN	NaN	NaN	NaN	NaN	NaN	NaN
	-0.122204	NaN	0.189326	NaN	NaN	NaN	NaN	NaN	NaN	NaN
	0.322387	NaN	0.00790384	NaN	NaN	NaN	NaN	NaN	NaN	NaN
	-0.264143	NaN	-0.0549404	NaN	NaN	NaN	NaN	NaN	NaN	NaN
	0.216563	NaN	-0.0895324	NaN	NaN	NaN	NaN	NaN	NaN	NaN
	-0.0423934	NaN	-0.00767357	NaN	NaN	NaN	NaN	NaN	NaN	NaN
	0.0646609	NaN	-0.137775	NaN	NaN	NaN	NaN	NaN	NaN	NaN
	0.305535	NaN	-0.1784	NaN	NaN	NaN	NaN	NaN	NaN	NaN
	0.43442	NaN	0.135073	NaN	NaN	NaN	NaN	NaN	NaN	NaN
	0.0247981	NaN	-0.00459324	NaN	NaN	NaN	NaN	NaN	NaN	NaN
	-0.205351	NaN	0.0126682	NaN	NaN	NaN	NaN	NaN	NaN	NaN
	0.00751176	NaN	0.128306	NaN	NaN	NaN	NaN	NaN	NaN	NaN
	0.226677	NaN	-0.107425	NaN	NaN	NaN	NaN	NaN	NaN	NaN
	0.139639	NaN	0.0333769	NaN	NaN	NaN	NaN	NaN	NaN	NaN
	0.0971711	NaN	0.0760311	NaN	NaN	NaN	NaN	NaN	NaN	NaN
	0.0246258	NaN	-0.082547	NaN	NaN	NaN	NaN	NaN	NaN	NaN
	0.0670594	NaN	0.292776	NaN	NaN	NaN	NaN	NaN	NaN	NaN
	-0.17514	NaN	0.155101	NaN	NaN	NaN	NaN	NaN	NaN	NaN
	0.217049	NaN	-0.501483	NaN	NaN	NaN	NaN	NaN	NaN	NaN
	0.0682047	NaN	-0.114816	NaN	NaN	NaN	NaN	NaN	NaN	NaN
	0.161222	NaN	0.0201893	NaN	NaN	NaN	NaN	NaN	NaN	NaN
	-0.0932835	NaN	-0.0458649	NaN	NaN	NaN	NaN	NaN	NaN	NaN
	-0.181241	NaN	NaN	NaN	NaN	NaN	NaN	NaN	NaN	NaN
	-0.049559	NaN	NaN	NaN	NaN	NaN	NaN	NaN	NaN	NaN
	-0.0667498	NaN	NaN	NaN	NaN	NaN	NaN	NaN	NaN	NaN
	0.236016	NaN	NaN	NaN	NaN	NaN	NaN	NaN	NaN	NaN
	-0.20645	NaN	NaN	NaN	NaN	NaN	NaN	NaN	NaN	NaN
	-0.0521821	NaN	NaN	NaN	NaN	NaN	NaN	NaN	NaN	NaN
	-0.00477513	NaN	NaN	NaN	NaN	NaN	NaN	NaN	NaN	NaN
	-0.00385088	NaN	NaN	NaN	NaN	NaN	NaN	NaN	NaN	NaN
	-0.0271578	NaN	NaN	NaN	NaN	NaN	NaN	NaN	NaN	NaN
	0.0446452	NaN	NaN	NaN	NaN	NaN	NaN	NaN	NaN	NaN
	-0.133513	NaN	NaN	NaN	NaN	NaN	NaN	NaN	NaN	NaN
	0.0109156	NaN	NaN	NaN	NaN	NaN	NaN	NaN	NaN	NaN
	0.202861	NaN	NaN	NaN	NaN	NaN	NaN	NaN	NaN	NaN
	-0.11117	NaN	NaN	NaN	NaN	NaN	NaN	NaN	NaN	NaN
	0.193027	NaN	NaN	NaN	NaN	NaN	NaN	NaN	NaN	NaN
	-0.289538	NaN	NaN	NaN	NaN	NaN	NaN	NaN	NaN	NaN
	-0.187605	NaN	NaN	NaN	NaN	NaN	NaN	NaN	NaN	NaN
	-0.0239647	NaN	NaN	NaN	NaN	NaN	NaN	NaN	NaN	NaN
	0.0571602	NaN	NaN	NaN	NaN	NaN	NaN	NaN	NaN	NaN
	-0.16455	NaN	NaN	NaN	NaN	NaN	NaN	NaN	NaN	NaN
	-0.0524792	NaN	NaN	NaN	NaN	NaN	NaN	NaN	NaN	NaN
	0.188285	NaN	NaN	NaN	NaN	NaN	NaN	NaN	NaN	NaN
	0.0821725	NaN	NaN	NaN	NaN	NaN	NaN	NaN	NaN	NaN
	0.0015787	NaN	NaN	NaN	NaN	NaN	NaN	NaN	NaN	NaN
	-0.103014	NaN	NaN	NaN	NaN	NaN	NaN	NaN	NaN	NaN
	0.074164	NaN	NaN	NaN	NaN	NaN	NaN	NaN	NaN	NaN
	-0.0309398	NaN	NaN	NaN	NaN	NaN	NaN	NaN	NaN	NaN
	0.190746	NaN	NaN	NaN	NaN	NaN	NaN	NaN	NaN	NaN
	0.0039842	NaN	NaN	NaN	NaN	NaN	NaN	NaN	NaN	NaN
	-0.326335	NaN	NaN	NaN	NaN	NaN	NaN	NaN	NaN	NaN
	-0.0860472	NaN	NaN	NaN	NaN	NaN	NaN	NaN	NaN	NaN
	-0.472374	NaN	NaN	NaN	NaN	NaN	NaN	NaN	NaN	NaN
	0.143069	NaN	NaN	NaN	NaN	NaN	NaN	NaN	NaN	NaN
	0.150972	NaN	NaN	NaN	NaN	NaN	NaN	NaN	NaN	NaN
	0.0114914	NaN	NaN	NaN	NaN	NaN	NaN	NaN	NaN	NaN
	0.113956	NaN	NaN	NaN	NaN	NaN	NaN	NaN	NaN	NaN
	-0.000662022	NaN	NaN	NaN	NaN	NaN	NaN	NaN	NaN	NaN
	0.0551637	NaN	NaN	NaN	NaN	NaN	NaN	NaN	NaN	NaN
	0.138481	NaN	NaN	NaN	NaN	NaN	NaN	NaN	NaN	NaN
	0.205172	NaN	NaN	NaN	NaN	NaN	NaN	NaN	NaN	NaN
	0.0552169	NaN	NaN	NaN	NaN	NaN	NaN	NaN	NaN	NaN
	0.0546322	NaN	NaN	NaN	NaN	NaN	NaN	NaN	NaN	NaN
	0.0657561	NaN	NaN	NaN	NaN	NaN	NaN	NaN	NaN	NaN
	-0.300869	NaN	NaN	NaN	NaN	NaN	NaN	NaN	NaN	NaN
	-0.0430848	NaN	NaN	NaN	NaN	NaN	NaN	NaN	NaN	NaN
	0.0401889	NaN	NaN	NaN	NaN	NaN	NaN	NaN	NaN	NaN
	0.0722243	NaN	NaN	NaN	NaN	NaN	NaN	NaN	NaN	NaN
	-0.125864	NaN	NaN	NaN	NaN	NaN	NaN	NaN	NaN	NaN
	0.0731106	NaN	NaN	NaN	NaN	NaN	NaN	NaN	NaN	NaN
	0.251162	NaN	NaN	NaN	NaN	NaN	NaN	NaN	NaN	NaN
	-0.0625843	NaN	NaN	NaN	NaN	NaN	NaN	NaN	NaN	NaN
	0.208708	NaN	NaN	NaN	NaN	NaN	NaN	NaN	NaN	NaN
	-0.0182271	NaN	NaN	NaN	NaN	NaN	NaN	NaN	NaN	NaN
	0.0638434	NaN	NaN	NaN	NaN	NaN	NaN	NaN	NaN	NaN
	-0.00819873	NaN	NaN	NaN	NaN	NaN	NaN	NaN	NaN	NaN
	-0.0282224	NaN	NaN	NaN	NaN	NaN	NaN	NaN	NaN	NaN
	-0.103074	NaN	NaN	NaN	NaN	NaN	NaN	NaN	NaN	NaN
	0.16245	NaN	NaN	NaN	NaN	NaN	NaN	NaN	NaN	NaN
	0.115421	NaN	NaN	NaN	NaN	NaN	NaN	NaN	NaN	NaN
	-0.067032	NaN	NaN	NaN	NaN	NaN	NaN	NaN	NaN	NaN
	0.130233	NaN	NaN	NaN	NaN	NaN	NaN	NaN	NaN	NaN
	0.0467727	NaN	NaN	NaN	NaN	NaN	NaN	NaN	NaN	NaN
	0.0377562	NaN	NaN	NaN	NaN	NaN	NaN	NaN	NaN	NaN
	-0.0236205	NaN	NaN	NaN	NaN	NaN	NaN	NaN	NaN	NaN
	0.0826369	NaN	NaN	NaN	NaN	NaN	NaN	NaN	NaN	NaN
	-0.244758	NaN	NaN	NaN	NaN	NaN	NaN	NaN	NaN	NaN
	0.209107	NaN	NaN	NaN	NaN	NaN	NaN	NaN	NaN	NaN
	0.0230116	NaN	NaN	NaN	NaN	NaN	NaN	NaN	NaN	NaN
	0.34984	NaN	NaN	NaN	NaN	NaN	NaN	NaN	NaN	NaN
	-0.113192	NaN	NaN	NaN	NaN	NaN	NaN	NaN	NaN	NaN
	0.000158254	NaN	NaN	NaN	NaN	NaN	NaN	NaN	NaN	NaN
	0.0706173	NaN	NaN	NaN	NaN	NaN	NaN	NaN	NaN	NaN
	0.0293711	NaN	NaN	NaN	NaN	NaN	NaN	NaN	NaN	NaN
	0.019752	NaN	NaN	NaN	NaN	NaN	NaN	NaN	NaN	NaN
	-0.19881	NaN	NaN	NaN	NaN	NaN	NaN	NaN	NaN	NaN
	0.11465	NaN	NaN	NaN	NaN	NaN	NaN	NaN	NaN	NaN
	0.0103398	NaN	NaN	NaN	NaN	NaN	NaN	NaN	NaN	NaN
	0.441683	NaN	NaN	NaN	NaN	NaN	NaN	NaN	NaN	NaN
	-0.155578	NaN	NaN	NaN	NaN	NaN	NaN	NaN	NaN	NaN
	-0.289366	NaN	NaN	NaN	NaN	NaN	NaN	NaN	NaN	NaN
	0.120584	NaN	NaN	NaN	NaN	NaN	NaN	NaN	NaN	NaN
	-0.0384576	NaN	NaN	NaN	NaN	NaN	NaN	NaN	NaN	NaN
	0.204933	NaN	NaN	NaN	NaN	NaN	NaN	NaN	NaN	NaN
	-0.131014	NaN	NaN	NaN	NaN	NaN	NaN	NaN	NaN	NaN
	0.30855	NaN	NaN	NaN	NaN	NaN	NaN	NaN	NaN	NaN
	-0.18671	NaN	NaN	NaN	NaN	NaN	NaN	NaN	NaN	NaN
	-0.082271	NaN	NaN	NaN	NaN	NaN	NaN	NaN	NaN	NaN
	0.0770265	NaN	NaN	NaN	NaN	NaN	NaN	NaN	NaN	NaN
	-0.0158598	NaN	NaN	NaN	NaN	NaN	NaN	NaN	NaN	NaN
	0.0461522	NaN	NaN	NaN	NaN	NaN	NaN	NaN	NaN	NaN
	-0.288949	NaN	NaN	NaN	NaN	NaN	NaN	NaN	NaN	NaN
	0.0744894	NaN	NaN	NaN	NaN	NaN	NaN	NaN	NaN	NaN
	-0.0512465	NaN	NaN	NaN	NaN	NaN	NaN	NaN	NaN	NaN
	-0.247397	NaN	NaN	NaN	NaN	NaN	NaN	NaN	NaN	NaN
	-0.0341912	NaN	NaN	NaN	NaN	NaN	NaN	NaN	NaN	NaN
	-0.123959	NaN	NaN	NaN	NaN	NaN	NaN	NaN	NaN	NaN
	-0.437535	NaN	NaN	NaN	NaN	NaN	NaN	NaN	NaN	NaN
	-0.0885751	NaN	NaN	NaN	NaN	NaN	NaN	NaN	NaN	NaN
	-0.0414912	NaN	NaN	NaN	NaN	NaN	NaN	NaN	NaN	NaN
	-0.199417	NaN	NaN	NaN	NaN	NaN	NaN	NaN	NaN	NaN
	0.113175	NaN	NaN	NaN	NaN	NaN	NaN	NaN	NaN	NaN
	0.0292082	NaN	NaN	NaN	NaN	NaN	NaN	NaN	NaN	NaN
	-0.13804	NaN	NaN	NaN	NaN	NaN	NaN	NaN	NaN	NaN
	0.0562411	NaN	NaN	NaN	NaN	NaN	NaN	NaN	NaN	NaN
	0.0688803	NaN	NaN	NaN	NaN	NaN	NaN	NaN	NaN	NaN
	-0.182014	NaN	NaN	NaN	NaN	NaN	NaN	NaN	NaN	NaN
	0.00531486	NaN	NaN	NaN	NaN	NaN	NaN	NaN	NaN	NaN
	0.307626	NaN	NaN	NaN	NaN	NaN	NaN	NaN	NaN	NaN
	-0.174259	NaN	NaN	NaN	NaN	NaN	NaN	NaN	NaN	NaN
	-0.128933	NaN	NaN	NaN	NaN	NaN	NaN	NaN	NaN	NaN
	-0.216151	NaN	NaN	NaN	NaN	NaN	NaN	NaN	NaN	NaN
	-0.0898461	NaN	NaN	NaN	NaN	NaN	NaN	NaN	NaN	NaN
	-0.0636976	NaN	NaN	NaN	NaN	NaN	NaN	NaN	NaN	NaN
	-0.0895018	NaN	NaN	NaN	NaN	NaN	NaN	NaN	NaN	NaN
	-0.111244	NaN	NaN	NaN	NaN	NaN	NaN	NaN	NaN	NaN
	-0.0881743	NaN	NaN	NaN	NaN	NaN	NaN	NaN	NaN	NaN
	-0.419704	NaN	NaN	NaN	NaN	NaN	NaN	NaN	NaN	NaN
	0.0454823	NaN	NaN	NaN	NaN	NaN	NaN	NaN	NaN	NaN
	0.12394	NaN	NaN	NaN	NaN	NaN	NaN	NaN	NaN	NaN
	0.0331521	NaN	NaN	NaN	NaN	NaN	NaN	NaN	NaN	NaN
	-0.00275036	NaN	NaN	NaN	NaN	NaN	NaN	NaN	NaN	NaN
	-0.100237	NaN	NaN	NaN	NaN	NaN	NaN	NaN	NaN	NaN
	0.104035	NaN	NaN	NaN	NaN	NaN	NaN	NaN	NaN	NaN
	0.107663	NaN	NaN	NaN	NaN	NaN	NaN	NaN	NaN	NaN
	0.0012278	NaN	NaN	NaN	NaN	NaN	NaN	NaN	NaN	NaN
	0.0829062	NaN	NaN	NaN	NaN	NaN	NaN	NaN	NaN	NaN
	0.0289653	NaN	NaN	NaN	NaN	NaN	NaN	NaN	NaN	NaN
	0.378566	NaN	NaN	NaN	NaN	NaN	NaN	NaN	NaN	NaN
	0.0163311	NaN	NaN	NaN	NaN	NaN	NaN	NaN	NaN	NaN
	-0.313475	NaN	NaN	NaN	NaN	NaN	NaN	NaN	NaN	NaN
	0.170201	NaN	NaN	NaN	NaN	NaN	NaN	NaN	NaN	NaN
	-0.085406	NaN	NaN	NaN	NaN	NaN	NaN	NaN	NaN	NaN
	-0.0981799	NaN	NaN	NaN	NaN	NaN	NaN	NaN	NaN	NaN
	0.0379935	NaN	NaN	NaN	NaN	NaN	NaN	NaN	NaN	NaN
	0.369701	NaN	NaN	NaN	NaN	NaN	NaN	NaN	NaN	NaN
	0.195916	NaN	NaN	NaN	NaN	NaN	NaN	NaN	NaN	NaN
	-0.806471	NaN	NaN	NaN	NaN	NaN	NaN	NaN	NaN	NaN
	-0.0965719	NaN	NaN	NaN	NaN	NaN	NaN	NaN	NaN	NaN
	-0.0489497	NaN	NaN	NaN	NaN	NaN	NaN	NaN	NaN	NaN
	0.0320514	NaN	NaN	NaN	NaN	NaN	NaN	NaN	NaN	NaN
	-0.635863	NaN	NaN	NaN	NaN	NaN	NaN	NaN	NaN	NaN
	0.250645	NaN	NaN	NaN	NaN	NaN	NaN	NaN	NaN	NaN
	0.0426081	NaN	NaN	NaN	NaN	NaN	NaN	NaN	NaN	NaN
	-0.282432	NaN	NaN	NaN	NaN	NaN	NaN	NaN	NaN	NaN
	-0.0127105	NaN	NaN	NaN	NaN	NaN	NaN	NaN	NaN	NaN
	-0.247313	NaN	NaN	NaN	NaN	NaN	NaN	NaN	NaN	NaN
	0.267563	NaN	NaN	NaN	NaN	NaN	NaN	NaN	NaN	NaN
	0.255773	NaN	NaN	NaN	NaN	NaN	NaN	NaN	NaN	NaN
	0.00302795	NaN	NaN	NaN	NaN	NaN	NaN	NaN	NaN	NaN
	0.0545918	NaN	NaN	NaN	NaN	NaN	NaN	NaN	NaN	NaN
	0.0946427	NaN	NaN	NaN	NaN	NaN	NaN	NaN	NaN	NaN
	0.0816136	NaN	NaN	NaN	NaN	NaN	NaN	NaN	NaN	NaN
	0.0333292	NaN	NaN	NaN	NaN	NaN	NaN	NaN	NaN	NaN
	-0.253067	NaN	NaN	NaN	NaN	NaN	NaN	NaN	NaN	NaN
	-0.338253	NaN	NaN	NaN	NaN	NaN	NaN	NaN	NaN	NaN
	0.0143217	NaN	NaN	NaN	NaN	NaN	NaN	NaN	NaN	NaN
	0.114771	NaN	NaN	NaN	NaN	NaN	NaN	NaN	NaN	NaN
	0.105743	NaN	NaN	NaN	NaN	NaN	NaN	NaN	NaN	NaN
	0.163751	NaN	NaN	NaN	NaN	NaN	NaN	NaN	NaN	NaN
	-0.0293867	NaN	NaN	NaN	NaN	NaN	NaN	NaN	NaN	NaN
	-0.0499866	NaN	NaN	NaN	NaN	NaN	NaN	NaN	NaN	NaN
	0.00498723	NaN	NaN	NaN	NaN	NaN	NaN	NaN	NaN	NaN
	0.209197	NaN	NaN	NaN	NaN	NaN	NaN	NaN	NaN	NaN
	-0.120105	NaN	NaN	NaN	NaN	NaN	NaN	NaN	NaN	NaN
	0.132801	NaN	NaN	NaN	NaN	NaN	NaN	NaN	NaN	NaN
	0.0684944	NaN	NaN	NaN	NaN	NaN	NaN	NaN	NaN	NaN
	-0.0637278	NaN	NaN	NaN	NaN	NaN	NaN	NaN	NaN	NaN
	0.0186738	NaN	NaN	NaN	NaN	NaN	NaN	NaN	NaN	NaN
	0.244872	NaN	NaN	NaN	NaN	NaN	NaN	NaN	NaN	NaN
	-0.0971226	NaN	NaN	NaN	NaN	NaN	NaN	NaN	NaN	NaN
	0.144293	NaN	NaN	NaN	NaN	NaN	NaN	NaN	NaN	NaN
	-0.135679	NaN	NaN	NaN	NaN	NaN	NaN	NaN	NaN	NaN
	-0.0624712	NaN	NaN	NaN	NaN	NaN	NaN	NaN	NaN	NaN
	0.027999	NaN	NaN	NaN	NaN	NaN	NaN	NaN	NaN	NaN
	-0.0525516	NaN	NaN	NaN	NaN	NaN	NaN	NaN	NaN	NaN
	0.0762842	NaN	NaN	NaN	NaN	NaN	NaN	NaN	NaN	NaN
	0.163852	NaN	NaN	NaN	NaN	NaN	NaN	NaN	NaN	NaN
	-0.0900555	NaN	NaN	NaN	NaN	NaN	NaN	NaN	NaN	NaN
	0.0260985	NaN	NaN	NaN	NaN	NaN	NaN	NaN	NaN	NaN
	-0.09158	NaN	NaN	NaN	NaN	NaN	NaN	NaN	NaN	NaN
	-0.127834	NaN	NaN	NaN	NaN	NaN	NaN	NaN	NaN	NaN
	-0.0680395	NaN	NaN	NaN	NaN	NaN	NaN	NaN	NaN	NaN
	0.0555992	NaN	NaN	NaN	NaN	NaN	NaN	NaN	NaN	NaN
	0.169213	NaN	NaN	NaN	NaN	NaN	NaN	NaN	NaN	NaN
	-0.0547022	NaN	NaN	NaN	NaN	NaN	NaN	NaN	NaN	NaN
	0.0897557	NaN	NaN	NaN	NaN	NaN	NaN	NaN	NaN	NaN
	0.090893	NaN	NaN	NaN	NaN	NaN	NaN	NaN	NaN	NaN
	0.126166	NaN	NaN	NaN	NaN	NaN	NaN	NaN	NaN	NaN
	0.0217439	NaN	NaN	NaN	NaN	NaN	NaN	NaN	NaN	NaN
	0.0431014	NaN	NaN	NaN	NaN	NaN	NaN	NaN	NaN	NaN
	-0.164236	NaN	NaN	NaN	NaN	NaN	NaN	NaN	NaN	NaN
	0.229765	NaN	NaN	NaN	NaN	NaN	NaN	NaN	NaN	NaN
	0.0920806	NaN	NaN	NaN	NaN	NaN	NaN	NaN	NaN	NaN
	-0.11335	NaN	NaN	NaN	NaN	NaN	NaN	NaN	NaN	NaN
	0.211285	NaN	NaN	NaN	NaN	NaN	NaN	NaN	NaN	NaN
	0.117808	NaN	NaN	NaN	NaN	NaN	NaN	NaN	NaN	NaN
	-0.125697	NaN	NaN	NaN	NaN	NaN	NaN	NaN	NaN	NaN
	-0.146928	NaN	NaN	NaN	NaN	NaN	NaN	NaN	NaN	NaN
	0.0687949	NaN	NaN	NaN	NaN	NaN	NaN	NaN	NaN	NaN
	0.177532	NaN	NaN	NaN	NaN	NaN	NaN	NaN	NaN	NaN
	0.0710383	NaN	NaN	NaN	NaN	NaN	NaN	NaN	NaN	NaN
	-0.233862	NaN	NaN	NaN	NaN	NaN	NaN	NaN	NaN	NaN
	0.148237	NaN	NaN	NaN	NaN	NaN	NaN	NaN	NaN	NaN
	-0.14003	NaN	NaN	NaN	NaN	NaN	NaN	NaN	NaN	NaN
	0.118276	NaN	NaN	NaN	NaN	NaN	NaN	NaN	NaN	NaN
	0.15416	NaN	NaN	NaN	NaN	NaN	NaN	NaN	NaN	NaN
	0.269591	NaN	NaN	NaN	NaN	NaN	NaN	NaN	NaN	NaN
	0.0284884	NaN	NaN	NaN	NaN	NaN	NaN	NaN	NaN	NaN
	NaN	NaN	NaN	NaN	NaN	NaN	NaN	NaN	NaN	NaN
	0.0193603	NaN	NaN	NaN	NaN	NaN	NaN	NaN	NaN	NaN
	0.0284982	NaN	NaN	NaN	NaN	NaN	NaN	NaN	NaN	NaN
	0.0524356	NaN	NaN	NaN	NaN	NaN	NaN	NaN	NaN	NaN
	0.144648	NaN	NaN	NaN	NaN	NaN	NaN	NaN	NaN	NaN
	0.195477	NaN	NaN	NaN	NaN	NaN	NaN	NaN	NaN	NaN
	0.0371887	NaN	NaN	NaN	NaN	NaN	NaN	NaN	NaN	NaN
	-0.00641255	NaN	NaN	NaN	NaN	NaN	NaN	NaN	NaN	NaN
	0.192733	NaN	NaN	NaN	NaN	NaN	NaN	NaN	NaN	NaN
	0.0432091	NaN	NaN	NaN	NaN	NaN	NaN	NaN	NaN	NaN
	0.00400112	NaN	NaN	NaN	NaN	NaN	NaN	NaN	NaN	NaN
	-0.0645783	NaN	NaN	NaN	NaN	NaN	NaN	NaN	NaN	NaN
	0.176421	NaN	NaN	NaN	NaN	NaN	NaN	NaN	NaN	NaN
	-0.0596834	NaN	NaN	NaN	NaN	NaN	NaN	NaN	NaN	NaN
	0.0781511	NaN	NaN	NaN	NaN	NaN	NaN	NaN	NaN	NaN
	0.0184031	NaN	NaN	NaN	NaN	NaN	NaN	NaN	NaN	NaN
	0.093469	NaN	NaN	NaN	NaN	NaN	NaN	NaN	NaN	NaN
	0.217326	NaN	NaN	NaN	NaN	NaN	NaN	NaN	NaN	NaN
	0.00207654	NaN	NaN	NaN	NaN	NaN	NaN	NaN	NaN	NaN
	-0.162858	NaN	NaN	NaN	NaN	NaN	NaN	NaN	NaN	NaN
	-0.0554913	NaN	NaN	NaN	NaN	NaN	NaN	NaN	NaN	NaN
	-0.100749	NaN	NaN	NaN	NaN	NaN	NaN	NaN	NaN	NaN
	-0.0243848	NaN	NaN	NaN	NaN	NaN	NaN	NaN	NaN	NaN
	-0.19	NaN	NaN	NaN	NaN	NaN	NaN	NaN	NaN	NaN
	-0.138447	NaN	NaN	NaN	NaN	NaN	NaN	NaN	NaN	NaN
	-0.15644	NaN	NaN	NaN	NaN	NaN	NaN	NaN	NaN	NaN
	-0.25197	NaN	NaN	NaN	NaN	NaN	NaN	NaN	NaN	NaN
	0.221179	NaN	NaN	NaN	NaN	NaN	NaN	NaN	NaN	NaN
	NaN	NaN	NaN	NaN	NaN	NaN	NaN	NaN	NaN	NaN
	-0.0467424	NaN	NaN	NaN	NaN	NaN	NaN	NaN	NaN	NaN
	0.00437707	NaN	NaN	NaN	NaN	NaN	NaN	NaN	NaN	NaN
	-0.0949799	NaN	NaN	NaN	NaN	NaN	NaN	NaN	NaN	NaN
	-0.130565	NaN	NaN	NaN	NaN	NaN	NaN	NaN	NaN	NaN
	0.00101092	NaN	NaN	NaN	NaN	NaN	NaN	NaN	NaN	NaN
	0.255641	NaN	NaN	NaN	NaN	NaN	NaN	NaN	NaN	NaN
	0.0785965	NaN	NaN	NaN	NaN	NaN	NaN	NaN	NaN	NaN
	0.0859154	NaN	NaN	NaN	NaN	NaN	NaN	NaN	NaN	NaN
	0.0811343	NaN	NaN	NaN	NaN	NaN	NaN	NaN	NaN	NaN
	-0.00201599	NaN	NaN	NaN	NaN	NaN	NaN	NaN	NaN	NaN
	0.172051	NaN	NaN	NaN	NaN	NaN	NaN	NaN	NaN	NaN
	-0.0951801	NaN	NaN	NaN	NaN	NaN	NaN	NaN	NaN	NaN
	-0.0263648	NaN	NaN	NaN	NaN	NaN	NaN	NaN	NaN	NaN
	-0.0806635	NaN	NaN	NaN	NaN	NaN	NaN	NaN	NaN	NaN
	-0.2021	NaN	NaN	NaN	NaN	NaN	NaN	NaN	NaN	NaN
	0.264711	NaN	NaN	NaN	NaN	NaN	NaN	NaN	NaN	NaN
	-0.101137	NaN	NaN	NaN	NaN	NaN	NaN	NaN	NaN	NaN
	-0.00193305	NaN	NaN	NaN	NaN	NaN	NaN	NaN	NaN	NaN
	0.12883	NaN	NaN	NaN	NaN	NaN	NaN	NaN	NaN	NaN
	0.475334	NaN	NaN	NaN	NaN	NaN	NaN	NaN	NaN	NaN
	0.0650982	NaN	NaN	NaN	NaN	NaN	NaN	NaN	NaN	NaN
	0.0355991	NaN	NaN	NaN	NaN	NaN	NaN	NaN	NaN	NaN
	-0.283315	NaN	NaN	NaN	NaN	NaN	NaN	NaN	NaN	NaN
	-0.320454	NaN	NaN	NaN	NaN	NaN	NaN	NaN	NaN	NaN
	-0.143082	NaN	NaN	NaN	NaN	NaN	NaN	NaN	NaN	NaN
	0.117055	NaN	NaN	NaN	NaN	NaN	NaN	NaN	NaN	NaN
	0.244415	NaN	NaN	NaN	NaN	NaN	NaN	NaN	NaN	NaN
	-0.103551	NaN	NaN	NaN	NaN	NaN	NaN	NaN	NaN	NaN
	0.0997062	NaN	NaN	NaN	NaN	NaN	NaN	NaN	NaN	NaN
	0.210469	NaN	NaN	NaN	NaN	NaN	NaN	NaN	NaN	NaN
	0.428282	NaN	NaN	NaN	NaN	NaN	NaN	NaN	NaN	NaN
	-0.343387	NaN	NaN	NaN	NaN	NaN	NaN	NaN	NaN	NaN
	0.225397	NaN	NaN	NaN	NaN	NaN	NaN	NaN	NaN	NaN
	-0.0540922	NaN	NaN	NaN	NaN	NaN	NaN	NaN	NaN	NaN
	0.0036834	NaN	NaN	NaN	NaN	NaN	NaN	NaN	NaN	NaN
	-0.305784	NaN	NaN	NaN	NaN	NaN	NaN	NaN	NaN	NaN
	0.0486487	NaN	NaN	NaN	NaN	NaN	NaN	NaN	NaN	NaN
	0.206018	NaN	NaN	NaN	NaN	NaN	NaN	NaN	NaN	NaN
	0.0723448	NaN	NaN	NaN	NaN	NaN	NaN	NaN	NaN	NaN
	-0.0990356	NaN	NaN	NaN	NaN	NaN	NaN	NaN	NaN	NaN
	0.0995645	NaN	NaN	NaN	NaN	NaN	NaN	NaN	NaN	NaN
	-0.00660637	NaN	NaN	NaN	NaN	NaN	NaN	NaN	NaN	NaN
	0.243035	NaN	NaN	NaN	NaN	NaN	NaN	NaN	NaN	NaN
	-0.120693	NaN	NaN	NaN	NaN	NaN	NaN	NaN	NaN	NaN
	-0.0666278	NaN	NaN	NaN	NaN	NaN	NaN	NaN	NaN	NaN
	0.23541	NaN	NaN	NaN	NaN	NaN	NaN	NaN	NaN	NaN
	-0.116534	NaN	NaN	NaN	NaN	NaN	NaN	NaN	NaN	NaN
	0.0145159	NaN	NaN	NaN	NaN	NaN	NaN	NaN	NaN	NaN
	0.0127985	NaN	NaN	NaN	NaN	NaN	NaN	NaN	NaN	NaN
	-0.116942	NaN	NaN	NaN	NaN	NaN	NaN	NaN	NaN	NaN
	0.217363	NaN	NaN	NaN	NaN	NaN	NaN	NaN	NaN	NaN
	-0.120133	NaN	NaN	NaN	NaN	NaN	NaN	NaN	NaN	NaN
	0.0148702	NaN	NaN	NaN	NaN	NaN	NaN	NaN	NaN	NaN
	-0.0424379	NaN	NaN	NaN	NaN	NaN	NaN	NaN	NaN	NaN
	0.0636921	NaN	NaN	NaN	NaN	NaN	NaN	NaN	NaN	NaN
	-0.33309	NaN	NaN	NaN	NaN	NaN	NaN	NaN	NaN	NaN
	-0.127445	NaN	NaN	NaN	NaN	NaN	NaN	NaN	NaN	NaN
	-0.104654	NaN	NaN	NaN	NaN	NaN	NaN	NaN	NaN	NaN
	0.0717627	NaN	NaN	NaN	NaN	NaN	NaN	NaN	NaN	NaN
	-0.160504	NaN	NaN	NaN	NaN	NaN	NaN	NaN	NaN	NaN
	0.0214417	NaN	NaN	NaN	NaN	NaN	NaN	NaN	NaN	NaN
	-0.435466	NaN	NaN	NaN	NaN	NaN	NaN	NaN	NaN	NaN
	-0.0398474	NaN	NaN	NaN	NaN	NaN	NaN	NaN	NaN	NaN
	-0.10455	NaN	NaN	NaN	NaN	NaN	NaN	NaN	NaN	NaN
	0.0865664	NaN	NaN	NaN	NaN	NaN	NaN	NaN	NaN	NaN
	0.12592	NaN	NaN	NaN	NaN	NaN	NaN	NaN	NaN	NaN
	0.135016	NaN	NaN	NaN	NaN	NaN	NaN	NaN	NaN	NaN
	0.0189037	NaN	NaN	NaN	NaN	NaN	NaN	NaN	NaN	NaN
	-0.0836174	NaN	NaN	NaN	NaN	NaN	NaN	NaN	NaN	NaN
	-0.0811083	NaN	NaN	NaN	NaN	NaN	NaN	NaN	NaN	NaN
	0.170057	NaN	NaN	NaN	NaN	NaN	NaN	NaN	NaN	NaN
	-0.062229	NaN	NaN	NaN	NaN	NaN	NaN	NaN	NaN	NaN
	0.00337532	NaN	NaN	NaN	NaN	NaN	NaN	NaN	NaN	NaN
	0.03399	NaN	NaN	NaN	NaN	NaN	NaN	NaN	NaN	NaN
	0.0701481	NaN	NaN	NaN	NaN	NaN	NaN	NaN	NaN	NaN
	0.0387635	NaN	NaN	NaN	NaN	NaN	NaN	NaN	NaN	NaN
	-0.190976	NaN	NaN	NaN	NaN	NaN	NaN	NaN	NaN	NaN
	-0.0671563	NaN	NaN	NaN	NaN	NaN	NaN	NaN	NaN	NaN
	-0.0127498	NaN	NaN	NaN	NaN	NaN	NaN	NaN	NaN	NaN
	-0.326636	NaN	NaN	NaN	NaN	NaN	NaN	NaN	NaN	NaN
	0.11947	NaN	NaN	NaN	NaN	NaN	NaN	NaN	NaN	NaN
	-0.00310618	NaN	NaN	NaN	NaN	NaN	NaN	NaN	NaN	NaN
	0.0652122	NaN	NaN	NaN	NaN	NaN	NaN	NaN	NaN	NaN
	-0.0201274	NaN	NaN	NaN	NaN	NaN	NaN	NaN	NaN	NaN
	0.148692	NaN	NaN	NaN	NaN	NaN	NaN	NaN	NaN	NaN
	0.274298	NaN	NaN	NaN	NaN	NaN	NaN	NaN	NaN	NaN
	-0.104185	NaN	NaN	NaN	NaN	NaN	NaN	NaN	NaN	NaN
	0.057696	NaN	NaN	NaN	NaN	NaN	NaN	NaN	NaN	NaN
	0.0872938	NaN	NaN	NaN	NaN	NaN	NaN	NaN	NaN	NaN

## Sheet: Airflow shuffled
	ufm	step down	flat	short	complex	chevron	twostep	multi	step up	dfm
	-0.211396	-0.0960728	0.0459044	0.0849353	0.0451581	0.0189157	0.00752204	0.019607	0.0512448	0.0655051
	-0.0240376	-0.0167244	-0.0553568	0.104491	-0.129623	0.263858	0.0421017	0.103219	0.0537088	-0.118214
	0.133706	-0.0809272	-0.146567	0.173254	0.0331156	-0.0570049	0.00414076	0.0590041	0.0954759	0.107594
	-0.139733	0.0376178	-0.0725334	-0.0799387	-0.00029627	-0.00194598	-0.0414469	-0.0362938	0.127404	-0.111812
	-0.0172113	0.00289025	-0.144517	-0.201408	0.0602607	0.165817	0.122072	0.00369571	0.269923	0.0872534
	-0.286823	-0.115511	0.0500458	0.28286	0.040104	0.222126	0.119057	-0.0405303	-0.0922676	-0.00811209
	-0.0725251	0.242728	0.0266818	-0.191714	0.135392	-0.0374429	-0.111703	0.12816	-0.0583846	-0.10223
	0.203516	0.0281777	0.081857	-0.122795	-0.00886621	-0.0143961	-0.00890012	-0.0606961	-0.0171446	-0.0676487
	-0.0982887	0.00471303	0.053967	0.17869	0.0460615	0.115249	-0.0152026	0.0119699	0.022096	-0.0599336
	0.0534015	-0.0396483	0.0466457	-0.0739826	-0.0718275	5.53423e-05	-0.0302633	-0.0873037	0.0116182	0.287217
	-0.179597	0.12722	0.0868838	-0.0282813	-0.0241534	-0.000998749	-0.0358255	-0.168234	0.0987551	-0.173923
	0.139719	0.128888	-0.0909814	-0.339591	0.00840742	0.0558122	-0.0491702	-0.052137	-0.0361844	0.0278056
	0.16827	-0.000641492	-0.0473001	0.0660173	0.0371041	-0.1068	0.0266246	0.0115092	0.0201613	0.140077
	0.128662	-0.341285	-0.0817424	0.116793	-0.0964846	-0.140937	-0.10882	0.0441684	0.0156874	0.199724
	0.263322	0.0919338	0.0555753	0.161366	0.151532	-0.0923859	0.00932476	0.00889798	0.0551018	-0.163179
	-0.113854	-0.220216	0.186887	-0.337287	-0.0268945	-0.0906865	-0.0366525	-0.00711489	0.00194649	-0.123022
	0.136302	0.0739605	-0.242499	0.0702131	0.0215559	-0.0430267	-0.00915755	-0.0382781	-0.071823	0.011011
	-0.144868	0.0585905	-0.11599	-0.116175	0.0292363	-0.0687901	0.0519896	-0.0160649	-0.107594	0.171227
	0.0507917	0.0574598	-0.0506313	0.266193	-0.016161	0.0506144	0.234175	-0.0374103	0.0400058	-0.287485
	-0.175726	0.0481114	-0.246139	0.25718	0.0525233	0.0586793	-0.00060939	-0.0887457	-0.36646	0.0899175
	-0.0536663	-0.0616951	0.254015	0.275853	-0.10016	0.136522	-0.0379356	0.0358107	-0.0886391	-0.0482404
	-0.0939056	-0.224725	-0.0292494	0.300041	-0.106328	0.0879883	-0.0781654	0.0606413	0.0419593	-0.110199
	-0.448442	-0.0860295	-0.123772	-0.320927	0.0320134	0.022787	-0.0832953	-0.000757961	0.0970526	0.135913
	-0.0964053	-0.0272	0.0306647	0.106555	0.0477849	0.043923	NaN	-0.0253274	0.164492	0.113956
	0.069321	0.0933962	-0.0505089	-0.30058	0.0231783	0.0447342	NaN	-0.0691172	0.312299	0.0498607
	0.149073	0.140161	-0.116589	0.613891	0.0277339	0.105608	NaN	0.119973	0.0394155	0.069474
	0.17953	0.0169562	-0.0636132	0.0474143	-0.213194	-0.0247013	NaN	-0.0240728	0.0446215	0.156064
	0.00433425	-0.00176564	-0.0936594	-0.143485	0.0203662	0.100533	NaN	-0.0777745	-0.0507848	-0.0172998
	-0.0126526	0.0299866	0.264199	0.0174247	-0.0936983	0.0304508	NaN	-0.0457997	-0.0183845	0.0235698
	-0.0164139	-0.000526754	0.044787	-0.0581603	-0.0356921	-0.068619	NaN	-0.0454876	-0.142539	0.0129623
	0.028864	0.453503	0.25018	0.0217417	0.0730103	0.190783	NaN	0.0698956	-0.0238866	0.234059
	-0.0640706	0.106567	-0.018406	-0.0735862	-0.0375762	0.160307	NaN	-0.0902336	0.0729925	-0.056213
	0.247983	-0.0873794	-0.176616	0.433041	0.0299027	0.29349	NaN	NaN	-0.097212	0.0464689
	-0.172737	-0.0405984	-0.2142	-0.122309	0.0868567	-0.193671	NaN	NaN	-0.0449792	-0.131859
	-0.127036	-0.292298	0.140464	0.235535	-0.0630593	-0.0263353	NaN	NaN	-0.00267091	-0.117573
	-0.0768403	-0.0418685	0.0933438	-0.217343	0.035752	0.0949534	NaN	NaN	0.0474063	-0.104103
	-0.198577	-0.112879	0.177467	-0.383846	-0.0137875	0.00274396	NaN	NaN	-0.0506241	0.120594
	0.00810858	-0.0946262	-0.06877	-0.116856	-0.0861279	0.124115	NaN	NaN	0.11172	-0.0496383
	0.320145	0.131328	0.467876	-0.00786582	0.0875465	-0.0545575	NaN	NaN	0.0357108	-0.180048
	-0.0395655	-0.0636189	0.0855241	-0.36247	0.0699726	0.0393561	NaN	NaN	-0.0249388	-0.0118849
	0.0130317	-0.0963902	0.170459	-0.101193	-0.0155628	0.0199045	NaN	NaN	-0.00312182	-0.0167578
	0.0955705	-0.0380146	-0.185902	0.108765	0.0859589	0.0426527	NaN	NaN	-0.0212228	0.0633538
	-0.104364	0.290826	-0.220534	-0.312298	0.074484	0.0257173	NaN	NaN	-0.0538366	-0.0612535
	0.426837	-0.0797825	-0.104858	0.0763757	-0.196884	-0.0141499	NaN	NaN	0.100418	0.112568
	0.200417	-0.187833	-0.193779	-0.601047	-0.0775676	-0.0663128	NaN	NaN	0.169983	-0.0836344
	-0.00585131	-0.000457513	-0.069864	0.0901219	-0.0983666	-0.00657162	NaN	NaN	-0.00507692	0.0933426
	0.251349	0.0740196	0.107847	0.0108106	-0.297078	0.107545	NaN	NaN	0.00665795	0.117635
	0.0206347	0.142408	0.018206	-0.0284956	-0.0521859	-0.0755629	NaN	NaN	-0.0826326	-0.0793869
	0.290178	-0.0434239	0.113357	0.0230709	0.000922323	-0.00746005	NaN	NaN	-0.117408	0.131014
	-0.0285127	0.0452579	-0.120301	-0.0615242	0.0274589	-0.29516	NaN	NaN	0.0180674	-0.00511092
	0.0722135	0.133112	0.013115	0.0594909	-0.0225456	0.17159	NaN	NaN	NaN	0.123746
	-0.115848	-0.0779203	-0.176766	-0.11346	-0.100867	0.0117553	NaN	NaN	NaN	0.0049371
	-0.212624	0.155849	-0.168851	-0.177884	0.0454753	-0.0633442	NaN	NaN	NaN	0.0310764
	0.00946274	0.0955956	0.0266297	-0.181157	-0.0166386	-0.0803433	NaN	NaN	NaN	NaN
	0.0071684	0.0126294	-0.0199761	-0.146325	0.00725011	-0.122065	NaN	NaN	NaN	NaN
	0.241447	0.119089	-0.243508	0.0887489	0.109289	-0.151621	NaN	NaN	NaN	NaN
	-0.149643	0.0938282	0.0171376	0.104593	-0.0527773	0.0318673	NaN	NaN	NaN	NaN
	0.0468974	0.0222321	-0.0437393	0.621837	-0.0403308	-0.244643	NaN	NaN	NaN	NaN
	0.011856	0.0207092	-0.142861	-0.140601	-0.0203041	0.045775	NaN	NaN	NaN	NaN
	0.00338419	-0.0672975	-0.0762474	0.294399	-0.0622845	-0.000471877	NaN	NaN	NaN	NaN
	0.117142	-0.015849	0.104966	0.0897493	0.157884	-0.0740228	NaN	NaN	NaN	NaN
	0.169426	0.00185331	-0.0607106	-0.192353	0.0982422	0.0113435	NaN	NaN	NaN	NaN
	0.109455	-0.0180882	-0.0573913	0.329417	0.0485415	-0.0679525	NaN	NaN	NaN	NaN
	-0.106172	-0.0154938	0.102058	0.0156489	-0.0313072	-0.0173032	NaN	NaN	NaN	NaN
	-0.106554	-0.151506	-0.0690456	-0.542796	-0.0284816	0.0193224	NaN	NaN	NaN	NaN
	0.0481827	0.192277	0.192958	0.144978	0.114927	0.116751	NaN	NaN	NaN	NaN
	-0.0937484	-0.329221	0.170834	0.144997	-0.0109938	-0.0343503	NaN	NaN	NaN	NaN
	-0.0745048	0.0789824	-0.532201	-0.201222	0.0607496	-0.0155454	NaN	NaN	NaN	NaN
	0.0315949	0.0717948	-0.224786	-0.0270573	-0.0305376	-0.0559423	NaN	NaN	NaN	NaN
	0.396631	0.00613326	0.105951	-0.308198	-0.0404365	-0.0268558	NaN	NaN	NaN	NaN
	-0.112474	0.0337375	0.0673523	-0.00273127	-0.050929	-0.037212	NaN	NaN	NaN	NaN
	-0.0161725	0.0295045	-0.123269	-0.0266656	-0.0554426	-0.0659822	NaN	NaN	NaN	NaN
	-0.0383368	-0.183139	-0.0375722	-0.0743603	0.0852153	0.000214288	NaN	NaN	NaN	NaN
	-0.252582	-0.0703458	0.000875341	-0.120367	-0.0460042	0.122669	NaN	NaN	NaN	NaN
	-0.497784	0.189806	0.0633169	0.0800327	0.122334	-0.0323152	NaN	NaN	NaN	NaN
	0.0138078	0.263408	-0.0839844	-0.220278	0.0475564	-0.016286	NaN	NaN	NaN	NaN
	0.0455197	0.13166	-0.0887368	-0.246208	0.0886207	-0.00174441	NaN	NaN	NaN	NaN
	0.0420663	0.0307502	0.14671	-0.167901	0.0616284	0.0995089	NaN	NaN	NaN	NaN
	0.143461	-0.0839418	0.0432361	0.0253742	0.0938629	0.0995602	NaN	NaN	NaN	NaN
	-0.0642772	-0.0307205	0.0915518	-0.606396	0.063317	0.246496	NaN	NaN	NaN	NaN
	-0.0698978	0.077254	-0.08443	0.0401653	0.0973421	-0.227502	NaN	NaN	NaN	NaN
	0.0445577	-0.0272173	0.249768	0.26768	0.0647427	-0.211428	NaN	NaN	NaN	NaN
	-0.0489615	0.124421	-0.0339372	0.0859954	0.0764513	-0.056779	NaN	NaN	NaN	NaN
	0.0851504	0.0317344	-0.0677724	0.0180228	-0.0270857	-0.0265831	NaN	NaN	NaN	NaN
	0.0372651	0.0884593	-0.244384	-0.572262	-0.0677143	0.0998128	NaN	NaN	NaN	NaN
	0.0817207	0.0214777	-0.165855	-0.100256	0.108219	0.196318	NaN	NaN	NaN	NaN
	-0.28126	-0.0201718	-0.0676573	0.106825	0.0489327	-0.0626419	NaN	NaN	NaN	NaN
	-0.208431	-0.0195694	-0.163063	-0.179689	-0.0284825	0.0688724	NaN	NaN	NaN	NaN
	0.0593753	0.00446333	-0.229675	0.0148364	0.00344222	0.0142739	NaN	NaN	NaN	NaN
	0.254445	0.147954	0.0266103	0.190141	-0.050727	-0.09397	NaN	NaN	NaN	NaN
	-0.465503	-0.0454647	-0.000743222	0.0140536	-0.0263796	-0.0585916	NaN	NaN	NaN	NaN
	-0.0461938	-0.0414376	0.12033	-0.0580989	0.028349	0.0422827	NaN	NaN	NaN	NaN
	0.0359547	0.344034	0.389813	-0.00457875	0.103757	-0.199946	NaN	NaN	NaN	NaN
	0.0652896	-0.00470458	0.202494	-0.0796421	-0.0153038	-0.0241941	NaN	NaN	NaN	NaN
	0.191597	0.0602472	-0.159784	-0.227603	0.0672036	0.0538594	NaN	NaN	NaN	NaN
	0.0524668	-0.0949992	0.111702	0.193382	0.071228	0.0903104	NaN	NaN	NaN	NaN
	0.0219276	0.0913684	0.0626778	0.192064	0.0478419	-0.00022782	NaN	NaN	NaN	NaN
	0.139997	0.0302829	-0.0152553	-0.118225	0.0512355	-0.106968	NaN	NaN	NaN	NaN
	0.0463277	-0.0319501	0.285813	0.0450523	0.0424456	-0.0806091	NaN	NaN	NaN	NaN
	0.304961	0.0277657	-0.0690676	0.1678	0.0100928	-0.120303	NaN	NaN	NaN	NaN
	-0.136938	0.0342487	-0.21892	0.0342408	0.061454	-0.0635679	NaN	NaN	NaN	NaN
	0.504601	0.171574	0.162995	-0.113488	0.0189136	NaN	NaN	NaN	NaN	NaN
	0.167154	-0.183785	0.0246756	-0.323445	0.134289	NaN	NaN	NaN	NaN	NaN
	-0.213567	0.0542356	-0.042605	0.140569	-0.0281494	NaN	NaN	NaN	NaN	NaN
	-0.0642192	-0.0848918	0.0464399	0.670377	-0.00808938	NaN	NaN	NaN	NaN	NaN
	-0.13142	0.0253133	0.0613816	-0.209667	0.0702602	NaN	NaN	NaN	NaN	NaN
	0.0183134	0.111317	-0.15691	-0.143283	0.00983597	NaN	NaN	NaN	NaN	NaN
	-0.0196639	0.0154251	-0.00885325	0.0312972	0.00656962	NaN	NaN	NaN	NaN	NaN
	-0.0766108	0.0365675	0.166076	-0.0526457	0.104909	NaN	NaN	NaN	NaN	NaN
	-0.0981039	0.0198378	-0.367437	-0.0724015	-0.0396644	NaN	NaN	NaN	NaN	NaN
	-0.164524	0.0580163	-0.0669936	-0.255399	-0.127684	NaN	NaN	NaN	NaN	NaN
	0.0677002	0.0860417	-0.0903108	-0.187888	-0.0555767	NaN	NaN	NaN	NaN	NaN
	0.148999	0.0634807	-0.0715819	-0.501902	0.00817441	NaN	NaN	NaN	NaN	NaN
	-0.135656	0.00453423	-0.278987	0.0417735	0.00987691	NaN	NaN	NaN	NaN	NaN
	0.0817674	-0.0699697	0.229955	0.23166	0.0698701	NaN	NaN	NaN	NaN	NaN
	0.0714511	0.091368	0.0257047	-0.0410916	-0.150187	NaN	NaN	NaN	NaN	NaN
	-0.113912	-0.0496767	0.117844	-0.00335598	0.0524917	NaN	NaN	NaN	NaN	NaN
	-0.116071	0.117171	-0.0700989	0.00506398	-0.0201147	NaN	NaN	NaN	NaN	NaN
	-0.194327	0.0416178	-0.102942	0.581139	-0.0276392	NaN	NaN	NaN	NaN	NaN
	-0.0987502	0.105308	-0.370103	0.0142281	0.013775	NaN	NaN	NaN	NaN	NaN
	0.177404	-0.133945	-0.0797961	0.166706	-0.0144502	NaN	NaN	NaN	NaN	NaN
	-0.132991	-0.00627466	-0.145417	0.062232	0.0167401	NaN	NaN	NaN	NaN	NaN
	-0.0140484	-0.0863619	-0.354373	-0.371806	0.0480364	NaN	NaN	NaN	NaN	NaN
	0.148471	0.106125	-0.100499	0.136927	-0.0804257	NaN	NaN	NaN	NaN	NaN
	-0.0381605	0.0341715	-0.0864392	-0.0394433	0.0227403	NaN	NaN	NaN	NaN	NaN
	-0.33201	-0.0356503	0.120337	-0.439476	-0.0106612	NaN	NaN	NaN	NaN	NaN
	-0.146821	0.0543745	-0.277457	-0.540046	0.11453	NaN	NaN	NaN	NaN	NaN
	-0.123597	-0.0942268	0.164803	-0.289428	-0.0356748	NaN	NaN	NaN	NaN	NaN
	-0.150709	0.150611	6.92771e-05	0.0881546	0.116038	NaN	NaN	NaN	NaN	NaN
	-0.0790862	0.035863	-0.354247	-0.0225446	0.0124757	NaN	NaN	NaN	NaN	NaN
	-0.161879	-0.0364094	-0.124888	0.259001	0.0901361	NaN	NaN	NaN	NaN	NaN
	-0.280356	-0.00211811	-0.0712462	-0.28471	0.0208975	NaN	NaN	NaN	NaN	NaN
	-0.15537	-0.109051	-0.0798782	-0.0466058	0.00555658	NaN	NaN	NaN	NaN	NaN
	-0.00768935	0.0395278	0.0266191	0.00765777	-0.043244	NaN	NaN	NaN	NaN	NaN
	0.00990304	-0.0694604	-0.144059	-0.254126	0.18003	NaN	NaN	NaN	NaN	NaN
	-0.0264381	0.0996087	-0.113598	-0.238166	-0.0306926	NaN	NaN	NaN	NaN	NaN
	-0.0467212	-0.173808	0.0898096	-0.0268784	0.0496768	NaN	NaN	NaN	NaN	NaN
	-0.127656	-0.0350912	-0.118022	-0.0102357	-0.04149	NaN	NaN	NaN	NaN	NaN
	-0.0824924	0.140376	-0.127977	0.254895	0.037342	NaN	NaN	NaN	NaN	NaN
	-0.329295	0.167923	0.0972392	-0.484606	0.00370509	NaN	NaN	NaN	NaN	NaN
	0.271064	-0.147503	0.0826889	-0.206293	0.10684	NaN	NaN	NaN	NaN	NaN
	-0.0150712	-0.0966842	-0.143481	-0.499591	-0.0495183	NaN	NaN	NaN	NaN	NaN
	-0.00173329	0.0382519	-0.0111088	-0.394308	0.00414979	NaN	NaN	NaN	NaN	NaN
	0.0158349	0.0444575	-0.231595	0.0249744	-0.00877303	NaN	NaN	NaN	NaN	NaN
	0.0122003	NaN	-0.160184	-0.0207766	0.0332655	NaN	NaN	NaN	NaN	NaN
	-0.0484624	NaN	0.0888026	-0.163023	0.0388089	NaN	NaN	NaN	NaN	NaN
	0.192671	NaN	0.045812	-0.220788	0.0224095	NaN	NaN	NaN	NaN	NaN
	-0.294963	NaN	0.0338559	-0.407877	NaN	NaN	NaN	NaN	NaN	NaN
	-0.0419617	NaN	0.0238448	-0.231826	NaN	NaN	NaN	NaN	NaN	NaN
	-0.0749172	NaN	-0.0954878	-0.0786547	NaN	NaN	NaN	NaN	NaN	NaN
	0.108745	NaN	0.0636447	0.678513	NaN	NaN	NaN	NaN	NaN	NaN
	-0.100993	NaN	-0.156808	0.143357	NaN	NaN	NaN	NaN	NaN	NaN
	0.162869	NaN	-0.325133	0.16579	NaN	NaN	NaN	NaN	NaN	NaN
	-0.084558	NaN	0.0909693	-0.0341555	NaN	NaN	NaN	NaN	NaN	NaN
	0.0647224	NaN	-0.0529947	-0.188517	NaN	NaN	NaN	NaN	NaN	NaN
	0.22255	NaN	0.185579	-0.209521	NaN	NaN	NaN	NaN	NaN	NaN
	0.0908856	NaN	0.114783	-0.128025	NaN	NaN	NaN	NaN	NaN	NaN
	-0.128305	NaN	0.198817	0.449694	NaN	NaN	NaN	NaN	NaN	NaN
	0.180212	NaN	0.0851912	-0.11416	NaN	NaN	NaN	NaN	NaN	NaN
	-0.0402966	NaN	-0.149503	-0.0214618	NaN	NaN	NaN	NaN	NaN	NaN
	-0.0810334	NaN	-0.154624	0.211004	NaN	NaN	NaN	NaN	NaN	NaN
	-0.033429	NaN	0.276259	0.263296	NaN	NaN	NaN	NaN	NaN	NaN
	-0.0110923	NaN	-0.161138	-0.374632	NaN	NaN	NaN	NaN	NaN	NaN
	-0.22718	NaN	-0.0735855	-0.11182	NaN	NaN	NaN	NaN	NaN	NaN
	0.016554	NaN	0.178304	-0.149394	NaN	NaN	NaN	NaN	NaN	NaN
	0.0177238	NaN	0.178753	-0.469353	NaN	NaN	NaN	NaN	NaN	NaN
	0.355651	NaN	0.105896	0.157065	NaN	NaN	NaN	NaN	NaN	NaN
	0.0788636	NaN	-0.14712	-0.111554	NaN	NaN	NaN	NaN	NaN	NaN
	0.13327	NaN	0.057789	-0.282395	NaN	NaN	NaN	NaN	NaN	NaN
	-0.0500887	NaN	0.205775	NaN	NaN	NaN	NaN	NaN	NaN	NaN
	-0.0149087	NaN	-0.132061	NaN	NaN	NaN	NaN	NaN	NaN	NaN
	0.148742	NaN	-0.0834747	NaN	NaN	NaN	NaN	NaN	NaN	NaN
	-0.2372	NaN	0.00951061	NaN	NaN	NaN	NaN	NaN	NaN	NaN
	-0.0161256	NaN	-0.209352	NaN	NaN	NaN	NaN	NaN	NaN	NaN
	0.00807502	NaN	-0.338199	NaN	NaN	NaN	NaN	NaN	NaN	NaN
	0.103097	NaN	0.0251051	NaN	NaN	NaN	NaN	NaN	NaN	NaN
	-0.028742	NaN	0.236005	NaN	NaN	NaN	NaN	NaN	NaN	NaN
	0.143197	NaN	0.336526	NaN	NaN	NaN	NaN	NaN	NaN	NaN
	0.0160126	NaN	0.0861413	NaN	NaN	NaN	NaN	NaN	NaN	NaN
	-0.0579131	NaN	0.198517	NaN	NaN	NaN	NaN	NaN	NaN	NaN
	-0.307519	NaN	0.14673	NaN	NaN	NaN	NaN	NaN	NaN	NaN
	0.0165466	NaN	0.0113167	NaN	NaN	NaN	NaN	NaN	NaN	NaN
	-0.293188	NaN	-0.012472	NaN	NaN	NaN	NaN	NaN	NaN	NaN
	0.0179601	NaN	-0.288551	NaN	NaN	NaN	NaN	NaN	NaN	NaN
	0.0556157	NaN	0.0986898	NaN	NaN	NaN	NaN	NaN	NaN	NaN
	0.0257112	NaN	0.108549	NaN	NaN	NaN	NaN	NaN	NaN	NaN
	0.279601	NaN	0.0167165	NaN	NaN	NaN	NaN	NaN	NaN	NaN
	-0.160654	NaN	0.0574711	NaN	NaN	NaN	NaN	NaN	NaN	NaN
	-0.0558674	NaN	0.00559183	NaN	NaN	NaN	NaN	NaN	NaN	NaN
	0.0127045	NaN	0.243489	NaN	NaN	NaN	NaN	NaN	NaN	NaN
	0.0537005	NaN	-0.141302	NaN	NaN	NaN	NaN	NaN	NaN	NaN
	0.269413	NaN	-0.107221	NaN	NaN	NaN	NaN	NaN	NaN	NaN
	-0.0617098	NaN	-0.215159	NaN	NaN	NaN	NaN	NaN	NaN	NaN
	-0.0477604	NaN	-0.0662982	NaN	NaN	NaN	NaN	NaN	NaN	NaN
	-0.142821	NaN	0.165536	NaN	NaN	NaN	NaN	NaN	NaN	NaN
	0.0136973	NaN	-0.158165	NaN	NaN	NaN	NaN	NaN	NaN	NaN
	0.0284243	NaN	-0.103086	NaN	NaN	NaN	NaN	NaN	NaN	NaN
	0.168653	NaN	0.164822	NaN	NaN	NaN	NaN	NaN	NaN	NaN
	-0.00299388	NaN	-0.00537219	NaN	NaN	NaN	NaN	NaN	NaN	NaN
	-0.0151255	NaN	-0.0263494	NaN	NaN	NaN	NaN	NaN	NaN	NaN
	0.118499	NaN	-0.118966	NaN	NaN	NaN	NaN	NaN	NaN	NaN
	0.0592949	NaN	-0.129105	NaN	NaN	NaN	NaN	NaN	NaN	NaN
	-0.0898259	NaN	-0.203109	NaN	NaN	NaN	NaN	NaN	NaN	NaN
	-0.0824094	NaN	-0.0230044	NaN	NaN	NaN	NaN	NaN	NaN	NaN
	0.0989586	NaN	-0.0960094	NaN	NaN	NaN	NaN	NaN	NaN	NaN
	0.0362783	NaN	-0.0168999	NaN	NaN	NaN	NaN	NaN	NaN	NaN
	-0.0612313	NaN	-0.0624035	NaN	NaN	NaN	NaN	NaN	NaN	NaN
	0.0157785	NaN	0.139115	NaN	NaN	NaN	NaN	NaN	NaN	NaN
	0.0788808	NaN	-0.0383387	NaN	NaN	NaN	NaN	NaN	NaN	NaN
	0.0891733	NaN	0.19462	NaN	NaN	NaN	NaN	NaN	NaN	NaN
	-0.283857	NaN	-0.242012	NaN	NaN	NaN	NaN	NaN	NaN	NaN
	-0.160378	NaN	0.198523	NaN	NaN	NaN	NaN	NaN	NaN	NaN
	-0.173573	NaN	0.278426	NaN	NaN	NaN	NaN	NaN	NaN	NaN
	0.0606947	NaN	-0.00974672	NaN	NaN	NaN	NaN	NaN	NaN	NaN
	-0.14501	NaN	-0.0104574	NaN	NaN	NaN	NaN	NaN	NaN	NaN
	0.123537	NaN	-0.117595	NaN	NaN	NaN	NaN	NaN	NaN	NaN
	0.11598	NaN	-0.0310309	NaN	NaN	NaN	NaN	NaN	NaN	NaN
	-0.0373799	NaN	0.0860855	NaN	NaN	NaN	NaN	NaN	NaN	NaN
	0.105458	NaN	0.010437	NaN	NaN	NaN	NaN	NaN	NaN	NaN
	0.082263	NaN	0.0366199	NaN	NaN	NaN	NaN	NaN	NaN	NaN
	-0.0932894	NaN	0.0791602	NaN	NaN	NaN	NaN	NaN	NaN	NaN
	-0.13531	NaN	0.125566	NaN	NaN	NaN	NaN	NaN	NaN	NaN
	0.00345537	NaN	0.300499	NaN	NaN	NaN	NaN	NaN	NaN	NaN
	-0.0189958	NaN	0.13133	NaN	NaN	NaN	NaN	NaN	NaN	NaN
	-0.161634	NaN	0.251852	NaN	NaN	NaN	NaN	NaN	NaN	NaN
	-0.0550702	NaN	-0.186503	NaN	NaN	NaN	NaN	NaN	NaN	NaN
	0.127143	NaN	-0.0370933	NaN	NaN	NaN	NaN	NaN	NaN	NaN
	-0.223313	NaN	-0.547577	NaN	NaN	NaN	NaN	NaN	NaN	NaN
	-0.120525	NaN	-0.0152984	NaN	NaN	NaN	NaN	NaN	NaN	NaN
	0.0965802	NaN	-0.227264	NaN	NaN	NaN	NaN	NaN	NaN	NaN
	0.168256	NaN	0.137415	NaN	NaN	NaN	NaN	NaN	NaN	NaN
	-0.182529	NaN	-0.186877	NaN	NaN	NaN	NaN	NaN	NaN	NaN
	0.125467	NaN	0.412393	NaN	NaN	NaN	NaN	NaN	NaN	NaN
	-0.0647349	NaN	0.0670913	NaN	NaN	NaN	NaN	NaN	NaN	NaN
	-0.0618857	NaN	-0.144384	NaN	NaN	NaN	NaN	NaN	NaN	NaN
	-0.123897	NaN	-0.298845	NaN	NaN	NaN	NaN	NaN	NaN	NaN
	0.0418593	NaN	0.133433	NaN	NaN	NaN	NaN	NaN	NaN	NaN
	-0.14572	NaN	0.159885	NaN	NaN	NaN	NaN	NaN	NaN	NaN
	0.0398024	NaN	0.00598715	NaN	NaN	NaN	NaN	NaN	NaN	NaN
	-0.202307	NaN	0.0904466	NaN	NaN	NaN	NaN	NaN	NaN	NaN
	-0.158491	NaN	-0.113265	NaN	NaN	NaN	NaN	NaN	NaN	NaN
	0.0662334	NaN	-0.0267596	NaN	NaN	NaN	NaN	NaN	NaN	NaN
	0.183793	NaN	-0.181382	NaN	NaN	NaN	NaN	NaN	NaN	NaN
	0.015737	NaN	0.329426	NaN	NaN	NaN	NaN	NaN	NaN	NaN
	-0.206311	NaN	-0.263785	NaN	NaN	NaN	NaN	NaN	NaN	NaN
	0.0729386	NaN	-0.26229	NaN	NaN	NaN	NaN	NaN	NaN	NaN
	-0.03496	NaN	0.000338027	NaN	NaN	NaN	NaN	NaN	NaN	NaN
	-0.0611341	NaN	0.154706	NaN	NaN	NaN	NaN	NaN	NaN	NaN
	-0.00236327	NaN	-0.326375	NaN	NaN	NaN	NaN	NaN	NaN	NaN
	-0.104252	NaN	0.152882	NaN	NaN	NaN	NaN	NaN	NaN	NaN
	0.0962002	NaN	0.112294	NaN	NaN	NaN	NaN	NaN	NaN	NaN
	-0.0289618	NaN	-0.038766	NaN	NaN	NaN	NaN	NaN	NaN	NaN
	-0.222567	NaN	-0.0840615	NaN	NaN	NaN	NaN	NaN	NaN	NaN
	0.0259766	NaN	-0.0806588	NaN	NaN	NaN	NaN	NaN	NaN	NaN
	-0.152628	NaN	-0.026456	NaN	NaN	NaN	NaN	NaN	NaN	NaN
	-0.0743986	NaN	-0.0967495	NaN	NaN	NaN	NaN	NaN	NaN	NaN
	-0.0799981	NaN	-0.148756	NaN	NaN	NaN	NaN	NaN	NaN	NaN
	0.100232	NaN	-0.196786	NaN	NaN	NaN	NaN	NaN	NaN	NaN
	0.174243	NaN	0.227579	NaN	NaN	NaN	NaN	NaN	NaN	NaN
	0.196991	NaN	0.00607147	NaN	NaN	NaN	NaN	NaN	NaN	NaN
	0.0701888	NaN	0.0626939	NaN	NaN	NaN	NaN	NaN	NaN	NaN
	-0.16965	NaN	-0.0265107	NaN	NaN	NaN	NaN	NaN	NaN	NaN
	0.13345	NaN	-0.0922075	NaN	NaN	NaN	NaN	NaN	NaN	NaN
	-0.0793523	NaN	-0.194022	NaN	NaN	NaN	NaN	NaN	NaN	NaN
	-0.172578	NaN	-0.148777	NaN	NaN	NaN	NaN	NaN	NaN	NaN
	0.0209235	NaN	0.0110161	NaN	NaN	NaN	NaN	NaN	NaN	NaN
	0.123575	NaN	-0.147476	NaN	NaN	NaN	NaN	NaN	NaN	NaN
	0.233264	NaN	-0.0765261	NaN	NaN	NaN	NaN	NaN	NaN	NaN
	-0.0610108	NaN	-0.247625	NaN	NaN	NaN	NaN	NaN	NaN	NaN
	0.0676195	NaN	-0.245086	NaN	NaN	NaN	NaN	NaN	NaN	NaN
	-0.121355	NaN	-0.00245088	NaN	NaN	NaN	NaN	NaN	NaN	NaN
	0.102015	NaN	0.0647974	NaN	NaN	NaN	NaN	NaN	NaN	NaN
	-0.00665454	NaN	-0.113592	NaN	NaN	NaN	NaN	NaN	NaN	NaN
	0.0224704	NaN	0.00377021	NaN	NaN	NaN	NaN	NaN	NaN	NaN
	-0.0319598	NaN	-0.220137	NaN	NaN	NaN	NaN	NaN	NaN	NaN
	-0.251368	NaN	0.134169	NaN	NaN	NaN	NaN	NaN	NaN	NaN
	0.124795	NaN	-0.171504	NaN	NaN	NaN	NaN	NaN	NaN	NaN
	0.190912	NaN	-0.209719	NaN	NaN	NaN	NaN	NaN	NaN	NaN
	-0.0954962	NaN	-0.273709	NaN	NaN	NaN	NaN	NaN	NaN	NaN
	0.0205073	NaN	-0.252336	NaN	NaN	NaN	NaN	NaN	NaN	NaN
	0.109449	NaN	-0.0591331	NaN	NaN	NaN	NaN	NaN	NaN	NaN
	0.116317	NaN	-0.0677466	NaN	NaN	NaN	NaN	NaN	NaN	NaN
	0.118509	NaN	-0.0698075	NaN	NaN	NaN	NaN	NaN	NaN	NaN
	0.173307	NaN	0.439152	NaN	NaN	NaN	NaN	NaN	NaN	NaN
	-0.0436374	NaN	0.306149	NaN	NaN	NaN	NaN	NaN	NaN	NaN
	-0.1666	NaN	-0.106763	NaN	NaN	NaN	NaN	NaN	NaN	NaN
	-0.165264	NaN	0.0741754	NaN	NaN	NaN	NaN	NaN	NaN	NaN
	0.147986	NaN	0.0628608	NaN	NaN	NaN	NaN	NaN	NaN	NaN
	0.195855	NaN	-0.300043	NaN	NaN	NaN	NaN	NaN	NaN	NaN
	0.00317273	NaN	-0.212381	NaN	NaN	NaN	NaN	NaN	NaN	NaN
	-0.0371332	NaN	-0.147337	NaN	NaN	NaN	NaN	NaN	NaN	NaN
	-0.0346836	NaN	-0.0963431	NaN	NaN	NaN	NaN	NaN	NaN	NaN
	-0.0108043	NaN	-0.222073	NaN	NaN	NaN	NaN	NaN	NaN	NaN
	0.0521351	NaN	-0.121661	NaN	NaN	NaN	NaN	NaN	NaN	NaN
	-0.083355	NaN	0.0214389	NaN	NaN	NaN	NaN	NaN	NaN	NaN
	0.0939196	NaN	-0.281781	NaN	NaN	NaN	NaN	NaN	NaN	NaN
	-0.12256	NaN	-0.145825	NaN	NaN	NaN	NaN	NaN	NaN	NaN
	-0.38756	NaN	0.00311208	NaN	NaN	NaN	NaN	NaN	NaN	NaN
	0.100845	NaN	-0.0122255	NaN	NaN	NaN	NaN	NaN	NaN	NaN
	0.137431	NaN	-0.186469	NaN	NaN	NaN	NaN	NaN	NaN	NaN
	0.177697	NaN	0.0521889	NaN	NaN	NaN	NaN	NaN	NaN	NaN
	-0.179991	NaN	0.0863174	NaN	NaN	NaN	NaN	NaN	NaN	NaN
	0.167314	NaN	0.0676099	NaN	NaN	NaN	NaN	NaN	NaN	NaN
	-0.0145326	NaN	-0.156996	NaN	NaN	NaN	NaN	NaN	NaN	NaN
	-0.252608	NaN	0.00902685	NaN	NaN	NaN	NaN	NaN	NaN	NaN
	-0.0796624	NaN	-0.0229037	NaN	NaN	NaN	NaN	NaN	NaN	NaN
	-0.0147788	NaN	0.148736	NaN	NaN	NaN	NaN	NaN	NaN	NaN
	0.0817437	NaN	0.184521	NaN	NaN	NaN	NaN	NaN	NaN	NaN
	0.0909562	NaN	-0.0764133	NaN	NaN	NaN	NaN	NaN	NaN	NaN
	0.0644557	NaN	0.0687252	NaN	NaN	NaN	NaN	NaN	NaN	NaN
	-0.0988856	NaN	0.276955	NaN	NaN	NaN	NaN	NaN	NaN	NaN
	-0.02465	NaN	-0.0345441	NaN	NaN	NaN	NaN	NaN	NaN	NaN
	-0.188869	NaN	0.111007	NaN	NaN	NaN	NaN	NaN	NaN	NaN
	-0.0185961	NaN	-0.0685763	NaN	NaN	NaN	NaN	NaN	NaN	NaN
	-0.167814	NaN	-0.0688914	NaN	NaN	NaN	NaN	NaN	NaN	NaN
	0.368918	NaN	-0.103046	NaN	NaN	NaN	NaN	NaN	NaN	NaN
	-0.00446424	NaN	-0.019028	NaN	NaN	NaN	NaN	NaN	NaN	NaN
	0.00204034	NaN	0.101597	NaN	NaN	NaN	NaN	NaN	NaN	NaN
	0.196776	NaN	0.0377831	NaN	NaN	NaN	NaN	NaN	NaN	NaN
	-0.0369154	NaN	0.165254	NaN	NaN	NaN	NaN	NaN	NaN	NaN
	0.0703059	NaN	-0.00753622	NaN	NaN	NaN	NaN	NaN	NaN	NaN
	0.0686117	NaN	-0.0836301	NaN	NaN	NaN	NaN	NaN	NaN	NaN
	0.0244301	NaN	0.505019	NaN	NaN	NaN	NaN	NaN	NaN	NaN
	-0.108124	NaN	-0.0327986	NaN	NaN	NaN	NaN	NaN	NaN	NaN
	-0.0915749	NaN	-0.0550321	NaN	NaN	NaN	NaN	NaN	NaN	NaN
	0.0526179	NaN	-0.0629233	NaN	NaN	NaN	NaN	NaN	NaN	NaN
	-0.0233609	NaN	-0.0442384	NaN	NaN	NaN	NaN	NaN	NaN	NaN
	0.158312	NaN	0.165072	NaN	NaN	NaN	NaN	NaN	NaN	NaN
	-0.133176	NaN	-0.073355	NaN	NaN	NaN	NaN	NaN	NaN	NaN
	-0.0275129	NaN	0.00106379	NaN	NaN	NaN	NaN	NaN	NaN	NaN
	-0.0183976	NaN	0.189209	NaN	NaN	NaN	NaN	NaN	NaN	NaN
	-0.123842	NaN	0.00475297	NaN	NaN	NaN	NaN	NaN	NaN	NaN
	-0.0159535	NaN	0.297874	NaN	NaN	NaN	NaN	NaN	NaN	NaN
	0.101358	NaN	-0.0659517	NaN	NaN	NaN	NaN	NaN	NaN	NaN
	-0.473211	NaN	-0.113584	NaN	NaN	NaN	NaN	NaN	NaN	NaN
	-0.0548936	NaN	0.150298	NaN	NaN	NaN	NaN	NaN	NaN	NaN
	-0.0663275	NaN	0.208004	NaN	NaN	NaN	NaN	NaN	NaN	NaN
	-0.141052	NaN	0.0820729	NaN	NaN	NaN	NaN	NaN	NaN	NaN
	0.0310129	NaN	0.140475	NaN	NaN	NaN	NaN	NaN	NaN	NaN
	0.0629293	NaN	-0.189806	NaN	NaN	NaN	NaN	NaN	NaN	NaN
	-0.0246606	NaN	0.24113	NaN	NaN	NaN	NaN	NaN	NaN	NaN
	-0.106197	NaN	0.0928744	NaN	NaN	NaN	NaN	NaN	NaN	NaN
	0.0160104	NaN	0.0401895	NaN	NaN	NaN	NaN	NaN	NaN	NaN
	-0.00846881	NaN	0.125459	NaN	NaN	NaN	NaN	NaN	NaN	NaN
	0.173017	NaN	-0.11305	NaN	NaN	NaN	NaN	NaN	NaN	NaN
	0.0787139	NaN	0.174813	NaN	NaN	NaN	NaN	NaN	NaN	NaN
	0.17003	NaN	0.0724286	NaN	NaN	NaN	NaN	NaN	NaN	NaN
	-0.0599878	NaN	0.0864265	NaN	NaN	NaN	NaN	NaN	NaN	NaN
	0.0934583	NaN	-0.0431524	NaN	NaN	NaN	NaN	NaN	NaN	NaN
	0.189156	NaN	0.0468628	NaN	NaN	NaN	NaN	NaN	NaN	NaN
	0.0271009	NaN	-0.414762	NaN	NaN	NaN	NaN	NaN	NaN	NaN
	0.100424	NaN	-0.18724	NaN	NaN	NaN	NaN	NaN	NaN	NaN
	0.13585	NaN	-0.189921	NaN	NaN	NaN	NaN	NaN	NaN	NaN
	-0.213223	NaN	0.200694	NaN	NaN	NaN	NaN	NaN	NaN	NaN
	0.0240564	NaN	0.0878636	NaN	NaN	NaN	NaN	NaN	NaN	NaN
	0.224695	NaN	-0.0598113	NaN	NaN	NaN	NaN	NaN	NaN	NaN
	-0.0454304	NaN	-0.28502	NaN	NaN	NaN	NaN	NaN	NaN	NaN
	0.00738022	NaN	-0.154847	NaN	NaN	NaN	NaN	NaN	NaN	NaN
	-0.136482	NaN	0.0998155	NaN	NaN	NaN	NaN	NaN	NaN	NaN
	-0.264929	NaN	0.0851035	NaN	NaN	NaN	NaN	NaN	NaN	NaN
	0.0166665	NaN	-0.0631625	NaN	NaN	NaN	NaN	NaN	NaN	NaN
	-0.133713	NaN	-0.180906	NaN	NaN	NaN	NaN	NaN	NaN	NaN
	0.615253	NaN	-0.0121016	NaN	NaN	NaN	NaN	NaN	NaN	NaN
	-0.00129796	NaN	0.0511411	NaN	NaN	NaN	NaN	NaN	NaN	NaN
	0.270986	NaN	0.0183775	NaN	NaN	NaN	NaN	NaN	NaN	NaN
	0.0456496	NaN	0.0638087	NaN	NaN	NaN	NaN	NaN	NaN	NaN
	-0.0741064	NaN	0.171735	NaN	NaN	NaN	NaN	NaN	NaN	NaN
	-0.112271	NaN	0.0822174	NaN	NaN	NaN	NaN	NaN	NaN	NaN
	0.136223	NaN	-0.150113	NaN	NaN	NaN	NaN	NaN	NaN	NaN
	-0.0399386	NaN	0.127552	NaN	NaN	NaN	NaN	NaN	NaN	NaN
	0.0371783	NaN	0.0955482	NaN	NaN	NaN	NaN	NaN	NaN	NaN
	-0.0198262	NaN	-0.0296448	NaN	NaN	NaN	NaN	NaN	NaN	NaN
	-0.156081	NaN	0.235488	NaN	NaN	NaN	NaN	NaN	NaN	NaN
	0.0891581	NaN	0.0265126	NaN	NaN	NaN	NaN	NaN	NaN	NaN
	0.0846429	NaN	0.271849	NaN	NaN	NaN	NaN	NaN	NaN	NaN
	-0.110174	NaN	-0.0741391	NaN	NaN	NaN	NaN	NaN	NaN	NaN
	-0.103316	NaN	0.0177262	NaN	NaN	NaN	NaN	NaN	NaN	NaN
	-0.00357338	NaN	0.0316627	NaN	NaN	NaN	NaN	NaN	NaN	NaN
	0.114349	NaN	-0.107688	NaN	NaN	NaN	NaN	NaN	NaN	NaN
	-0.0802836	NaN	-0.0932139	NaN	NaN	NaN	NaN	NaN	NaN	NaN
	0.119949	NaN	-0.290693	NaN	NaN	NaN	NaN	NaN	NaN	NaN
	-0.230719	NaN	-0.0551635	NaN	NaN	NaN	NaN	NaN	NaN	NaN
	-0.191345	NaN	-0.0991956	NaN	NaN	NaN	NaN	NaN	NaN	NaN
	-0.198359	NaN	-0.175874	NaN	NaN	NaN	NaN	NaN	NaN	NaN
	0.0209228	NaN	-0.0909054	NaN	NaN	NaN	NaN	NaN	NaN	NaN
	-0.192718	NaN	0.0937267	NaN	NaN	NaN	NaN	NaN	NaN	NaN
	0.11076	NaN	0.0136136	NaN	NaN	NaN	NaN	NaN	NaN	NaN
	0.0300043	NaN	0.0509292	NaN	NaN	NaN	NaN	NaN	NaN	NaN
	-0.220987	NaN	-0.0670596	NaN	NaN	NaN	NaN	NaN	NaN	NaN
	-0.119331	NaN	0.236769	NaN	NaN	NaN	NaN	NaN	NaN	NaN
	-0.175552	NaN	-0.227895	NaN	NaN	NaN	NaN	NaN	NaN	NaN
	-0.0576419	NaN	0.0238437	NaN	NaN	NaN	NaN	NaN	NaN	NaN
	-0.0495076	NaN	0.0795592	NaN	NaN	NaN	NaN	NaN	NaN	NaN
	0.0595967	NaN	0.0266893	NaN	NaN	NaN	NaN	NaN	NaN	NaN
	0.119251	NaN	-0.0521651	NaN	NaN	NaN	NaN	NaN	NaN	NaN
	-0.214013	NaN	0.0250492	NaN	NaN	NaN	NaN	NaN	NaN	NaN
	-0.0261589	NaN	0.0353172	NaN	NaN	NaN	NaN	NaN	NaN	NaN
	0.225756	NaN	-0.206481	NaN	NaN	NaN	NaN	NaN	NaN	NaN
	-0.0626178	NaN	0.0338763	NaN	NaN	NaN	NaN	NaN	NaN	NaN
	-0.120833	NaN	0.172097	NaN	NaN	NaN	NaN	NaN	NaN	NaN
	-0.143075	NaN	-0.108702	NaN	NaN	NaN	NaN	NaN	NaN	NaN
	-0.0158188	NaN	0.224323	NaN	NaN	NaN	NaN	NaN	NaN	NaN
	-0.129927	NaN	-0.250443	NaN	NaN	NaN	NaN	NaN	NaN	NaN
	-0.138931	NaN	-0.0722181	NaN	NaN	NaN	NaN	NaN	NaN	NaN
	0.254918	NaN	0.0749653	NaN	NaN	NaN	NaN	NaN	NaN	NaN
	0.0176959	NaN	-0.0423511	NaN	NaN	NaN	NaN	NaN	NaN	NaN
	-0.296921	NaN	-0.0113081	NaN	NaN	NaN	NaN	NaN	NaN	NaN
	0.00906272	NaN	0.278664	NaN	NaN	NaN	NaN	NaN	NaN	NaN
	-0.053898	NaN	NaN	NaN	NaN	NaN	NaN	NaN	NaN	NaN
	0.0780796	NaN	NaN	NaN	NaN	NaN	NaN	NaN	NaN	NaN
	-0.0465773	NaN	NaN	NaN	NaN	NaN	NaN	NaN	NaN	NaN
	-0.00192543	NaN	NaN	NaN	NaN	NaN	NaN	NaN	NaN	NaN
	-0.124215	NaN	NaN	NaN	NaN	NaN	NaN	NaN	NaN	NaN
	0.135149	NaN	NaN	NaN	NaN	NaN	NaN	NaN	NaN	NaN
	0.0829013	NaN	NaN	NaN	NaN	NaN	NaN	NaN	NaN	NaN
	-0.110999	NaN	NaN	NaN	NaN	NaN	NaN	NaN	NaN	NaN
	0.000899347	NaN	NaN	NaN	NaN	NaN	NaN	NaN	NaN	NaN
	0.0105185	NaN	NaN	NaN	NaN	NaN	NaN	NaN	NaN	NaN
	-0.0582307	NaN	NaN	NaN	NaN	NaN	NaN	NaN	NaN	NaN
	-0.0883895	NaN	NaN	NaN	NaN	NaN	NaN	NaN	NaN	NaN
	0.628142	NaN	NaN	NaN	NaN	NaN	NaN	NaN	NaN	NaN
	0.021706	NaN	NaN	NaN	NaN	NaN	NaN	NaN	NaN	NaN
	-0.0506563	NaN	NaN	NaN	NaN	NaN	NaN	NaN	NaN	NaN
	-0.0385131	NaN	NaN	NaN	NaN	NaN	NaN	NaN	NaN	NaN
	0.177113	NaN	NaN	NaN	NaN	NaN	NaN	NaN	NaN	NaN
	-0.0247501	NaN	NaN	NaN	NaN	NaN	NaN	NaN	NaN	NaN
	0.0192478	NaN	NaN	NaN	NaN	NaN	NaN	NaN	NaN	NaN
	0.0312769	NaN	NaN	NaN	NaN	NaN	NaN	NaN	NaN	NaN
	0.237471	NaN	NaN	NaN	NaN	NaN	NaN	NaN	NaN	NaN
	0.0374426	NaN	NaN	NaN	NaN	NaN	NaN	NaN	NaN	NaN
	0.157524	NaN	NaN	NaN	NaN	NaN	NaN	NaN	NaN	NaN
	0.133598	NaN	NaN	NaN	NaN	NaN	NaN	NaN	NaN	NaN
	-0.0233019	NaN	NaN	NaN	NaN	NaN	NaN	NaN	NaN	NaN
	-0.391038	NaN	NaN	NaN	NaN	NaN	NaN	NaN	NaN	NaN
	-0.205235	NaN	NaN	NaN	NaN	NaN	NaN	NaN	NaN	NaN
	-0.227472	NaN	NaN	NaN	NaN	NaN	NaN	NaN	NaN	NaN
	0.462327	NaN	NaN	NaN	NaN	NaN	NaN	NaN	NaN	NaN
	0.11282	NaN	NaN	NaN	NaN	NaN	NaN	NaN	NaN	NaN
	-0.0524184	NaN	NaN	NaN	NaN	NaN	NaN	NaN	NaN	NaN
	0.304406	NaN	NaN	NaN	NaN	NaN	NaN	NaN	NaN	NaN
	0.207244	NaN	NaN	NaN	NaN	NaN	NaN	NaN	NaN	NaN
	0.191708	NaN	NaN	NaN	NaN	NaN	NaN	NaN	NaN	NaN
	-0.0877102	NaN	NaN	NaN	NaN	NaN	NaN	NaN	NaN	NaN
	0.0684225	NaN	NaN	NaN	NaN	NaN	NaN	NaN	NaN	NaN
	0.0716571	NaN	NaN	NaN	NaN	NaN	NaN	NaN	NaN	NaN
	0.0108428	NaN	NaN	NaN	NaN	NaN	NaN	NaN	NaN	NaN
	-0.0842367	NaN	NaN	NaN	NaN	NaN	NaN	NaN	NaN	NaN
	-0.301951	NaN	NaN	NaN	NaN	NaN	NaN	NaN	NaN	NaN
	0.116046	NaN	NaN	NaN	NaN	NaN	NaN	NaN	NaN	NaN
	0.154836	NaN	NaN	NaN	NaN	NaN	NaN	NaN	NaN	NaN
	-0.151095	NaN	NaN	NaN	NaN	NaN	NaN	NaN	NaN	NaN
	0.284394	NaN	NaN	NaN	NaN	NaN	NaN	NaN	NaN	NaN
	-0.0512587	NaN	NaN	NaN	NaN	NaN	NaN	NaN	NaN	NaN
	0.133261	NaN	NaN	NaN	NaN	NaN	NaN	NaN	NaN	NaN
	-0.12449	NaN	NaN	NaN	NaN	NaN	NaN	NaN	NaN	NaN
	-0.0693284	NaN	NaN	NaN	NaN	NaN	NaN	NaN	NaN	NaN
	-0.0478641	NaN	NaN	NaN	NaN	NaN	NaN	NaN	NaN	NaN
	0.354275	NaN	NaN	NaN	NaN	NaN	NaN	NaN	NaN	NaN
	-0.14123	NaN	NaN	NaN	NaN	NaN	NaN	NaN	NaN	NaN
	-0.104381	NaN	NaN	NaN	NaN	NaN	NaN	NaN	NaN	NaN
	0.0357469	NaN	NaN	NaN	NaN	NaN	NaN	NaN	NaN	NaN
	-0.0189741	NaN	NaN	NaN	NaN	NaN	NaN	NaN	NaN	NaN
	0.17871	NaN	NaN	NaN	NaN	NaN	NaN	NaN	NaN	NaN
	0.0809863	NaN	NaN	NaN	NaN	NaN	NaN	NaN	NaN	NaN
	-0.0873976	NaN	NaN	NaN	NaN	NaN	NaN	NaN	NaN	NaN
	0.0553675	NaN	NaN	NaN	NaN	NaN	NaN	NaN	NaN	NaN
	-0.0960381	NaN	NaN	NaN	NaN	NaN	NaN	NaN	NaN	NaN
	0.318956	NaN	NaN	NaN	NaN	NaN	NaN	NaN	NaN	NaN
	0.0536383	NaN	NaN	NaN	NaN	NaN	NaN	NaN	NaN	NaN
	0.112023	NaN	NaN	NaN	NaN	NaN	NaN	NaN	NaN	NaN
	0.0206171	NaN	NaN	NaN	NaN	NaN	NaN	NaN	NaN	NaN
	-0.0648125	NaN	NaN	NaN	NaN	NaN	NaN	NaN	NaN	NaN
	0.0248193	NaN	NaN	NaN	NaN	NaN	NaN	NaN	NaN	NaN
	0.232478	NaN	NaN	NaN	NaN	NaN	NaN	NaN	NaN	NaN
	0.010873	NaN	NaN	NaN	NaN	NaN	NaN	NaN	NaN	NaN
	-0.0247035	NaN	NaN	NaN	NaN	NaN	NaN	NaN	NaN	NaN
	-0.227503	NaN	NaN	NaN	NaN	NaN	NaN	NaN	NaN	NaN
	-0.0026242	NaN	NaN	NaN	NaN	NaN	NaN	NaN	NaN	NaN
	0.183763	NaN	NaN	NaN	NaN	NaN	NaN	NaN	NaN	NaN
	0.0387045	NaN	NaN	NaN	NaN	NaN	NaN	NaN	NaN	NaN
	0.163039	NaN	NaN	NaN	NaN	NaN	NaN	NaN	NaN	NaN
	0.0750929	NaN	NaN	NaN	NaN	NaN	NaN	NaN	NaN	NaN
	0.0641045	NaN	NaN	NaN	NaN	NaN	NaN	NaN	NaN	NaN
	-0.108855	NaN	NaN	NaN	NaN	NaN	NaN	NaN	NaN	NaN
	0.0530397	NaN	NaN	NaN	NaN	NaN	NaN	NaN	NaN	NaN
	-0.172406	NaN	NaN	NaN	NaN	NaN	NaN	NaN	NaN	NaN
	0.0450514	NaN	NaN	NaN	NaN	NaN	NaN	NaN	NaN	NaN
	0.106191	NaN	NaN	NaN	NaN	NaN	NaN	NaN	NaN	NaN
	-0.237409	NaN	NaN	NaN	NaN	NaN	NaN	NaN	NaN	NaN
	-0.031158	NaN	NaN	NaN	NaN	NaN	NaN	NaN	NaN	NaN
	-0.172392	NaN	NaN	NaN	NaN	NaN	NaN	NaN	NaN	NaN
	0.100129	NaN	NaN	NaN	NaN	NaN	NaN	NaN	NaN	NaN
	0.0988422	NaN	NaN	NaN	NaN	NaN	NaN	NaN	NaN	NaN
	-0.0503579	NaN	NaN	NaN	NaN	NaN	NaN	NaN	NaN	NaN
	-0.033205	NaN	NaN	NaN	NaN	NaN	NaN	NaN	NaN	NaN
	-0.0702288	NaN	NaN	NaN	NaN	NaN	NaN	NaN	NaN	NaN
	0.0892907	NaN	NaN	NaN	NaN	NaN	NaN	NaN	NaN	NaN
	-0.0716458	NaN	NaN	NaN	NaN	NaN	NaN	NaN	NaN	NaN
	-0.248643	NaN	NaN	NaN	NaN	NaN	NaN	NaN	NaN	NaN
	0.0465769	NaN	NaN	NaN	NaN	NaN	NaN	NaN	NaN	NaN
	0.0856383	NaN	NaN	NaN	NaN	NaN	NaN	NaN	NaN	NaN
	-0.393844	NaN	NaN	NaN	NaN	NaN	NaN	NaN	NaN	NaN
	0.102045	NaN	NaN	NaN	NaN	NaN	NaN	NaN	NaN	NaN
	0.630496	NaN	NaN	NaN	NaN	NaN	NaN	NaN	NaN	NaN
	-0.0150222	NaN	NaN	NaN	NaN	NaN	NaN	NaN	NaN	NaN
	-0.170608	NaN	NaN	NaN	NaN	NaN	NaN	NaN	NaN	NaN
	-0.196137	NaN	NaN	NaN	NaN	NaN	NaN	NaN	NaN	NaN
	0.0511962	NaN	NaN	NaN	NaN	NaN	NaN	NaN	NaN	NaN
	-0.0216121	NaN	NaN	NaN	NaN	NaN	NaN	NaN	NaN	NaN
	0.0838216	NaN	NaN	NaN	NaN	NaN	NaN	NaN	NaN	NaN
	-0.0762353	NaN	NaN	NaN	NaN	NaN	NaN	NaN	NaN	NaN
	-0.15232	NaN	NaN	NaN	NaN	NaN	NaN	NaN	NaN	NaN
	0.0383644	NaN	NaN	NaN	NaN	NaN	NaN	NaN	NaN	NaN
	0.0425713	NaN	NaN	NaN	NaN	NaN	NaN	NaN	NaN	NaN
	0.0133613	NaN	NaN	NaN	NaN	NaN	NaN	NaN	NaN	NaN
	-0.171138	NaN	NaN	NaN	NaN	NaN	NaN	NaN	NaN	NaN
	0.00464167	NaN	NaN	NaN	NaN	NaN	NaN	NaN	NaN	NaN
	-0.0740114	NaN	NaN	NaN	NaN	NaN	NaN	NaN	NaN	NaN
	0.0192412	NaN	NaN	NaN	NaN	NaN	NaN	NaN	NaN	NaN
	-0.177254	NaN	NaN	NaN	NaN	NaN	NaN	NaN	NaN	NaN
	-0.151144	NaN	NaN	NaN	NaN	NaN	NaN	NaN	NaN	NaN
	-0.489749	NaN	NaN	NaN	NaN	NaN	NaN	NaN	NaN	NaN
	-0.397147	NaN	NaN	NaN	NaN	NaN	NaN	NaN	NaN	NaN
	0.132871	NaN	NaN	NaN	NaN	NaN	NaN	NaN	NaN	NaN
	0.109501	NaN	NaN	NaN	NaN	NaN	NaN	NaN	NaN	NaN
	-0.192977	NaN	NaN	NaN	NaN	NaN	NaN	NaN	NaN	NaN
	-0.141987	NaN	NaN	NaN	NaN	NaN	NaN	NaN	NaN	NaN
	-0.0194139	NaN	NaN	NaN	NaN	NaN	NaN	NaN	NaN	NaN
	0.133406	NaN	NaN	NaN	NaN	NaN	NaN	NaN	NaN	NaN
	0.305122	NaN	NaN	NaN	NaN	NaN	NaN	NaN	NaN	NaN
	0.137389	NaN	NaN	NaN	NaN	NaN	NaN	NaN	NaN	NaN
	0.247854	NaN	NaN	NaN	NaN	NaN	NaN	NaN	NaN	NaN
	0.298535	NaN	NaN	NaN	NaN	NaN	NaN	NaN	NaN	NaN
	-0.281383	NaN	NaN	NaN	NaN	NaN	NaN	NaN	NaN	NaN
	-0.0957914	NaN	NaN	NaN	NaN	NaN	NaN	NaN	NaN	NaN
	0.000666341	NaN	NaN	NaN	NaN	NaN	NaN	NaN	NaN	NaN
	-0.157813	NaN	NaN	NaN	NaN	NaN	NaN	NaN	NaN	NaN
	0.0719244	NaN	NaN	NaN	NaN	NaN	NaN	NaN	NaN	NaN
	0.076769	NaN	NaN	NaN	NaN	NaN	NaN	NaN	NaN	NaN
	0.0798581	NaN	NaN	NaN	NaN	NaN	NaN	NaN	NaN	NaN
	0.100113	NaN	NaN	NaN	NaN	NaN	NaN	NaN	NaN	NaN
	-0.173241	NaN	NaN	NaN	NaN	NaN	NaN	NaN	NaN	NaN
	0.25021	NaN	NaN	NaN	NaN	NaN	NaN	NaN	NaN	NaN
	-0.284158	NaN	NaN	NaN	NaN	NaN	NaN	NaN	NaN	NaN
	0.17521	NaN	NaN	NaN	NaN	NaN	NaN	NaN	NaN	NaN
	-0.220998	NaN	NaN	NaN	NaN	NaN	NaN	NaN	NaN	NaN
	0.246281	NaN	NaN	NaN	NaN	NaN	NaN	NaN	NaN	NaN
	-0.0729267	NaN	NaN	NaN	NaN	NaN	NaN	NaN	NaN	NaN
	0.0356485	NaN	NaN	NaN	NaN	NaN	NaN	NaN	NaN	NaN
	-0.0785759	NaN	NaN	NaN	NaN	NaN	NaN	NaN	NaN	NaN
	0.0714571	NaN	NaN	NaN	NaN	NaN	NaN	NaN	NaN	NaN
	0.0579993	NaN	NaN	NaN	NaN	NaN	NaN	NaN	NaN	NaN
	0.327589	NaN	NaN	NaN	NaN	NaN	NaN	NaN	NaN	NaN
	-0.0501213	NaN	NaN	NaN	NaN	NaN	NaN	NaN	NaN	NaN
	0.0757488	NaN	NaN	NaN	NaN	NaN	NaN	NaN	NaN	NaN
	0.077528	NaN	NaN	NaN	NaN	NaN	NaN	NaN	NaN	NaN
	0.0648473	NaN	NaN	NaN	NaN	NaN	NaN	NaN	NaN	NaN
	-0.0120332	NaN	NaN	NaN	NaN	NaN	NaN	NaN	NaN	NaN
	-0.0319582	NaN	NaN	NaN	NaN	NaN	NaN	NaN	NaN	NaN
	-0.21283	NaN	NaN	NaN	NaN	NaN	NaN	NaN	NaN	NaN
	0.141492	NaN	NaN	NaN	NaN	NaN	NaN	NaN	NaN	NaN
	-0.0396125	NaN	NaN	NaN	NaN	NaN	NaN	NaN	NaN	NaN
	0.147912	NaN	NaN	NaN	NaN	NaN	NaN	NaN	NaN	NaN
	-0.112571	NaN	NaN	NaN	NaN	NaN	NaN	NaN	NaN	NaN
	0.0869602	NaN	NaN	NaN	NaN	NaN	NaN	NaN	NaN	NaN
	0.145569	NaN	NaN	NaN	NaN	NaN	NaN	NaN	NaN	NaN
	-0.186923	NaN	NaN	NaN	NaN	NaN	NaN	NaN	NaN	NaN
	-0.027103	NaN	NaN	NaN	NaN	NaN	NaN	NaN	NaN	NaN
	-0.171392	NaN	NaN	NaN	NaN	NaN	NaN	NaN	NaN	NaN
	-0.00905233	NaN	NaN	NaN	NaN	NaN	NaN	NaN	NaN	NaN
	0.0666263	NaN	NaN	NaN	NaN	NaN	NaN	NaN	NaN	NaN
	-0.0254941	NaN	NaN	NaN	NaN	NaN	NaN	NaN	NaN	NaN
	-0.0302793	NaN	NaN	NaN	NaN	NaN	NaN	NaN	NaN	NaN
	0.0485364	NaN	NaN	NaN	NaN	NaN	NaN	NaN	NaN	NaN
	-0.0624456	NaN	NaN	NaN	NaN	NaN	NaN	NaN	NaN	NaN
	0.00757008	NaN	NaN	NaN	NaN	NaN	NaN	NaN	NaN	NaN
	0.085664	NaN	NaN	NaN	NaN	NaN	NaN	NaN	NaN	NaN
	0.265288	NaN	NaN	NaN	NaN	NaN	NaN	NaN	NaN	NaN
	-0.07063	NaN	NaN	NaN	NaN	NaN	NaN	NaN	NaN	NaN
	0.072823	NaN	NaN	NaN	NaN	NaN	NaN	NaN	NaN	NaN
	0.0153626	NaN	NaN	NaN	NaN	NaN	NaN	NaN	NaN	NaN
	-0.11279	NaN	NaN	NaN	NaN	NaN	NaN	NaN	NaN	NaN
	-0.0422606	NaN	NaN	NaN	NaN	NaN	NaN	NaN	NaN	NaN
	0.132672	NaN	NaN	NaN	NaN	NaN	NaN	NaN	NaN	NaN
	-0.206199	NaN	NaN	NaN	NaN	NaN	NaN	NaN	NaN	NaN
	0.00960187	NaN	NaN	NaN	NaN	NaN	NaN	NaN	NaN	NaN
	0.294246	NaN	NaN	NaN	NaN	NaN	NaN	NaN	NaN	NaN
	0.135822	NaN	NaN	NaN	NaN	NaN	NaN	NaN	NaN	NaN
	0.145585	NaN	NaN	NaN	NaN	NaN	NaN	NaN	NaN	NaN
	-0.139843	NaN	NaN	NaN	NaN	NaN	NaN	NaN	NaN	NaN
	0.0894772	NaN	NaN	NaN	NaN	NaN	NaN	NaN	NaN	NaN
	-0.224577	NaN	NaN	NaN	NaN	NaN	NaN	NaN	NaN	NaN
	-0.120317	NaN	NaN	NaN	NaN	NaN	NaN	NaN	NaN	NaN
	0.0578049	NaN	NaN	NaN	NaN	NaN	NaN	NaN	NaN	NaN
	0.0728495	NaN	NaN	NaN	NaN	NaN	NaN	NaN	NaN	NaN
	0.0279121	NaN	NaN	NaN	NaN	NaN	NaN	NaN	NaN	NaN
	0.0124437	NaN	NaN	NaN	NaN	NaN	NaN	NaN	NaN	NaN
	0.0192145	NaN	NaN	NaN	NaN	NaN	NaN	NaN	NaN	NaN
	0.0962288	NaN	NaN	NaN	NaN	NaN	NaN	NaN	NaN	NaN
	-0.207457	NaN	NaN	NaN	NaN	NaN	NaN	NaN	NaN	NaN
	-0.0426526	NaN	NaN	NaN	NaN	NaN	NaN	NaN	NaN	NaN
	0.0385571	NaN	NaN	NaN	NaN	NaN	NaN	NaN	NaN	NaN
	0.0635176	NaN	NaN	NaN	NaN	NaN	NaN	NaN	NaN	NaN
	-0.182773	NaN	NaN	NaN	NaN	NaN	NaN	NaN	NaN	NaN
	-0.158937	NaN	NaN	NaN	NaN	NaN	NaN	NaN	NaN	NaN
	-0.186036	NaN	NaN	NaN	NaN	NaN	NaN	NaN	NaN	NaN
	-0.0405684	NaN	NaN	NaN	NaN	NaN	NaN	NaN	NaN	NaN
	0.0646108	NaN	NaN	NaN	NaN	NaN	NaN	NaN	NaN	NaN
	0.0466011	NaN	NaN	NaN	NaN	NaN	NaN	NaN	NaN	NaN
	-0.235828	NaN	NaN	NaN	NaN	NaN	NaN	NaN	NaN	NaN
	-0.200807	NaN	NaN	NaN	NaN	NaN	NaN	NaN	NaN	NaN
	-0.0180834	NaN	NaN	NaN	NaN	NaN	NaN	NaN	NaN	NaN
	0.0799303	NaN	NaN	NaN	NaN	NaN	NaN	NaN	NaN	NaN
	-0.0826934	NaN	NaN	NaN	NaN	NaN	NaN	NaN	NaN	NaN
	-0.0848331	NaN	NaN	NaN	NaN	NaN	NaN	NaN	NaN	NaN
	0.138255	NaN	NaN	NaN	NaN	NaN	NaN	NaN	NaN	NaN
	0.109476	NaN	NaN	NaN	NaN	NaN	NaN	NaN	NaN	NaN
	-0.119235	NaN	NaN	NaN	NaN	NaN	NaN	NaN	NaN	NaN
	-0.0691859	NaN	NaN	NaN	NaN	NaN	NaN	NaN	NaN	NaN
	0.0138998	NaN	NaN	NaN	NaN	NaN	NaN	NaN	NaN	NaN
	0.0715153	NaN	NaN	NaN	NaN	NaN	NaN	NaN	NaN	NaN
	-0.100077	NaN	NaN	NaN	NaN	NaN	NaN	NaN	NaN	NaN
	0.0862589	NaN	NaN	NaN	NaN	NaN	NaN	NaN	NaN	NaN
	-0.0145291	NaN	NaN	NaN	NaN	NaN	NaN	NaN	NaN	NaN
	0.0460801	NaN	NaN	NaN	NaN	NaN	NaN	NaN	NaN	NaN
	0.0683682	NaN	NaN	NaN	NaN	NaN	NaN	NaN	NaN	NaN
	-0.183952	NaN	NaN	NaN	NaN	NaN	NaN	NaN	NaN	NaN
	0.0848748	NaN	NaN	NaN	NaN	NaN	NaN	NaN	NaN	NaN
	0.115135	NaN	NaN	NaN	NaN	NaN	NaN	NaN	NaN	NaN
	0.213581	NaN	NaN	NaN	NaN	NaN	NaN	NaN	NaN	NaN
	0.00925249	NaN	NaN	NaN	NaN	NaN	NaN	NaN	NaN	NaN
	-0.008702	NaN	NaN	NaN	NaN	NaN	NaN	NaN	NaN	NaN
	0.0670941	NaN	NaN	NaN	NaN	NaN	NaN	NaN	NaN	NaN
	-0.0453486	NaN	NaN	NaN	NaN	NaN	NaN	NaN	NaN	NaN
	-0.0483791	NaN	NaN	NaN	NaN	NaN	NaN	NaN	NaN	NaN
	-0.109792	NaN	NaN	NaN	NaN	NaN	NaN	NaN	NaN	NaN
	0.0420557	NaN	NaN	NaN	NaN	NaN	NaN	NaN	NaN	NaN
	-0.0294924	NaN	NaN	NaN	NaN	NaN	NaN	NaN	NaN	NaN
	-0.0947768	NaN	NaN	NaN	NaN	NaN	NaN	NaN	NaN	NaN
	0.0421896	NaN	NaN	NaN	NaN	NaN	NaN	NaN	NaN	NaN
	-0.18739	NaN	NaN	NaN	NaN	NaN	NaN	NaN	NaN	NaN
	0.0133312	NaN	NaN	NaN	NaN	NaN	NaN	NaN	NaN	NaN
	0.00300208	NaN	NaN	NaN	NaN	NaN	NaN	NaN	NaN	NaN
	0.0425786	NaN	NaN	NaN	NaN	NaN	NaN	NaN	NaN	NaN
	-0.192761	NaN	NaN	NaN	NaN	NaN	NaN	NaN	NaN	NaN
	-0.119889	NaN	NaN	NaN	NaN	NaN	NaN	NaN	NaN	NaN
	-0.148571	NaN	NaN	NaN	NaN	NaN	NaN	NaN	NaN	NaN
	0.154197	NaN	NaN	NaN	NaN	NaN	NaN	NaN	NaN	NaN
	0.12917	NaN	NaN	NaN	NaN	NaN	NaN	NaN	NaN	NaN
	0.0621338	NaN	NaN	NaN	NaN	NaN	NaN	NaN	NaN	NaN
	0.0994442	NaN	NaN	NaN	NaN	NaN	NaN	NaN	NaN	NaN
	0.0449993	NaN	NaN	NaN	NaN	NaN	NaN	NaN	NaN	NaN
	-0.0582558	NaN	NaN	NaN	NaN	NaN	NaN	NaN	NaN	NaN
	0.114643	NaN	NaN	NaN	NaN	NaN	NaN	NaN	NaN	NaN
	-0.0384621	NaN	NaN	NaN	NaN	NaN	NaN	NaN	NaN	NaN
	0.287523	NaN	NaN	NaN	NaN	NaN	NaN	NaN	NaN	NaN
	-0.0127833	NaN	NaN	NaN	NaN	NaN	NaN	NaN	NaN	NaN
	0.258716	NaN	NaN	NaN	NaN	NaN	NaN	NaN	NaN	NaN
	-0.122939	NaN	NaN	NaN	NaN	NaN	NaN	NaN	NaN	NaN
	-0.0178291	NaN	NaN	NaN	NaN	NaN	NaN	NaN	NaN	NaN
	-0.206388	NaN	NaN	NaN	NaN	NaN	NaN	NaN	NaN	NaN
	-0.0557537	NaN	NaN	NaN	NaN	NaN	NaN	NaN	NaN	NaN
	-0.151466	NaN	NaN	NaN	NaN	NaN	NaN	NaN	NaN	NaN
	-0.0142227	NaN	NaN	NaN	NaN	NaN	NaN	NaN	NaN	NaN
	-0.0571678	NaN	NaN	NaN	NaN	NaN	NaN	NaN	NaN	NaN
	0.0253753	NaN	NaN	NaN	NaN	NaN	NaN	NaN	NaN	NaN
	0.0387398	NaN	NaN	NaN	NaN	NaN	NaN	NaN	NaN	NaN
	0.00137925	NaN	NaN	NaN	NaN	NaN	NaN	NaN	NaN	NaN
	-0.155667	NaN	NaN	NaN	NaN	NaN	NaN	NaN	NaN	NaN
	0.188247	NaN	NaN	NaN	NaN	NaN	NaN	NaN	NaN	NaN
	-0.0803541	NaN	NaN	NaN	NaN	NaN	NaN	NaN	NaN	NaN
	-0.199579	NaN	NaN	NaN	NaN	NaN	NaN	NaN	NaN	NaN
	0.0784447	NaN	NaN	NaN	NaN	NaN	NaN	NaN	NaN	NaN
	-0.0212567	NaN	NaN	NaN	NaN	NaN	NaN	NaN	NaN	NaN
	-0.313958	NaN	NaN	NaN	NaN	NaN	NaN	NaN	NaN	NaN
	0.00265372	NaN	NaN	NaN	NaN	NaN	NaN	NaN	NaN	NaN
	-0.0901117	NaN	NaN	NaN	NaN	NaN	NaN	NaN	NaN	NaN
	0.183435	NaN	NaN	NaN	NaN	NaN	NaN	NaN	NaN	NaN
	0.12943	NaN	NaN	NaN	NaN	NaN	NaN	NaN	NaN	NaN
	0.0105969	NaN	NaN	NaN	NaN	NaN	NaN	NaN	NaN	NaN
	0.126332	NaN	NaN	NaN	NaN	NaN	NaN	NaN	NaN	NaN
	0.147787	NaN	NaN	NaN	NaN	NaN	NaN	NaN	NaN	NaN
	-0.0169427	NaN	NaN	NaN	NaN	NaN	NaN	NaN	NaN	NaN
	-0.000518066	NaN	NaN	NaN	NaN	NaN	NaN	NaN	NaN	NaN
	0.00308777	NaN	NaN	NaN	NaN	NaN	NaN	NaN	NaN	NaN
	0.240211	NaN	NaN	NaN	NaN	NaN	NaN	NaN	NaN	NaN
	-0.0221172	NaN	NaN	NaN	NaN	NaN	NaN	NaN	NaN	NaN
	-0.11852	NaN	NaN	NaN	NaN	NaN	NaN	NaN	NaN	NaN
	0.06568	NaN	NaN	NaN	NaN	NaN	NaN	NaN	NaN	NaN
	0.145816	NaN	NaN	NaN	NaN	NaN	NaN	NaN	NaN	NaN
	0.247643	NaN	NaN	NaN	NaN	NaN	NaN	NaN	NaN	NaN
	0.00854977	NaN	NaN	NaN	NaN	NaN	NaN	NaN	NaN	NaN
	-0.0637397	NaN	NaN	NaN	NaN	NaN	NaN	NaN	NaN	NaN
	0.184254	NaN	NaN	NaN	NaN	NaN	NaN	NaN	NaN	NaN
	-0.0809315	NaN	NaN	NaN	NaN	NaN	NaN	NaN	NaN	NaN
	-0.0733198	NaN	NaN	NaN	NaN	NaN	NaN	NaN	NaN	NaN
	-0.00660254	NaN	NaN	NaN	NaN	NaN	NaN	NaN	NaN	NaN
	0.00300363	NaN	NaN	NaN	NaN	NaN	NaN	NaN	NaN	NaN
	-0.0271031	NaN	NaN	NaN	NaN	NaN	NaN	NaN	NaN	NaN
	-0.209307	NaN	NaN	NaN	NaN	NaN	NaN	NaN	NaN	NaN
	-0.040863	NaN	NaN	NaN	NaN	NaN	NaN	NaN	NaN	NaN
	-0.174754	NaN	NaN	NaN	NaN	NaN	NaN	NaN	NaN	NaN
	-0.285602	NaN	NaN	NaN	NaN	NaN	NaN	NaN	NaN	NaN
	0.0978359	NaN	NaN	NaN	NaN	NaN	NaN	NaN	NaN	NaN
	0.0579954	NaN	NaN	NaN	NaN	NaN	NaN	NaN	NaN	NaN
	-0.27938	NaN	NaN	NaN	NaN	NaN	NaN	NaN	NaN	NaN
	0.0252248	NaN	NaN	NaN	NaN	NaN	NaN	NaN	NaN	NaN
	-0.0851399	NaN	NaN	NaN	NaN	NaN	NaN	NaN	NaN	NaN
	-0.121297	NaN	NaN	NaN	NaN	NaN	NaN	NaN	NaN	NaN
	-0.273729	NaN	NaN	NaN	NaN	NaN	NaN	NaN	NaN	NaN
	-0.014161	NaN	NaN	NaN	NaN	NaN	NaN	NaN	NaN	NaN
	-0.0919072	NaN	NaN	NaN	NaN	NaN	NaN	NaN	NaN	NaN
	0.148466	NaN	NaN	NaN	NaN	NaN	NaN	NaN	NaN	NaN
	0.05807	NaN	NaN	NaN	NaN	NaN	NaN	NaN	NaN	NaN
	-0.0188413	NaN	NaN	NaN	NaN	NaN	NaN	NaN	NaN	NaN
	0.211312	NaN	NaN	NaN	NaN	NaN	NaN	NaN	NaN	NaN
	0.0816699	NaN	NaN	NaN	NaN	NaN	NaN	NaN	NaN	NaN
	0.0768815	NaN	NaN	NaN	NaN	NaN	NaN	NaN	NaN	NaN
	-0.207642	NaN	NaN	NaN	NaN	NaN	NaN	NaN	NaN	NaN
	-0.148318	NaN	NaN	NaN	NaN	NaN	NaN	NaN	NaN	NaN
	0.147918	NaN	NaN	NaN	NaN	NaN	NaN	NaN	NaN	NaN
	0.10774	NaN	NaN	NaN	NaN	NaN	NaN	NaN	NaN	NaN
	-0.0710104	NaN	NaN	NaN	NaN	NaN	NaN	NaN	NaN	NaN
	-0.0779449	NaN	NaN	NaN	NaN	NaN	NaN	NaN	NaN	NaN
	-0.0605436	NaN	NaN	NaN	NaN	NaN	NaN	NaN	NaN	NaN
	-0.0493283	NaN	NaN	NaN	NaN	NaN	NaN	NaN	NaN	NaN
	-0.0152972	NaN	NaN	NaN	NaN	NaN	NaN	NaN	NaN	NaN
	0.0644529	NaN	NaN	NaN	NaN	NaN	NaN	NaN	NaN	NaN
	-0.0561275	NaN	NaN	NaN	NaN	NaN	NaN	NaN	NaN	NaN
	0.091008	NaN	NaN	NaN	NaN	NaN	NaN	NaN	NaN	NaN
	0.0865964	NaN	NaN	NaN	NaN	NaN	NaN	NaN	NaN	NaN
	0.0165397	NaN	NaN	NaN	NaN	NaN	NaN	NaN	NaN	NaN
	0.104948	NaN	NaN	NaN	NaN	NaN	NaN	NaN	NaN	NaN
	0.0875358	NaN	NaN	NaN	NaN	NaN	NaN	NaN	NaN	NaN

## Sheet: Observed
Up fm	Step down	Flat	Short	Complex	Chevron	Two step	Multi step	Step up	Down fm
-0.883675	0.30495	0.565715	0.298887	0.408391	0.433294	0.643827	0.179588	-0.853841	0.624603
-0.226872	0.0407225	0.313855	0.429935	0.731612	0.2558	-0.00545499	0.718019	-0.248654	0.979428
-0.529013	0.542898	-0.621706	0.773222	0.1483	0.661357	0.181975	0.224042	0.0450828	0.960069
0.948643	0.668082	-0.115139	-0.979523	0.727574	-0.24053	0.00329787	0.46699	-0.932448	0.748727
-0.255208	0.801016	-0.245203	0.151491	0.589153	0.0665523	0.171094	-0.652216	-0.916665	0.985054
-0.795599	0.728212	0.468138	0.576134	0.495679	-0.0960838	-0.245293	0.543964	-0.614355	-0.423541
0.205629	0.823432	0.837354	0.889532	0.242461	0.17998	0.00634104	-0.0301233	-0.45794	0.86767
-0.69819	-0.597391	-0.931669	-0.936261	0.706776	0.30976	0.727455	0.221549	-0.883539	0.0431684
0.695215	0.111846	0.162552	-0.982323	0.836673	0.500188	0.321914	-0.432379	-0.0328209	-0.263125
0.697436	0.822808	-0.364396	0.129923	0.43331	0.755894	0.696978	-0.501775	0.0903823	-0.211199
0.292022	0.75452	0.120681	-0.495498	0.763483	0.695176	-0.615202	0.0686342	0.0172772	-0.84066
-0.592488	0.512537	-0.761521	0.818263	0.571302	0.852741	-0.301734	0.212823	-0.298092	0.650396
-0.776422	0.830847	-0.20344	-0.0675044	0.193615	0.617778	0.419487	0.454835	-0.662045	0.115213
-0.709222	0.0149856	0.16936	-0.453531	0.589318	0.778429	0.259672	-0.136544	0.341905	0.925861
-0.982556	-0.472674	-0.3683	0.944744	0.113156	0.705566	-0.282093	0.2667	0.156624	0.908225
0.398782	-0.66259	-0.798547	-0.81997	0.471895	0.275028	-0.290888	-0.0341955	-0.71174	0.572155
-0.841218	-0.0633762	0.883855	-0.975436	0.699721	0.664162	0.479411	0.406106	-0.518595	0.923867
-0.965399	0.00412263	0.561536	0.971956	0.304401	0.897835	0.0919466	0.0495372	-0.789538	0.677508
-0.697862	0.23022	0.258176	-0.0280482	-0.0289255	-0.908469	-0.590522	0.441383	-0.212712	-0.612124
-0.645215	0.821735	0.331445	-0.421712	0.116828	0.786665	0.225749	-0.936705	-0.495279	0.473622
-0.80524	0.803048	-0.823175	-0.925977	0.386828	0.918212	0.173024	-0.417456	0.344081	0.782823
-0.959155	0.402927	-0.780149	0.443018	-0.0885623	0.495356	-0.10418	0.321902	0.366415	0.649863
-0.664638	0.531774	-0.35576	0.919771	0.780782	0.747577	0.155052	0.268081	-0.701958	-0.75623
0.945273	-0.0390635	0.662453	0.0494223	-0.0797807	-0.501554	-0.0442649	0.0930997	0.19906	0.805243
-0.96575	0.616736	-0.892162	-0.442802	-0.00602019	-0.0606877	0.298767	0.240199	0.0228379	0.322361
-0.5495	0.136581	0.0851331	0.992073	0.449525	0.790544	-0.00443828	0.0832977	-0.38572	0.869992
0.433276	0.460389	-0.0813741	0.932355	0.312562	0.785065	0.65204	-0.0545504	-0.866866	0.439355
-0.914265	-0.0592176	-0.163771	-0.806771	0.856105	0.28651	0.157809	-0.602379	0.0497148	-0.186933
0.511745	-0.0954881	-0.714461	0.108075	0.146994	0.640168	0.356254	0.275568	-0.0953715	-0.70041
0.467023	0.811171	-0.844061	-0.0116449	0.347406	0.00382303	-0.547152	-0.272055	-0.883267	0.950347
-0.889042	0.253057	0.672986	0.957619	0.0801374	-0.303629	0.646397	0.341443	-0.923878	0.77074
0.926651	-0.576022	0.957107	-0.609159	-0.15332	-0.112992	-0.34461	0.262958	-0.918309	0.878728
-0.731395	-0.399013	-0.041666	0.888028	-0.277654	0.594528	0.355469	0.140426	-0.805154	0.0992774
0.228209	0.58195	0.243652	0.878571	0.603661	0.695906	-0.165771	0.00300373	-0.919272	0.849839
-0.982763	0.445974	0.814784	0.82066	-0.194375	0.530454	0.292275	0.196461	-0.76736	0.961638
-0.984114	0.516412	-0.651848	-0.0340933	0.33263	0.847449	0.364717	0.241942	0.907769	0.265861
-0.960875	-0.0130862	-0.768188	0.82985	0.278562	0.334519	0.47345	0.0329094	-0.868361	0.569499
-0.53932	0.188664	-0.741193	0.720705	-0.0705226	-0.184954	-0.629533	-0.108059	0.555861	0.192425
0.596246	0.605787	-0.253892	-0.941145	0.253091	0.950962	-0.242798	-0.566922	0.696647	0.834095
0.86369	-0.111529	-0.620879	-0.905288	-0.184335	-0.074016	0.197033	-0.0312412	0.437185
0.850475	0.26123	0.806619	-0.617361	0.263274	-0.463277	0.475202	-0.305881
0.0872519	0.584233	0.391425	0.720016	0.331228	0.483788	0.129766	0.186694
-0.913257	0.146678	-0.273393	-0.605982	0.0567491	0.322973	0.0837419	0.747401
0.784066	0.876755	-0.550968	0.860368	0.322295	0.392127	0.207533	0.480912
-0.804219	0.605723	-0.784479	0.742552	0.527826	-0.0733577	-0.27472	0.541891
0.6183	0.709624	-0.67954	-0.918416	0.66418	-0.0183012	0.0520108	-0.222847
-0.925305	0.398735	-0.890893	0.675586	0.160198	0.0376776	-0.711561	0.174237
-0.252884	0.661686	-0.782118	0.87899	-0.469678	0.268633	0.648759	0.515053
0.935649	0.954342	-0.365167	0.135627	0.712807	-0.638966	-0.0245518	0.507322
-0.948142	0.913385	-0.485477	-0.495542	0.109956	-0.0819137	0.325668	0.594743
-0.834378	0.799298	0.345953	-0.97254	0.2312	-0.174406	-0.763075	0.604643
-0.711968	-0.475165	0.39454	0.929278	-0.472464	0.662332	-0.128724	0.3583
-0.0505168	-0.00184608	0.581142	-0.85773	0.23518	0.154343	-0.142098	0.445778
-0.747181	0.942336	0.478941	-0.714052	-0.620011	-0.194439	0.185269	0.453717
0.511233	0.907109	-0.695173	0.787204	0.213808	-0.505726	0.442693	0.279671
-0.204527	-0.542966	-0.3227	-0.891196	-0.339877	0.276668	0.749671	0.167499
-0.304006	0.519752	0.869136	0.783965	0.12842	-0.524663	-0.255845	0.355013
0.347992	0.538641	-0.961799	-0.525461	-0.396293	-0.0458232	-0.521577	0.260088
0.784601	0.721747	0.675404	-0.892384	-0.00860316	0.943628	0.36227
-0.417857	-0.247373	-0.913032	-0.947669	0.0814602	0.59757	0.835405
-0.382514	-0.609236	0.703024	0.783367	0.246449	-0.19008	0.458438
-0.410981	0.40741	0.503671	-0.502065	-0.222059	0.544025
0.447024	0.832203	0.729574	-0.939937	0.721034	0.415442
0.427433	-0.431508	-0.387411	0.991399	0.430723	0.00654801
-0.777467	-0.357759	-0.4822	-0.643939	-0.605696	0.437552
0.531111	0.0252782	-0.845212	-0.3763	0.334771	-0.573094
-0.92091	-0.400993	-0.554379	-0.945086	0.479879	0.68569
-0.0619207	0.231888	-0.832265	-0.952878	-0.0100376	-0.122286
0.659279	0.353567	-0.523042	-0.059712	0.528233	0.252189
0.716384	-0.138044	-0.787382	-0.75541	0.109452	0.660709
0.32856	0.150059	-0.151409	-0.767409	0.368316	-0.340848
-0.0809939	0.431822	0.373357	-0.1356	0.275282	-0.482067
0.772077	0.117981	-0.105253	0.567802	-0.115905	0.865268
0.708343	-0.438227	0.834431	0.800357	-0.774813	0.363629
-0.0175817	0.795695	-0.91772	0.144369	-0.00874021	0.292176
0.670587	0.487072	-0.148393	-0.445656	-0.20949	0.538913
0.0769277	0.362366	0.848237	0.800175	0.803677	0.00725769
0.07275	0.497455	-0.967415	0.940661	0.552945	0.131004
0.0705909	0.426459	0.691745	-0.160547	0.674345	-0.102369
0.291839	-0.153904	0.747704	-0.961502	0.535043	0.96756
0.323471	0.509794	0.838524	0.497968	0.305015	0.254861
-0.77765	0.698808	0.0118515	-0.806097	0.884072	0.123707
0.733443	0.31648	0.820599	0.590334	0.74046	0.262159
0.702106	0.428667	0.777395	0.00904041	0.70602	0.0741578
-0.636428	0.381197	-0.896933	0.860895	0.700054	0.225165
0.171135	0.621613	0.765127	0.856757	0.540575	0.753421
0.547062	0.65513	-0.959098	-0.842457	0.380415	0.0702119
0.503872	0.642436	0.840346	-0.71024	0.765553	0.0949001
0.436989	0.292687	0.904994	0.692836	0.833189	-0.108087
-0.0256945	0.665004	0.419426	-0.972257	0.854636	0.0682458
-0.192321	0.795939	-0.862124	-0.96947	0.144764	-0.540079
0.42812	0.76408	-0.420813	-0.941438	0.811847	0.575393
-0.828544	-0.939289	-0.959226	-0.958951	0.0610708	0.648112
-0.104527	0.494383	-0.673495	0.30207	0.556472	0.0138057
-0.360216	0.358874	0.386158	-0.898473	0.0837133	0.0465221
-0.193258	0.70787	-0.343851	-0.824295	0.626178	0.490012
-0.783386	0.796723	-0.921182	0.951141	-0.326047	0.909314
0.182499	0.256226	0.573586	0.689384	0.116934	0.727346
-0.256335	-0.696101	-0.598576	-0.938174	0.0721355	0.989619
-0.653654	0.108646	0.672304	-0.931034	0.334992
-0.249047	-0.15835	-0.815221	-0.723974	-0.106439
0.409094	0.643294	-0.16621	0.640059	0.547203
0.443687	-0.323665	-0.342221	0.808333	0.579563
0.843685	0.402528	-0.746166	-0.691835	0.288387
0.0292325	0.387638	0.275386	-0.74973	0.544892
-0.935886	0.152224	-0.22069	-0.0544884	0.722929
-0.914104	-0.0258226	-0.187376	-0.90684	0.0434724
-0.411197	0.319438	-0.516823	-0.616713	0.666873
0.691035	0.563784	0.113556	0.221915	0.754751
0.701278	0.0765676	0.725297	0.68641	-0.359233
-0.956228	0.000838772	0.608415	-0.870544	0.0281499
0.564956	0.542343	-0.0442872	-0.762061	0.70484
-0.656987	0.242793	0.680769	-0.871763	0.476554
-0.979149	-0.109042	-0.428295	0.521485	0.189048
-0.501753	0.547146	-0.375897	0.964006	0.000267842
-0.97847	-0.39092	-0.141884	-0.923138	-0.558467
0.818044	-0.075367	0.661604	-0.197974	-0.176934
0.494859	0.254192	0.585224	-0.456481	0.486713
0.0710786	0.590764	0.81748	-0.912731	0.586009
-0.554269	0.110181	-0.497384	0.214113	0.488963
-0.937355	-0.405381	0.354579	-0.71512	0.451495
-0.686018	-0.0485195	-0.653175	-0.305081	-0.20682
-0.867061	0.831461	-0.519334	-0.643825	0.0716971
-0.494445	-0.282562	0.711885	-0.608405	0.819249
-0.735843	0.352486	0.756242	0.888666	0.396793
-0.479371	0.0637421	0.663543	-0.946291	0.75315
0.320534	-0.197691	-0.759216	0.765691	0.57545
-0.919258	-0.340429	0.790671	-0.925122	0.596403
-0.556052	0.798958	0.651761	0.708857	0.396689
0.442173	0.140812	-0.183515	-0.862116	-0.308816
-0.97371	0.308604	0.600286	-0.2721	-0.0124399
0.454816	-0.2113	0.840267	0.749143	0.590333
0.532567	0.22131	0.495809	0.238149	0.0547533
-0.269247	0.814531	0.833455	0.961676	-0.0834187
-0.980821	0.277855	0.240787	-0.0643417	-0.330637
-0.242977	0.243871	-0.444891	0.371825	0.34954
-0.845217	0.293171	0.803734	-0.90647	0.0857878
0.741272	0.194748	0.757199	-0.942157	0.315759
-0.904432	-0.528004	-0.428079	-0.901667	0.344796
0.57739	-0.397079	0.673928	-0.463742	0.827962
-0.686479	-0.115416	0.807656	-0.929768	0.53281
-0.955592	0.541327	-0.517764	0.0280073	-0.346057
0.947633	-0.294823	-0.930667	-0.937535	0.643352
-0.706225	0.232407	-0.0756318	-0.494238	0.775319
0.508644	-0.13331	-0.708973	-0.951962	0.686891
0.240442	-0.213053	0.861976	-0.973989	-0.361058
-0.00741476	0.440155	-0.0102373	-0.894436	-0.0326342
-0.756075	-0.0712576	-0.172246	-0.00940094	0.093744
0.236135	-0.539362	0.250312	-0.837083	0.305415
0.61133	0.325104	-0.824702	0.273796	0.0904752
-0.565888	-0.460881	-0.775377	-0.827714	0.59467
-0.885046	0.122286	-0.201709	-0.853471	-0.0594388
-0.907141	-0.127	-0.610991	0.799596	0.348588
-0.750255	-0.499622	-0.875137	0.362639	0.218188
-0.798522	0.281204	-0.922966	-0.149512	0.561569
-0.838611	0.674225	-0.878874	0.910554	0.346866
0.164971	0.326932	-0.894288	-0.932306	0.0101743
-0.0762661	-0.388372	-0.063553	-0.791768	0.287408
-0.924591	-0.148897	-0.400857	0.855372	0.913948
-0.158426	0.128958	-0.854863	0.46679	0.811929
0.0883526	-0.382243	0.491249	-0.748789	0.586106
-0.0381113	0.142727	0.227042	-0.880223	0.600698
-0.986814	-0.152531	0.734911	0.884352	0.725267
0.473947	0.307643	-0.95725	-0.709902	0.312147
-0.830878	-0.616581	-0.567414	0.923971	0.199342
-0.495474	0.538467	-0.368328	0.44195
-0.245054	0.113722	-0.0303011	0.926728
0.927762	-0.0246276	0.79103	-0.843294
-0.845742	-0.144809	0.539645
-0.602651	-0.411794	0.536608
-0.68069	0.2181	-0.844872
-0.911965	-0.541401	-0.962097
-0.945014	-0.155837	-0.903762
-0.0324379	0.78529	-0.505724
-0.895381	-0.388417	-0.62975
0.0699574	0.748568	-0.522699
0.0930575	0.434441	-0.811068
-0.961359	0.627585	0.028165
0.54062	0.288112	-0.0501979
-0.109626	0.0706458	-0.823484
-0.865319	0.178847	0.740607
0.0363982	0.575957	-0.740602
-0.114198	-0.00300942	0.856245
-0.925656	0.602884	0.786122
0.517175	-0.157924	0.89632
0.558189	0.157839	0.732183
-0.876149	0.368645	-0.791043
-0.147649	-0.557211	-0.939826
-0.838996	-0.0200256	0.936994
-0.651178	-0.391791	-0.80928
0.149088	-0.069437	0.0520506
-0.964432	0.161229	0.909353
-0.518138	0.175696	0.479716
-0.155799	0.542325	-0.0982867
-0.93296	0.564618	-0.0750161
-0.150238	0.125917	0.121028
-0.797946	0.138241	-0.706688
0.399426	0.192781	-0.824891
-0.671165	0.367774	0.628914
-0.217331	-0.378375	-0.405552
-0.74623	0.921609	-0.718999
0.298272	0.929717	-0.530928
-0.0604201	-0.106444	-0.886642
0.609149	0.0627604	0.154321
-0.790048	0.739819	-0.479545
-0.399438	0.516899	0.145465
-0.933087	0.305384	-0.113225
-0.965136	0.482237	0.29715
-0.995856	0.0965365	-0.20636
0.553667	0.590895	-0.976981
-0.990105	0.893656	0.367962
0.20762	-0.0337298	0.660502
-0.979786	0.349184	0.000876425
-0.923014	0.252944	-0.0245183
-0.600897	0.337045	-0.00928309
0.354305	0.0178714	-0.911287
-0.618032	0.374302	-0.948893
-0.79578	-0.283598	0.499371
0.990019	-0.258552	-0.738325
0.800669	-0.572372	-0.561708
-0.657104	0.830529	-0.936202
-0.879349	0.906273	0.905604
0.955357	0.838071	-0.778839
-0.904131	0.48819	0.620332
-0.964665	0.653674	-0.0156478
-0.889873	0.495951	0.169756
-0.874917	0.665608	-0.153369
-0.986435	0.81523	0.843997
0.578533	0.607239	-0.227238
-0.951768	0.561152	-0.839471
-0.929333	0.604376	-0.440198
-0.969236	0.0340779	-0.150535
-0.955384	-0.418088	-0.597773
-0.602279	-0.280858	0.0296876
-0.223118	0.499294	0.90878
-0.851538	-0.0573404	-0.638277
-0.948334	0.686321	-0.795786
-0.776919	0.291649	-0.338845
-0.967081	0.11183	-0.00595647
-0.974244	0.28964	0.672201
-0.928457	0.592658	0.895399
-0.936726	0.810846	-0.3791
0.0857981	0.226156	0.244291
-0.939499	0.57089	0.340494
-0.518236	-0.277211	-0.771709
0.271425	0.0638926	0.437757
-0.889513	0.650246	-0.229024
-0.927407	0.681481	0.304113
-0.505117	-0.159429	-0.919651
-0.961031	0.316052	-0.81337
-0.987524	-0.18664	-0.615512
-0.694937	0.462392	-0.859224
-0.895412	0.686277	0.485671
0.0458607	0.64871	-0.00357797
-0.276146	0.0595567	0.848146
-0.622272	0.845791	0.57282
0.531619	0.660365	0.509146
-0.0986175	-0.00173497	-0.622794
-0.802031	0.623015	0.883626
-0.95711	0.38592	-0.222348
-0.827446	0.624252	0.934008
-0.974687	0.545657	-0.559801
-0.0402937	0.550292	-0.821514
-0.893362	-0.150912	0.0385641
-0.965101	0.728271	0.926002
-0.981206	0.311311	-0.561441
-0.946843	0.187322	-0.0632448
-0.582659	0.551548	-0.352343
-0.979877	0.446731	-0.145455
-0.11634	-0.449916	0.482081
-0.962554	0.312549	-0.458821
-0.971527	0.790255	-0.577818
-0.971598	-0.23431	-0.221692
-0.972796	0.502619	0.928223
-0.949816	0.919253	0.381382
-0.886837	0.323597	-0.323102
-0.56506	0.477786	-0.31586
-0.577727	0.666551	-0.187282
-0.952334	0.240562	0.311725
-0.849082	0.6188	-0.940049
-0.879506	-0.618368	-0.529082
-0.687598	0.382266	0.829657
-0.976301	0.720599	0.950994
-0.912157	-0.0427103	-0.694674
-0.974246	0.0894547	-0.905425
0.774107	0.832753	-0.0227995
-0.394142	0.854512	-0.712674
-0.836286	0.156436	0.753096
-0.945738	0.826978	-0.513002
-0.971952	0.127205	0.747209
-0.994676	0.267813	0.471239
-0.843071	-0.00122985	0.125329
-0.790826	0.0670408	0.1413
-0.988845		0.721407
-0.34389		-0.372971
-0.752981		0.537553
-0.948079		0.455484
-0.91083		-0.456075
-0.767265		-0.607145
-0.406071		0.303506
-0.732995		0.0815488
0.161453		0.956683
-0.979		0.637575
0.512103		0.229144
-0.979881		-0.283693
-0.952485		-0.673877
-0.308209		-0.0355868
-0.428395		-0.978866
-0.0604882		0.669525
0.0451532		-0.146068
-0.65641		-0.656877
-0.298507		0.74909
-0.985989		0.655633
-0.562328		-0.128476
-0.432894		0.319194
-0.98712		0.439849
-0.982201		-0.955708
-0.947769		-0.0579528
-0.247712		-0.053886
-0.919336		0.800996
0.739039		-0.473658
0.148372		0.689567
-0.828755		-0.508534
-0.571473		-0.448458
0.805921		0.324628
0.677107		-0.0859
-0.57085		-0.542625
-0.950573		0.145382
0.88512		-0.92001
-0.463283		0.578436
-0.952307		-0.318006
0.765403		-0.428111
0.50339		0.12072
-0.876973		0.208509
0.571585		-0.881809
0.758084		-0.82431
-0.271512		-0.0892504
0.352458
-0.216665
-0.296046
-0.966144
-0.965561
0.608
0.651661
-0.97883
0.808477
0.427277
0.755351
-0.630528
-0.855124
0.964355
-0.654482
-0.0694084
-0.933988
0.221841
0.245747
-0.504894
-0.1389
-0.497988
-0.446593
-0.839363
-0.0779672
0.0917734
-0.464581
-0.0325854
-0.505773
0.0117334
-0.285525
-0.977746
-0.935989
-0.943714
-0.928775
-0.959762
-0.268986
-0.6609
-0.543095
-0.510286
-0.249801
-0.972614
0.149681
0.507522
-0.323977
-0.158029
0.604782
-0.643699
-0.85095
0.447146
-0.477657
-0.870094
-0.774685
-0.227002
-0.438557
0.590867
-0.804778
0.280817
-0.909386
0.122053
0.531936
-0.751999
-0.901322
-0.89289
-0.558491
-0.828945
-0.762711
-0.609774
0.564595
0.0909632
-0.370189
-0.84936
0.57641
0.274087
-0.427065
0.172514
-0.949009
-0.272357
-0.732066
-0.0994726
-0.706883
0.667303
-0.669834
-0.693411
-0.886947
0.383517
-0.956113
-0.356664
-0.801135
-0.951271
0.168692
-0.852247
-0.927586
-0.291526
-0.727398
-0.919681
-0.620858
-0.868564
-0.517742
-0.983191
0.330023
-0.985062
-0.97116
-0.987806
-0.976236
-0.439911
0.146785
-0.982259
0.823933
-0.0414469
0.651041
-0.0405037
-0.251472
-0.907836
-0.854252
-0.900745
0.0297789
0.942212
0.0483639
0.664078
-0.675035
-0.893462
-0.88631
-0.781987
-0.973676
-0.754066
-0.893826
0.501921
-0.950379
-0.868775
-0.817413
0.267982
0.888665
-0.0370815
-0.986328
0.425084
-0.457547
-0.921822
-0.757289
-0.780101
-0.974055
0.56537
0.53182
-0.98256
-0.715505
-0.697414
0.147118
-0.930309
-0.877553
-0.25293
0.458204
0.741431
0.81324
-0.574935
-0.910961
-0.913943
-0.870808
-0.669093
-0.922228
-0.62171
-0.86064
0.592985
-0.178239
-0.482969
-0.89449
-0.966192
-0.781465
-0.991925
-0.644725
-0.702454
-0.612622
-0.9878
0.382349
-0.856783
-0.733888
-0.600898
-0.831564
-0.849647
-0.662169
-0.888769
-0.108168
-0.766234
-0.32299
-0.963203
-0.831989
-0.626261
0.97623
-0.328741
-0.242189
-0.387843
0.7368
-0.365707
0.839388
0.43512
0.885729
0.632904
0.824767
0.190066
0.437056
0.461736
-0.630191
-0.182871
0.369078
-0.190103
-0.561713
-0.0490487
0.688283
0.855154
0.769496
-0.278642
0.594079
-0.734166
-0.514253
0.207801
0.521737
-0.338748
0.937788
0.916937
0.934598
-0.913087
0.185029
-0.242454
0.411182
-0.895114
0.471932
-0.761751
-0.361593
0.532628
0.177403
-0.099381
-0.872415
-0.449276
-0.364034
-0.967667
-0.902137
0.772569
-0.0378834
-0.418199
0.517901
-0.841286
-0.381055
-0.871712
-0.97451
-0.401166
0.73108
-0.569267
0.0499792
-0.787941
0.525697
0.793738
0.175905
-0.915086
