# Supplementary material for: The breath shape controls intonation of mouse vocalizations
Source: eLife. 2024 Jul 4;13:RP93079. doi: 10.7554/eLife.93079 (PMC11223766; doi:10.7554/eLife.93079)
Supplement: Figure 3—source data 1. [file elife-93079-fig3-data1.xlsx]

## Sheet: Complex
Vocalization Name	Norm Larynx Peak 1	Norm Diaphragm Peak 1	Norm Larynx Peak 2	Norm Diaphragm Peak 2	Norm Larynx Peak 3	Norm Diaphragm Peak 3	Norm Larynx Peak 4	Norm Diaphragm Peak 4	Norm Diaphragm Peak 5	Norm Larynx Peak 5
2_38	0	0.0555556		0.228395	0.339506	0.419753	0.518519	0.555556	0.716049
2_51	0	0.0642202		0.12844		0.385321	0.440367	0.550459		0.633028
1_54	0	0.217877	0.25419	0.374302	0.511173	0.614525	0.712291	0.759777
2_48	0	0.102362		0.244094	0.535433	0.771654		0.771654
1_66	0	0.0272727		0.204545	0.486364	0.568182		0.786364		0.909091
1_39	0	0.0753425		0.349315	0.410959	0.5		0.842466		0.835616
1_42	0.0679012	0.0246914		0.246914	0.41358	0.58642
1_34	0.0451128	0.165414	0.37594	0.473684		0.631579
2_42	0	0.226368	0.256219	0.365672	0.604478	0.679104
1_8	0.00649351	0.230519	0.451299	0.483766	0.613636	0.685065
1_65	0	0.0327869		0.26776	0.655738	0.770492
1_16	0	0.0842105		0.310526	0.621053	0.773684	0.873684
1_51	0	0.243655		0.467005	0.568528	0.781726	0.923858
1_46	0	0.0322581		0.290323	0.419355	0.784946	0.946237
2_30	0	0.25969	0.445736	0.515504	0.596899	0.794574
1_30	0	0.247788	0.342183	0.477876	0.719764	0.80826
1_38	0.288136	0.305085	0.305085	0.521186	0.622881	0.826271
2_22	0	0.172043	0.293907	0.573477	0.659498	0.83871	0.989247
2_45	0	0.239286	0.317857	0.560714	0.753571	0.867857
1_59	0	0.269231	0.361538	0.492308	0.738462	0.915385
1_91	0.0384615	0.391026	0.634615	0.711538	0.903846	0.955128
1_17	0	0.309735	0.654867	0.778761
1_18	0	0.222222	0.588889	0.666667
1_19	0	0.149733	0.59893	0.759358
1_20	0	0.262295	0.614754	0.803279
1_23	0	0.267677	0.580808	0.813131
1_26	0	0.126437	0.551724	0.804598
1_27	0	0.168033	0.434426	0.528689	0.717213
1_28	0	0.113971	0.536765	0.617647	0.838235
1_33	0	0.204724	0.559055	0.661417
1_37	0	0.191057	0.597561	0.752033
1_63	0	0.241706	0.582938	0.725118
1_64	0	0.0961538	0.619231	0.75
1_76	0	0.222222	0.544444	0.6
1_84	0	0.240196	0.568627	0.79902
1_90	0	0.212389	0.39823	0.575221	0.619469
2_24	0	0.173729	0.419492	0.529661	0.690678
2_31	0	0.212	0.496	0.716	0.832
2_39	0	0.213793	0.475862	0.786207
2_49	0	0.136752	0.452991	0.487179
2_50	0	0.169565	0.465217	0.595652
2_56	0	0.231707	0.536585	0.743902
2_57	0	0.162393	0.470085	0.65812

## Sheet: Down FM
Name	Norm Larynx Peak 1	Norm Diaphragm Peak 1	Norm Vocal Onset	Vocal Offset
1_1	0.226667	0.226667	0.253333	0.913333
1_3	0	0.113208	0.367925	0.877358
1_4	0	0.218391	0.632184	0.83908
1_5	0	0.22	0.495	1
1_6	0.383721	0.267442	0.47093	0.651163
1_7	0	0.409091	0.537879	0.69697
1_9	0.471264	0.287356	0.574713	0.770115
1_10	0.790323	0.725806	0.782258	0.951613
1_11	0.280303	0.424242	0.19697	0.560606
1_12	0	0.410256	0.589744	0.961538
1_13	0	0.17284	0.469136	1
1_14	0.506329	0.21519	0.189873	0.411392
2_2	0.302083	0.09375	0.588542	0.848958
2_3	0.405405	0.306306	0.54955	0.657658
2_4	0.341463	0.170732	0.463415	0.70122
2_5	0.34375	0.302083	0.447917	0.947917
2_6	0.120879	0.043956	0.175824	0.373626
2_7	0	0.15	0.5375	0.9875
2_8	0.345794	0.280374	0.369159	0.742991
2_9	0.0224719	0.0224719	0.117978	0.398876
2_10	0.566667	0.0888889	0.383333	0.677778
2_11	0.164706	0.152941	0.223529	0.541176
2_12	0.295918	0.295918	0.438776	0.576531

## Sheet: Up FM
Name	Norm Diaphragm Peak 1	Norm Diaphragm Peak 2	Norm Vocal Onset	Vocal Offset
1	0.34		0.12	0.46
2	0.421875		0.164062	0.335938
3	0.36		0.115	0.35
4	0.327273		0.2	0.490909
5	0.116667	0.383333	0.133333	0.35
6	0.228571		0.314286	0.685714
7	0.442623		0.131148	0.47541
8	0.309091		0.236364	0.454545
9	0.21519		0.0886076	0.28481
10	0.258065		0.120968	0.370968
11	0.09375	0.4375	0.109375	0.382812
12	0.264368		0.155172	0.396552
13	0.228916		0.0662651	0.307229
14	0.101266	0.493671	0.0886076	0.398734
15	0.308642		0.191358	0.314815
16	0.256757	0.635135	0.148649	0.493243
20	0.416667		0.108333	0.508333
22	0.203125		0.210938	0.40625
23	0.223881	0.328358	0.134328	0.432836
24	0.174699		0.120482	0.271084
25	0.217742		0.153226	0.322581
26	0.118421		0.138158	0.335526
27	0.311475		0.180328	0.47541
28	0.289855		0.108696	0.391304
29	0.183333		0.125	0.408333
30	0.151515	0.484848	0.143939	0.325758
31	0.355556		0.183333	0.311111
32	0.652174		0.163043	0.847826
33	0.183333		0.208333	0.433333
