# Supplementary material for: The breath shape controls intonation of mouse vocalizations
Source: eLife. 2024 Jul 4;13:RP93079. doi: 10.7554/eLife.93079 (PMC11223766; doi:10.7554/eLife.93079)
Supplement: Figure 4—source data 1. [file elife-93079-fig4-data1.xlsx]

## Sheet: Sheet1
91800	DMPAG	DLPAG	LPAG	VLPAG	DRN			91800	DMPAG	DLPAG	LPAG	VLPAG	DRN
Ipsi	0	0	3	4	0			Ipsi	0	0	0.166667	0.222222	0
Contra	0	0	3	8	0	18		Contra	0	0	0.166667	0.444444	0
91801	DMPAG	DLPAG	LPAG	VLPAG	DRN			91801	DMPAG	DLPAG	LPAG	VLPAG	DRN
Ipsi	0	0	6	17	1			Ipsi	0	0	0.146341	0.414634	0.0243902
Contra	0	0	3	14	0	41		Contra	0	0	0.0731707	0.341463	0
91801	DMPAG	DLPAG	LPAG	VLPAG	DRN			91801	DMPAG	DLPAG	LPAG	VLPAG	DRN
Ipsi	0	0	5	9	1			Ipsi	0	0	0.217391	0.391304	0.0434783
Contra	0	0	0	8	0	23		Contra	0	0	0	0.347826	0
