# Supplementary material for: The breath shape controls intonation of mouse vocalizations
Source: eLife. 2024 Jul 4;13:RP93079. doi: 10.7554/eLife.93079 (PMC11223766; doi:10.7554/eLife.93079)
Supplement: Figure 5—source data 1. [file elife-93079-fig5-data1.xlsx]

## Sheet: 4C
Endo
Raw	UFM	FLAT	STEP DOWN	SHORT	COMPLEX	CHEV	TWO STEP	DFM	STEP UP	MULTI STEP	All
Mouse 1	71	56	72	64	28	13	12	17	14	14	361
Mouse 2	205	139	63	62	46	31	13	2	10	3	574
Mouse 3	154	51	47	21	41	28	26	19	7	21	415
Mouse 4	36	11	2	5	2	9	2	0	7	0	74
Mouse 5	56	42	88	10	14	10	3	0	0	4	227
Mouse 6	67	38	21	6	34	8	5	2	2	16	199
Total	589	337	293	168	165	99	61	40	40	58	1850
Norm	UFM	FLAT	STEP DOWN	SHORT	COMPLEX	CHEV	TWO STEP	DFM	STEP UP	MULTI STEP	All
Mouse 1	0.196676	0.155125	0.199446	0.177285	0.0775623	0.0360111	0.033241	0.0470914	0.0387812	0.0387812	1
Mouse 2	0.357143	0.24216	0.109756	0.108014	0.0801394	0.054007	0.0226481	0.00348432	0.0174216	0.00522648	1
Mouse 3	0.371084	0.122892	0.113253	0.0506024	0.0987952	0.0674699	0.0626506	0.0457831	0.0168675	0.0506024	1
Mouse 4	0.486486	0.148649	0.027027	0.0675676	0.027027	0.121622	0.027027	0	0.0945946	0	1
Mouse 5	0.246696	0.185022	0.387665	0.0440529	0.061674	0.0440529	0.0132159	0	0	0.0176211	1
Mouse 6	0.336683	0.190955	0.105528	0.0301508	0.170854	0.040201	0.0251256	0.0100503	0.0100503	0.080402	1
Opto
Raw	UFM	FLAT	STEP DOWN	SHORT	COMPLEX	CHEV	TWO STEP	DFM	STEP UP	MULTI STEP	All
Mouse 1	11	26	18	14	0	4	0	104	8	0	185
Mouse 2	4	7	20	9	1	6	2	107	7	0	163
Mouse 3	0	1	0	4	0	0	0	31	0	0	36
Mouse 4	2	0	1	2	0	1	0	5	0	0	11
Norm	UFM	FLAT	STEP DOWN	SHORT	COMPLEX	CHEV	TWO STEP	DFM	STEP UP	MULTI STEP	All
Mouse 1	0.0594595	0.140541	0.0972973	0.0756757	0	0.0216216	0	0.562162	0.0432432	0	1
Mouse 2	0.0245399	0.0429448	0.122699	0.0552147	0.00613497	0.0368098	0.0122699	0.656442	0.0429448	0	1
Mouse 3	0	0.0277778	0	0.111111	0	0	0	0.861111	0	0	1
Mouse 4	0.181818	0	0.0909091	0.181818	0	0.0909091	0	0.454545	0	0	1

## Sheet: 4D-G
All		Up fm		Step down		Flat		Short		Complex		Chevron		Two step		Multi step		Step up		Down fm
Endo	Opto	Endo	Opto	Endo	Opto	Endo	Opto	Endo	Opto	Endo	Opto	Endo	Opto	Endo	Opto	Endo	Opto	Endo	Opto	Endo	Opto
-0.883675	0.846284	-0.883675	0.818901	0.30495	0.749002	0.565715	0.846284	0.298887	0.802929	0.408391	0.516949	0.433294	0.374148	0.643827	-0.32453	0.179588	0	-0.853841	-0.682079	0.624603	-0.896226
0.624603	0.818901	-0.226872	-0.249555	0.0407225	0.284151	0.313855	0.965055	0.429935	0.182542	0.731612		0.2558	0.994804	-0.00545499	0.0219887	0.718019		-0.248654	0.691696	0.979428	-0.772431
-0.226872	-0.249555	-0.529013	0.527569	0.542898	0.653342	-0.621706	0.795455	0.773222	0.748815	0.1483		0.661357	0.69583	0.181975		0.224042		0.0450828	0.60228	0.960069	0.964646
0.979428	0.527569	0.948643	0.0925975	0.668082	0.884799	-0.115139	0.905899	-0.979523	-0.967925	0.727574		-0.24053	0.813056	0.00329787		0.46699		-0.932448	0.891121	0.748727	0.93173
0.565715	-0.896226	-0.255208	-0.908032	0.801016	0.12756	-0.245203	0.236863	0.151491	0.659573	0.589153		0.0665523	-0.537402	0.171094		-0.652216		-0.916665	0.615393	0.985054	0.767057
0.313855	-0.772431	-0.795599	0.553748	0.728212	0.519121	0.468138	0.401917	0.576134	-0.594856	0.495679		-0.0960838	0.663198	-0.245293		0.543964		-0.614355	-0.909754	-0.423541	0.991401
-0.621706	0.749002	0.205629	0.764582	0.823432	0.33184	0.837354	-0.335817	0.889532	0.899367	0.242461		0.17998	-0.109248	0.00634104		-0.0301233		-0.45794	-0.750049	0.86767	0.985439
-0.529013	0.374148	-0.69819	-0.799651	-0.597391	0.795744	-0.931669	0.879398	-0.936261	0.936188	0.706776		0.30976	-0.0786561	0.727455		0.221549		-0.883539	-0.481314	0.0431684	0.949377
0.30495	-0.682079	0.695215	-0.37952	0.111846	0.196722	0.162552	-0.373867	-0.982323	-0.923294	0.836673		0.500188	-0.817791	0.321914		-0.432379		-0.0328209	0.733174	-0.263125	0.885852
-0.115139	0.964646	0.697436	-0.706074	0.822808	-0.809455	-0.364396	-0.006508	0.129923	-0.0840925	0.43331		0.755894	-0.114757	0.696978		-0.501775		0.0903823	0.479449	-0.211199	0.888128
-0.853841	0.93173	0.292022	0.91006	0.75452	0.913388	0.120681	-0.238513	-0.495498	0.830153	0.763483		0.695176		-0.615202		0.0686342		0.0172772	0.711003	-0.84066	0.697192
0.948643	0.284151	-0.592488	0.923302	0.512537	0.916579	-0.761521	-0.899633	0.818263	-0.362877	0.571302		0.852741		-0.301734		0.212823		-0.298092	0.548024	0.650396	0.898482
0.179588	0.965055	-0.776422	0.711083	0.830847	0.903262	-0.20344	-0.187769	-0.0675044	0.877826	0.193615		0.617778		0.419487		0.454835		-0.662045	-0.189843	0.115213	0.973254
0.408391	0.767057	-0.709222	-0.974813	0.0149856	0.739277	0.16936	0.194266	-0.453531	0.620338	0.589318		0.778429		0.259672		-0.136544		0.341905	0.695036	0.925861	0.940123
-0.255208	0.991401	-0.982556	-0.407224	-0.472674	0.682347	-0.3683	-0.28725	0.944744	0.414763	0.113156		0.705566		-0.282093		0.2667		0.156624	0.735621	0.908225	0.984982
0.0407225	0.985439	0.398782		-0.66259	0.581705	-0.798547	0.438789	-0.81997	-0.833084	0.471895		0.275028		-0.290888		-0.0341955		-0.71174		0.572155	0.980987
0.643827	0.949377	-0.841218		-0.0633762	0.863526	0.883855	0.383836	-0.975436	0.922682	0.699721		0.664162		0.479411		0.406106		-0.518595		0.923867	0.973034
0.542898	0.885852	-0.965399		0.00412263	0.932731	0.561536	0.22133	0.971956	-0.581903	0.304401		0.897835		0.0919466		0.0495372		-0.789538		0.677508	0.631651
-0.795599	0.888128	-0.697862		0.23022	0.871893	0.258176	0.314733	-0.0280482	-0.52366	-0.0289255		-0.908469		-0.590522		0.441383		-0.212712		-0.612124	-0.103758
0.668082	0.697192	-0.645215		0.821735	0.78929	0.331445	0.364417	-0.421712	-0.435648	0.116828		0.786665		0.225749		-0.936705		-0.495279		0.473622	0.840667
0.731612	0.994804	-0.80524		0.803048	-0.657813	-0.823175	-0.0928109	-0.925977	0.28025	0.386828		0.918212		0.173024		-0.417456		0.344081		0.782823	0.837762
0.205629	0.898482	-0.959155		0.402927	0.832219	-0.780149	-0.0311578	0.443018	0.881909	-0.0885623		0.495356		-0.10418		0.321902		0.366415		0.649863	0.885343
0.1483	0.973254	-0.664638		0.531774	0.540956	-0.35576	0.386526	0.919771	0.251075	0.780782		0.747577		0.155052		0.268081		-0.701958		-0.75623	0.976286
0.727574	0.940123	0.945273		-0.0390635	-0.536633	0.662453	0.279925	0.0494223	0.16725	-0.0797807		-0.501554		-0.0442649		0.0930997		0.19906		0.805243	0.983176
0.801016	0.984982	-0.96575		0.616736	-0.854585	-0.892162	0.499877	-0.442802	-0.519138	-0.00602019		-0.0606877		0.298767		0.240199		0.0228379		0.322361	0.561124
0.728212	0.980987	-0.5495		0.136581	-0.856765	0.0851331	0.837034	0.992073	-0.822259	0.449525		0.790544		-0.00443828		0.0832977		-0.38572		0.869992	0.890236
-0.245203	0.69583	0.433276		0.460389	-0.789621	-0.0813741	0.3363	0.932355	0.84915	0.312562		0.785065		0.65204		-0.0545504		-0.866866		0.439355	0.949943
0.823432	0.973034	-0.914265		-0.0592176	-0.0161204	-0.163771	-0.546238	-0.806771		0.856105		0.28651		0.157809		-0.602379		0.0497148		-0.186933	0.903969
-0.597391	0.631651	0.511745		-0.0954881	-0.299748	-0.714461	0.63526	0.108075		0.146994		0.640168		0.356254		0.275568		-0.0953715		-0.70041	0.959746
0.111846	-0.103758	0.467023		0.811171	0.873354	-0.844061	-0.560132	-0.0116449		0.347406		0.00382303		-0.547152		-0.272055		-0.883267		0.950347	0.964002
0.468138	0.840667	-0.889042		0.253057	-0.560918	0.672986	0.668831	0.957619		0.0801374		-0.303629		0.646397		0.341443		-0.923878		0.77074	0.845185
-0.69819	0.837762	0.926651		-0.576022	-0.715153	0.957107	0.588221	-0.609159		-0.15332		-0.112992		-0.34461		0.262958		-0.918309		0.878728	0.283186
0.822808	0.885343	-0.731395		-0.399013	0.00688976	-0.041666	0.50511	0.888028		-0.277654		0.594528		0.355469		0.140426		-0.805154		0.0992774	0.0403003
0.837354	0.976286	0.228209		0.58195	0.193361	0.243652	-0.43714	0.878571		0.603661		0.695906		-0.165771		0.00300373		-0.919272		0.849839	-0.0198714
0.695215	0.983176	-0.982763		0.445974	-0.806397	0.814784		0.82066		-0.194375		0.530454		0.292275		0.196461		-0.76736		0.961638	-0.000505878
0.697436	0.561124	-0.984114		0.516412	-0.603032	-0.651848		-0.0340933		0.33263		0.847449		0.364717		0.241942		0.907769		0.265861	0.547329
0.298887	0.890236	-0.960875		-0.0130862	-0.888455	-0.768188		0.82985		0.278562		0.334519		0.47345		0.0329094		-0.868361		0.569499	0.775605
-0.931669	0.653342	-0.53932		0.188664	0.967519	-0.741193		0.720705		-0.0705226		-0.184954		-0.629533		-0.108059		0.555861		0.192425	0.870195
0.292022	0.949943	0.596246		0.605787		-0.253892		-0.941145		0.253091		0.950962		-0.242798		-0.566922		0.696647		0.834095	-0.879054
-0.592488	0.795455	0.86369		-0.111529		-0.620879		-0.905288		-0.184335		-0.074016		0.197033		-0.0312412		0.437185			0.966476
0.960069	0.0925975	0.850475		0.26123		0.806619		-0.617361		0.263274		-0.463277		0.475202		-0.305881					0.854116
-0.776422	0.903969	0.0872519		0.584233		0.391425		0.720016		0.331228		0.483788		0.129766		0.186694					-0.193875
0.429935	0.691696	-0.913257		0.146678		-0.273393		-0.605982		0.0567491		0.322973		0.0837419		0.747401					0.322011
0.589153	0.884799	0.784066		0.876755		-0.550968		0.860368		0.322295		0.392127		0.207533		0.480912					0.583785
0.495679	0.959746	-0.804219		0.605723		-0.784479		0.742552		0.527826		-0.0733577		-0.27472		0.541891					-0.218633
0.75452	0.802929	0.6183		0.709624		-0.67954		-0.918416		0.66418		-0.0183012		0.0520108		-0.222847					-0.725844
-0.709222	0.964002	-0.925305		0.398735		-0.890893		0.675586		0.160198		0.0376776		-0.711561		0.174237					-0.322098
-0.982556	0.845185	-0.252884		0.661686		-0.782118		0.87899		-0.469678		0.268633		0.648759		0.515053					-0.595787
-0.00545499	0.905899	0.935649		0.954342		-0.365167		0.135627		0.712807		-0.638966		-0.0245518		0.507322					0.176539
0.242461	0.60228	-0.948142		0.913385		-0.485477		-0.495542		0.109956		-0.0819137		0.325668		0.594743					0.922775
0.433294	0.12756	-0.834378		0.799298		0.345953		-0.97254		0.2312		-0.174406		-0.763075		0.604643					0.808885
0.398782	0.283186	-0.711968		-0.475165		0.39454		0.929278		-0.472464		0.662332		-0.128724		0.3583					0.905751
0.512537	0.0403003	-0.0505168		-0.00184608		0.581142		-0.85773		0.23518		0.154343		-0.142098		0.445778					-0.382122
0.773222	-0.0198714	-0.747181		0.942336		0.478941		-0.714052		-0.620011		-0.194439		0.185269		0.453717					-0.367047
0.830847	0.182542	0.511233		0.907109		-0.695173		0.787204		0.213808		-0.505726		0.442693		0.279671					0.481793
0.0149856	0.236863	-0.204527		-0.542966		-0.3227		-0.891196		-0.339877		0.276668		0.749671		0.167499					0.813827
-0.841218	0.401917	-0.304006		0.519752		0.869136		0.783965		0.12842		-0.524663		-0.255845		0.355013					0.109894
-0.472674	0.519121	0.347992		0.538641		-0.961799		-0.525461		-0.396293		-0.0458232		-0.521577		0.260088					0.477712
-0.965399	0.33184	0.784601		0.721747		0.675404		-0.892384		-0.00860316		0.943628		0.36227							-0.730539
-0.248654	-0.335817	-0.417857		-0.247373		-0.913032		-0.947669		0.0814602		0.59757		0.835405							0.312082
-0.66259	0.879398	-0.382514		-0.609236		0.703024		0.783367		0.246449		-0.19008		0.458438							0.975589
0.706776	-0.373867	-0.410981		0.40741		0.503671		-0.502065		-0.222059		0.544025									0.990062
-0.0633762	-0.908032	0.447024		0.832203		0.729574		-0.939937		0.721034		0.415442									0.247265
0.748727	0.748815	0.427433		-0.431508		-0.387411		0.991399		0.430723		0.00654801									0.874596
0.00412263	-0.967925	-0.777467		-0.357759		-0.4822		-0.643939		-0.605696		0.437552									0.93931
0.23022	-0.000505878	0.531111		0.0252782		-0.845212		-0.3763		0.334771		-0.573094									0.881155
0.718019	0.795744	-0.92091		-0.400993		-0.554379		-0.945086		0.479879		0.68569									0.95188
0.821735	0.891121	-0.0619207		0.231888		-0.832265		-0.952878		-0.0100376		-0.122286									0.741996
0.181975	0.547329	0.659279		0.353567		-0.523042		-0.059712		0.528233		0.252189									0.596606
-0.697862	0.553748	0.716384		-0.138044		-0.787382		-0.75541		0.109452		0.660709									0.942025
0.803048	0.764582	0.32856		0.150059		-0.151409		-0.767409		0.368316		-0.340848									0.816825
-0.979523	-0.006508	-0.0809939		0.431822		0.373357		-0.1356		0.275282		-0.482067									0.826531
0.402927	0.775605	0.772077		0.117981		-0.105253		0.567802		-0.115905		0.865268									0.872568
0.531774	0.196722	0.708343		-0.438227		0.834431		0.800357		-0.774813		0.363629									0.863545
0.162552	-0.809455	-0.0175817		0.795695		-0.91772		0.144369		-0.00874021		0.292176									-0.875227
0.151491	0.615393	0.670587		0.487072		-0.148393		-0.445656		-0.20949		0.538913									-0.861403
0.00329787	0.870195	0.0769277		0.362366		0.848237		0.800175		0.803677		0.00725769									-0.471295
0.836673	0.659573	0.07275		0.497455		-0.967415		0.940661		0.552945		0.131004									-0.923145
-0.0390635	-0.594856	0.0705909		0.426459		0.691745		-0.160547		0.674345		-0.102369									-0.854001
0.224042	-0.879054	0.291839		-0.153904		0.747704		-0.961502		0.535043		0.96756									0.233056
-0.645215	-0.238513	0.323471		0.509794		0.838524		0.497968		0.305015		0.254861									-0.672292
-0.80524	-0.899633	-0.77765		0.698808		0.0118515		-0.806097		0.884072		0.123707									-0.849391
0.43331	0.913388	0.733443		0.31648		0.820599		0.590334		0.74046		0.262159									0.699029
0.616736	-0.187769	0.702106		0.428667		0.777395		0.00904041		0.70602		0.0741578									0.884666
0.136581	0.194266	-0.636428		0.381197		-0.896933		0.860895		0.700054		0.225165									0.957027
-0.364396	-0.28725	0.171135		0.621613		0.765127		0.856757		0.540575		0.753421									0.81783
-0.959155	0.438789	0.547062		0.65513		-0.959098		-0.842457		0.380415		0.0702119									0.951983
0.120681	-0.799651	0.503872		0.642436		0.840346		-0.71024		0.765553		0.0949001									0.333129
0.576134	0.383836	0.436989		0.292687		0.904994		0.692836		0.833189		-0.108087									0.0886572
0.460389	-0.37952	-0.0256945		0.665004		0.419426		-0.972257		0.854636		0.0682458									0.806011
-0.761521	0.966476	-0.192321		0.795939		-0.862124		-0.96947		0.144764		-0.540079									0.882319
0.763483	0.916579	0.42812		0.76408		-0.420813		-0.941438		0.811847		0.575393									0.89534
0.889532	0.903262	-0.828544		-0.939289		-0.959226		-0.958951		0.0610708		0.648112									0.0550236
-0.936261	0.739277	-0.104527		0.494383		-0.673495		0.30207		0.556472		0.0138057									0.444931
-0.0592176	0.854116	-0.360216		0.358874		0.386158		-0.898473		0.0837133		0.0465221									0.464242
-0.982323	-0.193875	-0.193258		0.70787		-0.343851		-0.824295		0.626178		0.490012									-0.382133
-0.20344	0.322011	-0.783386		0.796723		-0.921182		0.951141		-0.326047		0.909314									-0.690392
0.985054	0.583785	0.182499		0.256226		0.573586		0.689384		0.116934		0.727346									0.677768
0.16936	-0.218633	-0.256335		-0.696101		-0.598576		-0.938174		0.0721355		0.989619									0.95341
-0.0954881	-0.725844	-0.653654		0.108646		0.672304		-0.931034		0.334992											0.43494
-0.3683	-0.322098	-0.249047		-0.15835		-0.815221		-0.723974		-0.106439											-0.669939
0.46699	-0.595787	0.409094		0.643294		-0.16621		0.640059		0.547203											-0.973182
0.0450828	0.899367	0.443687		-0.323665		-0.342221		0.808333		0.579563											-0.608493
0.811171	0.22133	0.843685		0.402528		-0.746166		-0.691835		0.288387											-0.433288
-0.652216	0.314733	0.0292325		0.387638		0.275386		-0.74973		0.544892											0.569564
0.253057	0.682347	-0.935886		0.152224		-0.22069		-0.0544884		0.722929											-0.452374
0.171094	0.176539	-0.914104		-0.0258226		-0.187376		-0.90684		0.0434724											0.827442
-0.576022	0.364417	-0.411197		0.319438		-0.516823		-0.616713		0.666873											0.620774
-0.664638	-0.909754	0.691035		0.563784		0.113556		0.221915		0.754751											-0.760535
-0.798547	0.936188	0.701278		0.0765676		0.725297		0.68641		-0.359233											-0.945219
0.945273	-0.923294	-0.956228		0.000838772		0.608415		-0.870544		0.0281499											-0.722728
0.129923	0.922775	0.564956		0.542343		-0.0442872		-0.762061		0.70484											0.728317
-0.399013	0.808885	-0.656987		0.242793		0.680769		-0.871763		0.476554											0.740411
-0.495498	-0.0928109	-0.979149		-0.109042		-0.428295		0.521485		0.189048											0.924025
-0.96575	0.905751	-0.501753		0.547146		-0.375897		0.964006		0.000267842											0.966076
0.818263	-0.382122	-0.97847		-0.39092		-0.141884		-0.923138		-0.558467											0.879396
-0.5495	-0.0311578	0.818044		-0.075367		0.661604		-0.197974		-0.176934											0.982094
0.571302	-0.367047	0.494859		0.254192		0.585224		-0.456481		0.486713											0.965295
0.433276	-0.750049	0.0710786		0.590764		0.81748		-0.912731		0.586009											0.278441
-0.914265	0.481793	-0.554269		0.110181		-0.497384		0.214113		0.488963											0.893632
0.511745	0.813827	-0.937355		-0.405381		0.354579		-0.71512		0.451495											0.919568
0.467023	0.109894	-0.686018		-0.0485195		-0.653175		-0.305081		-0.20682											0.971954
-0.889042	0.477712	-0.867061		0.831461		-0.519334		-0.643825		0.0716971											-0.433077
-0.0675044	0.386526	-0.494445		-0.282562		0.711885		-0.608405		0.819249											0.94788
0.883855	-0.730539	-0.735843		0.352486		0.756242		0.888666		0.396793											0.429159
0.193615	-0.706074	-0.479371		0.0637421		0.663543		-0.946291		0.75315											0.793339
-0.453531	-0.0840925	0.320534		-0.197691		-0.759216		0.765691		0.57545											0.937726
0.561536	0.279925	-0.919258		-0.340429		0.790671		-0.925122		0.596403											0.971875
0.258176	0.581705	-0.556052		0.798958		0.651761		0.708857		0.396689											0.817596
0.58195	-0.32453	0.442173		0.140812		-0.183515		-0.862116		-0.308816											0.962073
0.445974	-0.481314	-0.97371		0.308604		0.600286		-0.2721		-0.0124399											0.716857
0.926651	0.0219887	0.454816		-0.2113		0.840267		0.749143		0.590333											0.242598
-0.731395	0.312082	0.532567		0.22131		0.495809		0.238149		0.0547533											0.930684
0.516412	0.975589	-0.269247		0.814531		0.833455		0.961676		-0.0834187											0.896352
-0.0130862	0.733174	-0.980821		0.277855		0.240787		-0.0643417		-0.330637											0.887711
0.228209	0.990062	-0.242977		0.243871		-0.444891		0.371825		0.34954											0.967084
0.2558	0.479449	-0.845217		0.293171		0.803734		-0.90647		0.0857878											-0.607938
0.188664	0.247265	0.741272		0.194748		0.757199		-0.942157		0.315759											-0.241679
0.605787	0.813056	-0.904432		-0.528004		-0.428079		-0.901667		0.344796											0.0619189
-0.982763	0.874596	0.57739		-0.397079		0.673928		-0.463742		0.827962											0.889997
-0.984114	0.516949	-0.686479		-0.115416		0.807656		-0.929768		0.53281											0.843308
-0.245293	0.93931	-0.955592		0.541327		-0.517764		0.0280073		-0.346057											0.654807
0.661357	0.881155	0.947633		-0.294823		-0.930667		-0.937535		0.643352											-0.189582
-0.960875	-0.537402	-0.706225		0.232407		-0.0756318		-0.494238		0.775319											0.934707
0.944744	0.95188	0.508644		-0.13331		-0.708973		-0.951962		0.686891											0.848944
-0.53932	0.741996	0.240442		-0.213053		0.861976		-0.973989		-0.361058											0.263008
-0.111529	0.863526	-0.00741476		0.440155		-0.0102373		-0.894436		-0.0326342											0.767251
0.26123	0.596606	-0.756075		-0.0712576		-0.172246		-0.00940094		0.093744											-0.612713
0.331445	0.942025	0.236135		-0.539362		0.250312		-0.837083		0.305415											-0.858588
0.596246	0.816825	0.61133		0.325104		-0.824702		0.273796		0.0904752											0.73748
0.86369	0.663198	-0.565888		-0.460881		-0.775377		-0.827714		0.59467											-0.803581
-0.932448	0.932731	-0.885046		0.122286		-0.201709		-0.853471		-0.0594388											0.793516
0.584233	0.826531	-0.907141		-0.127		-0.610991		0.799596		0.348588											0.338391
-0.81997	0.871893	-0.750255		-0.499622		-0.875137		0.362639		0.218188											0.642199
-0.975436	0.872568	-0.798522		0.281204		-0.922966		-0.149512		0.561569											-0.761268
0.146678	0.863545	-0.838611		0.674225		-0.878874		0.910554		0.346866											0.19689
0.589318	-0.875227	0.164971		0.326932		-0.894288		-0.932306		0.0101743											-0.0584942
-0.823175	-0.861403	-0.0762661		-0.388372		-0.063553		-0.791768		0.287408											0.768964
0.876755	-0.471295	-0.924591		-0.148897		-0.400857		0.855372		0.913948											-0.715514
0.971956	0.499877	-0.158426		0.128958		-0.854863		0.46679		0.811929											-0.597576
0.605723	0.78929	0.0883526		-0.382243		0.491249		-0.748789		0.586106											-0.58589
-0.423541	0.830153	-0.0381113		0.142727		0.227042		-0.880223		0.600698											0.0671119
-0.0280482	-0.923145	-0.986814		-0.152531		0.734911		0.884352		0.725267											-0.279039
-0.421712	-0.854001	0.473947		0.307643		-0.95725		-0.709902		0.312147											-0.471937
-0.916665	0.233056	-0.830878		-0.616581		-0.567414		0.923971		0.199342											0.255385
0.709624	-0.672292	-0.495474		0.538467		-0.368328		0.44195													0.603585
-0.780149	-0.849391	-0.245054		0.113722		-0.0303011		0.926728													-0.925821
-0.925977	-0.657813	0.927762		-0.0246276		0.79103		-0.843294													0.389058
0.443018	-0.362877	-0.845742		-0.144809		0.539645															-0.246416
0.543964	0.699029	-0.602651		-0.411794		0.536608															-0.809352
0.919771	0.884666	-0.68069		0.2181		-0.844872															0.971783
0.850475	0.877826	-0.911965		-0.541401		-0.962097															0.990473
0.0494223	0.957027	-0.945014		-0.155837		-0.903762															0.833811
-0.442802	0.832219	-0.0324379		0.78529		-0.505724															0.927193
0.992073	0.81783	-0.895381		-0.388417		-0.62975															0.927406
-0.0301233	0.951983	0.0699574		0.748568		-0.522699															0.983519
-0.35576	0.333129	0.0930575		0.434441		-0.811068															0.957845
0.932355	0.0886572	-0.961359		0.627585		0.028165															0.903771
-0.806771	0.540956	0.54062		0.288112		-0.0501979															0.95935
0.662453	0.620338	-0.109626		0.0706458		-0.823484															0.866004
0.398735	0.806011	-0.865319		0.178847		0.740607															0.780076
0.661686	0.882319	0.0363982		0.575957		-0.740602															0.968202
0.0872519	0.837034	-0.114198		-0.00300942		0.856245															0.00310437
-0.892162	0.89534	-0.925656		0.602884		0.786122															-0.479815
0.0851331	0.0550236	0.517175		-0.157924		0.89632															-0.113985
-0.0813741	0.444931	0.558189		0.157839		0.732183															0.309141
-0.163771	0.464242	-0.876149		0.368645		-0.791043															0.977634
0.108075	-0.382133	-0.147649		-0.557211		-0.939826															0.290707
0.86767	-0.690392	-0.838996		-0.0200256		0.936994															0.920713
-0.0116449	0.677768	-0.651178		-0.391791		-0.80928															0.937547
0.957619	0.95341	0.149088		-0.069437		0.0520506															-0.281631
-0.609159	0.43494	-0.964432		0.161229		0.909353															-0.598085
0.888028	-0.669939	-0.518138		0.175696		0.479716															0.563191
0.878571	-0.973182	-0.155799		0.542325		-0.0982867															-0.907464
-0.614355	-0.608493	-0.93296		0.564618		-0.0750161															0.0770575
0.0431684	-0.433288	-0.150238		0.125917		0.121028															-0.264425
0.113156	-0.536633	-0.797946		0.138241		-0.706688															-0.749066
-0.714461	0.569564	0.399426		0.192781		-0.824891															0.97004
0.82066	-0.452374	-0.671165		0.367774		0.628914															0.258219
-0.0340933	0.827442	-0.217331		-0.378375		-0.405552															-0.0808804
0.82985	0.620774	-0.74623		0.921609		-0.718999															0.629658
0.720705	-0.760535	0.298272		0.929717		-0.530928															0.995077
-0.941145	-0.945219	-0.0604201		-0.106444		-0.886642															-0.901391
-0.45794	-0.722728	0.609149		0.0627604		0.154321															0.97138
-0.263125	0.728317	-0.790048		0.739819		-0.479545															0.762821
-0.913257	0.740411	-0.399438		0.516899		0.145465															0.774813
-0.844061	-0.854585	-0.933087		0.305384		-0.113225															-0.400881
0.954342	0.414763	-0.965136		0.482237		0.29715															-0.3211
0.672986	0.924025	-0.995856		0.0965365		-0.20636															-0.637376
0.784066	0.966076	0.553667		0.590895		-0.976981															0.556512
0.913385	0.879396	-0.990105		0.893656		0.367962															-0.715162
-0.804219	0.982094	0.20762		-0.0337298		0.660502															-0.474181
0.957107	0.965295	-0.979786		0.349184		0.000876425															-0.0327167
-0.24053	0.278441	-0.923014		0.252944		-0.0245183															0.869678
0.799298	0.893632	-0.600897		0.337045		-0.00928309															-0.781375
-0.905288	0.919568	0.354305		0.0178714		-0.911287															0.294156
-0.041666	0.971954	-0.618032		0.374302		-0.948893															-0.712752
-0.475165	-0.433077	-0.79578		-0.283598		0.499371															-0.851432
-0.211199	0.94788	0.990019		-0.258552		-0.738325															0.754901
-0.84066	0.429159	0.800669		-0.572372		-0.561708															-0.745345
0.6183	0.793339	-0.657104		0.830529		-0.936202															-0.544063
-0.925305	0.937726	-0.879349		0.906273		0.905604															-0.915224
-0.252884	0.971875	0.955357		0.838071		-0.778839															-0.964667
0.243652	0.817596	-0.904131		0.48819		0.620332															-0.0785768
0.00634104	0.962073	-0.964665		0.653674		-0.0156478															0.976916
-0.617361	0.716857	-0.889873		0.495951		0.169756															-0.795109
0.720016	0.242598	-0.874917		0.665608		-0.153369															0.7624
-0.00184608	0.930684	-0.986435		0.81523		0.843997															-0.768639
0.935649	0.896352	0.578533		0.607239		-0.227238															0.736322
-0.948142	0.887711	-0.951768		0.561152		-0.839471															0.514992
-0.883539	0.967084	-0.929333		0.604376		-0.440198															0.947799
0.650396	-0.607938	-0.969236		0.0340779		-0.150535															0.596266
0.115213	0.3363	-0.955384		-0.418088		-0.597773															-0.553966
0.942336	-0.241679	-0.602279		-0.280858		0.0296876															0.95125
0.814784	0.0619189	-0.223118		0.499294		0.90878															0.838029
0.221549	0.889997	-0.851538		-0.0573404		-0.638277															-0.529753
-0.605982	-0.833084	-0.948334		0.686321		-0.795786															-0.877731
0.860368	0.922682	-0.776919		0.291649		-0.338845															-0.937002
0.907109	0.843308	-0.967081		0.11183		-0.00595647															0.958642
-0.432379	0.654807	-0.974244		0.28964		0.672201															0.777175
-0.501775	-0.189582	-0.928457		0.592658		0.895399															0.908845
0.742552	0.934707	-0.936726		0.810846		-0.3791															0.875508
-0.542966	-0.581903	0.0857981		0.226156		0.244291
-0.834378	-0.52366	-0.939499		0.57089		0.340494
-0.651848	0.848944	-0.518236		-0.277211		-0.771709
-0.768188	0.263008	0.271425		0.0638926		0.437757
0.519752	0.767251	-0.889513		0.650246		-0.229024
-0.711968	-0.612713	-0.927407		0.681481		0.304113
-0.918416	-0.858588	-0.505117		-0.159429		-0.919651
-0.741193	0.73748	-0.961031		0.316052		-0.81337
0.0665523	-0.803581	-0.987524		-0.18664		-0.615512
0.925861	0.793516	-0.694937		0.462392		-0.859224
-0.0505168	0.338391	-0.895412		0.686277		0.485671
0.471895	0.642199	0.0458607		0.64871		-0.00357797
-0.747181	-0.761268	-0.276146		0.0595567		0.848146
0.908225	0.19689	-0.622272		0.845791		0.57282
-0.253892	-0.109248	0.531619		0.660365		0.509146
0.675586	-0.0584942	-0.0986175		-0.00173497		-0.622794
-0.0960838	-0.435648	-0.802031		0.623015		0.883626
-0.620879	0.768964	-0.95711		0.38592		-0.222348
0.87899	-0.715514	-0.827446		0.624252		0.934008
0.538641	-0.597576	-0.974687		0.545657		-0.559801
0.135627	-0.58589	-0.0402937		0.550292		-0.821514
0.806619	0.0671119	-0.893362		-0.150912		0.0385641
0.391425	-0.546238	-0.965101		0.728271		0.926002
0.721747	-0.279039	-0.981206		0.311311		-0.561441
-0.495542	-0.471937	-0.946843		0.187322		-0.0632448
-0.273393	0.255385	-0.582659		0.551548		-0.352343
0.511233	0.603585	-0.979877		0.446731		-0.145455
-0.550968	-0.925821	-0.11634		-0.449916		0.482081
0.727455	0.389058	-0.962554		0.312549		-0.458821
-0.204527	-0.246416	-0.971527		0.790255		-0.577818
0.699721	-0.809352	-0.971598		-0.23431		-0.221692
-0.304006	0.971783	-0.972796		0.502619		0.928223
0.347992	0.990473	-0.949816		0.919253		0.381382
-0.784479	0.833811	-0.886837		0.323597		-0.323102
0.17998	0.91006	-0.56506		0.477786		-0.31586
0.784601	0.927193	-0.577727		0.666551		-0.187282
-0.417857	0.927406	-0.952334		0.240562		0.311725
-0.382514	0.983519	-0.849082		0.6188		-0.940049
-0.410981	0.957845	-0.879506		-0.618368		-0.529082
0.447024	0.903771	-0.687598		0.382266		0.829657
0.30976	0.95935	-0.976301		0.720599		0.950994
-0.247373	0.866004	-0.912157		-0.0427103		-0.694674
0.427433	0.780076	-0.974246		0.0894547		-0.905425
-0.777467	0.968202	0.774107		0.832753		-0.0227995
0.531111	0.00310437	-0.394142		0.854512		-0.712674
0.500188	-0.856765	-0.836286		0.156436		0.753096
0.755894	-0.479815	-0.945738		0.826978		-0.513002
-0.92091	0.63526	-0.971952		0.127205		0.747209
-0.97254	-0.113985	-0.994676		0.267813		0.471239
0.929278	0.309141	-0.843071		-0.00122985		0.125329
-0.67954	0.28025	-0.790826		0.0670408		0.1413
-0.0619207	-0.789621	-0.988845				0.721407
-0.609236	0.711003	-0.34389				-0.372971
0.659279	0.977634	-0.752981				0.537553
-0.890893	0.881909	-0.948079				0.455484
0.716384	0.290707	-0.91083				-0.456075
0.695176	-0.0161204	-0.767265				-0.607145
0.32856	0.920713	-0.406071				0.303506
-0.0809939	0.937547	-0.732995				0.0815488
0.772077	0.251075	0.161453				0.956683
0.852741	0.923302	-0.979				0.637575
-0.782118	-0.560132	0.512103				0.229144
0.708343	0.711083	-0.979881				-0.283693
-0.365167	-0.0786561	-0.952485				-0.673877
-0.0175817	0.668831	-0.308209				-0.0355868
0.670587	0.588221	-0.428395				-0.978866
0.304401	-0.281631	-0.0604882				0.669525
-0.0289255	-0.598085	0.0451532				-0.146068
0.0769277	-0.299748	-0.65641				-0.656877
0.07275	0.50511	-0.298507				0.74909
0.617778	0.563191	-0.985989				0.655633
0.778429	-0.907464	-0.562328				-0.128476
-0.485477	0.548024	-0.432894				0.319194
0.345953	0.0770575	-0.98712				0.439849
0.0705909	-0.264425	-0.982201				-0.955708
0.291839	-0.749066	-0.947769				-0.0579528
0.705566	0.97004	-0.247712				-0.053886
0.323471	0.258219	-0.919336				0.800996
-0.77765	-0.0808804	0.739039				-0.473658
0.40741	0.873354	0.148372				0.689567
0.733443	-0.817791	-0.828755				-0.508534
0.321914	-0.560918	-0.571473				-0.448458
0.702106	-0.974813	0.805921				0.324628
-0.636428	-0.715153	0.677107				-0.0859
0.39454	0.00688976	-0.57085				-0.542625
0.581142	0.193361	-0.950573				0.145382
0.478941	-0.806397	0.88512				-0.92001
-0.695173	0.629658	-0.463283				0.578436
0.171135	0.995077	-0.952307				-0.318006
0.547062	-0.901391	0.765403				-0.428111
0.116828	0.97138	0.50339				0.12072
0.503872	0.762821	-0.876973				0.208509
0.436989	0.16725	0.571585				-0.881809
-0.0328209	0.774813	0.758084				-0.82431
-0.0256945	-0.407224	-0.271512				-0.0892504
0.275028	-0.400881	0.352458
-0.192321	-0.3211	-0.216665
0.42812	-0.637376	-0.296046
-0.828544	0.556512	-0.966144
0.664162	-0.715162	-0.965561
-0.85773	-0.189843	0.608
-0.104527	-0.474181	0.651661
-0.360216	-0.0327167	-0.97883
-0.193258	0.869678	0.808477
-0.3227	0.695036	0.427277
0.832203	-0.43714	0.755351
-0.783386	-0.781375	-0.630528
0.182499	-0.603032	-0.855124
-0.256335	-0.114757	0.964355
0.869136	0.294156	-0.654482
-0.653654	-0.888455	-0.0694084
0.696978	-0.712752	-0.933988
-0.961799	-0.851432	0.221841
0.675404	0.735621	0.245747
-0.913032	0.754901	-0.504894
0.703024	-0.745345	-0.1389
-0.431508	-0.544063	-0.497988
0.386828	-0.915224	-0.446593
-0.249047	-0.964667	-0.839363
0.409094	-0.0785768	-0.0779672
0.443687	0.976916	0.0917734
0.843685	-0.795109	-0.464581
0.503671	0.7624	-0.0325854
0.897835	-0.768639	-0.505773
0.0292325	0.736322	0.0117334
0.729574	-0.519138	-0.285525
-0.387411	-0.822259	-0.977746
-0.714052	0.514992	-0.935989
-0.935886	0.947799	-0.943714
0.787204	0.596266	-0.928775
-0.4822	-0.553966	-0.959762
-0.914104	0.967519	-0.268986
-0.411197	0.95125	-0.6609
-0.845212	0.84915	-0.543095
0.691035	0.838029	-0.510286
0.701278	-0.529753	-0.249801
-0.956228	-0.877731	-0.972614
-0.554379	-0.937002	0.149681
0.564956	0.958642	0.507522
-0.656987	0.777175	-0.323977
-0.832265	0.908845	-0.158029
-0.891196	0.875508	0.604782
-0.979149		-0.643699
0.783965		-0.85095
-0.501753		0.447146
-0.523042		-0.477657
-0.97847		-0.870094
-0.525461		-0.774685
0.818044		-0.227002
0.494859		-0.438557
-0.892384		0.590867
-0.947669		-0.804778
-0.787382		0.280817
0.0710786		-0.909386
-0.151409		0.122053
0.783367		0.531936
0.373357		-0.751999
-0.554269		-0.901322
-0.937355		-0.89289
-0.0885623		-0.558491
-0.105253		-0.828945
0.834431		-0.762711
-0.502065		-0.609774
-0.686018		0.564595
-0.939937		0.0909632
-0.867061		-0.370189
-0.494445		-0.84936
-0.735843		0.57641
0.991399		0.274087
-0.479371		-0.427065
0.320534		0.172514
-0.908469		-0.949009
-0.91772		-0.272357
-0.919258		-0.732066
0.786665		-0.0994726
-0.643939		-0.706883
0.918212		0.667303
-0.148393		-0.669834
-0.556052		-0.693411
0.848237		-0.886947
-0.3763		0.383517
-0.945086		-0.956113
0.495356		-0.356664
0.442173		-0.801135
-0.97371		-0.951271
-0.967415		0.168692
0.691745		-0.852247
-0.952878		-0.927586
0.454816		-0.291526
0.532567		-0.727398
0.747704		-0.919681
-0.269247		-0.620858
0.838524		-0.868564
0.747577		-0.517742
0.780782		-0.983191
0.0118515		0.330023
-0.980821		-0.985062
-0.242977		-0.97116
0.820599		-0.987806
-0.845217		-0.976236
-0.059712		-0.439911
0.741272		0.146785
0.777395		-0.982259
0.0686342		0.823933
-0.904432		-0.0414469
-0.896933		0.651041
0.57739		-0.0405037
-0.686479		-0.251472
-0.955592		-0.907836
0.765127		-0.854252
-0.959098		-0.900745
0.947633		0.0297789
0.840346		0.942212
0.904994		0.0483639
-0.706225		0.664078
0.508644		-0.675035
-0.357759		-0.893462
0.240442		-0.88631
-0.00741476		-0.781987
-0.756075		-0.973676
0.419426		-0.754066
-0.0797807		-0.893826
0.236135		0.501921
0.61133		-0.950379
-0.862124		-0.868775
-0.565888		-0.817413
-0.420813		0.267982
-0.885046		0.888665
-0.907141		-0.0370815
-0.750255		-0.986328
-0.798522		0.425084
-0.838611		-0.457547
-0.501554		-0.921822
0.164971		-0.757289
-0.75541		-0.780101
-0.0762661		-0.974055
-0.924591		0.56537
-0.158426		0.53182
-0.959226		-0.98256
-0.673495		-0.715505
0.0883526		-0.697414
-0.0381113		0.147118
-0.0606877		-0.930309
0.0903823		-0.877553
0.790544		-0.25293
-0.00602019		0.458204
0.0252782		0.741431
-0.400993		0.81324
0.386158		-0.574935
0.449525		-0.910961
-0.986814		-0.913943
0.473947		-0.870808
-0.343851		-0.669093
0.312562		-0.922228
-0.921182		-0.62171
-0.830878		-0.86064
-0.495474		0.592985
0.573586		-0.178239
-0.245054		-0.482969
0.927762		-0.89449
-0.845742		-0.966192
-0.602651		-0.781465
-0.68069		-0.991925
-0.767409		-0.644725
-0.1356		-0.702454
-0.911965		-0.612622
-0.945014		-0.9878
0.567802		0.382349
0.800357		-0.856783
-0.598576		-0.733888
-0.0324379		-0.600898
-0.895381		-0.831564
0.672304		-0.849647
0.0699574		-0.662169
0.144369		-0.888769
-0.445656		-0.108168
0.0930575		-0.766234
-0.961359		-0.32299
0.54062		-0.963203
-0.815221		-0.831989
-0.16621		-0.626261
-0.342221		0.97623
-0.746166		-0.328741
0.275386		-0.242189
-0.22069		-0.387843
0.800175		0.7368
0.940661		-0.365707
-0.109626		0.839388
0.785065		0.43512
0.856105		0.885729
-0.187376		0.632904
-0.865319		0.824767
0.146994		0.190066
-0.516823		0.437056
0.0363982		0.461736
0.113556		-0.630191
-0.114198		-0.182871
0.725297		0.369078
0.608415		-0.190103
-0.0442872		-0.561713
-0.925656		-0.0490487
0.517175		0.688283
0.680769		0.855154
-0.428295		0.769496
0.558189		-0.278642
-0.375897		0.594079
-0.141884		-0.734166
0.661604		-0.514253
-0.160547		0.207801
0.347406		0.521737
-0.876149		-0.338748
0.0801374		0.937788
0.585224		0.916937
0.81748		0.934598
-0.147649		-0.913087
-0.838996		0.185029
-0.15332		-0.242454
-0.277654		0.411182
-0.651178		-0.895114
0.149088		0.471932
-0.497384		-0.761751
0.354579		-0.361593
-0.964432		0.532628
-0.518138		0.177403
-0.155799		-0.099381
-0.653175		-0.872415
-0.93296		-0.449276
-0.150238		-0.364034
-0.961502		-0.967667
-0.519334		-0.902137
0.711885		0.772569
0.497968		-0.0378834
-0.797946		-0.418199
0.756242		0.517901
0.399426		-0.841286
-0.671165		-0.381055
-0.217331		-0.871712
0.663543		-0.97451
-0.74623		-0.401166
-0.759216		0.73108
0.603661		-0.569267
0.298272		0.0499792
0.790671		-0.787941
-0.194375		0.525697
-0.0604201		0.793738
0.609149		0.175905
0.28651		-0.915086
0.651761
0.33263
-0.183515
-0.806097
0.590334
-0.790048
0.00904041
0.231888
0.600286
0.278562
0.840267
0.495809
-0.0705226
0.833455
-0.399438
-0.933087
0.253091
0.240787
-0.444891
0.803734
-0.184335
0.860895
0.757199
0.856757
-0.965136
-0.428079
0.673928
0.807656
-0.995856
0.553667
-0.990105
-0.842457
0.263274
0.20762
-0.979786
-0.923014
-0.600897
0.353567
-0.517764
0.354305
-0.138044
0.150059
-0.618032
-0.930667
-0.79578
-0.71024
-0.0756318
0.331228
0.990019
0.800669
-0.657104
-0.708973
0.692836
-0.879349
0.431822
0.955357
-0.904131
-0.964665
-0.889873
0.861976
-0.0102373
-0.874917
-0.986435
0.0567491
0.322295
0.117981
0.578533
-0.951768
0.640168
-0.972257
-0.929333
0.527826
0.66418
0.160198
-0.172246
-0.615202
0.250312
-0.824702
0.212823
-0.438227
0.00382303
-0.303629
-0.969236
-0.955384
0.795695
-0.775377
0.487072
-0.602279
0.572155
-0.223118
0.454835
0.362366
-0.851538
-0.948334
-0.136544
-0.776919
-0.967081
-0.974244
-0.928457
-0.936726
-0.96947
0.0857981
-0.939499
0.497455
-0.301734
0.2667
-0.518236
0.419487
-0.201709
0.259672
-0.610991
-0.0341955
0.426459
0.271425
0.406106
-0.282093
-0.889513
0.0172772
-0.875137
-0.153904
0.509794
-0.298092
-0.922966
-0.878874
0.698808
-0.894288
-0.927407
-0.505117
-0.961031
-0.987524
-0.694937
-0.662045
0.341905
-0.895412
0.0458607
0.31648
0.156624
-0.276146
-0.622272
0.531619
-0.0986175
0.428667
0.381197
-0.802031
-0.95711
0.0495372
-0.290888
-0.112992
-0.71174
-0.063553
-0.827446
0.923867
0.677508
-0.974687
0.594528
-0.0402937
0.621613
0.65513
-0.400857
-0.893362
0.642436
0.292687
-0.965101
-0.981206
-0.469678
0.712807
-0.946843
0.695906
-0.854863
0.441383
0.491249
-0.518595
-0.612124
0.479411
0.227042
-0.582659
-0.979877
0.530454
-0.936705
-0.11634
-0.941438
0.665004
-0.962554
-0.971527
0.473622
-0.971598
-0.972796
-0.949816
0.782823
0.109956
0.2312
0.734911
0.795939
0.76408
0.847449
-0.886837
0.649863
-0.75623
-0.56506
-0.939289
-0.472464
-0.577727
-0.952334
0.805243
-0.95725
0.0919466
-0.567414
-0.849082
0.23518
-0.958951
-0.879506
-0.620011
-0.687598
0.494383
0.334519
-0.976301
0.30207
-0.898473
-0.824295
-0.912157
-0.974246
0.774107
-0.368328
0.951141
-0.590522
-0.184954
0.213808
-0.339877
-0.394142
-0.836286
-0.945738
0.950962
-0.971952
-0.074016
0.12842
-0.463277
-0.994676
0.358874
-0.0303011
0.70787
0.225749
-0.396293
-0.843071
0.79103
-0.790826
-0.417456
-0.988845
-0.34389
0.483788
0.321902
0.539645
-0.00860316
-0.752981
0.173024
0.536608
0.0814602
-0.948079
0.796723
0.246449
-0.10418
-0.91083
-0.767265
0.268081
0.155052
0.322361
-0.844872
0.322973
0.256226
0.392127
0.0930997
-0.696101
-0.406071
-0.222059
-0.732995
-0.0442649
0.240199
0.161453
0.721034
-0.962097
-0.0733577
0.298767
0.430723
-0.0183012
0.0376776
-0.605696
-0.00443828
0.869992
0.108646
-0.15835
0.0832977
0.439355
-0.0545504
-0.903762
0.689384
0.65204
0.643294
-0.505724
-0.979
0.512103
0.268633
-0.979881
-0.62975
0.157809
0.356254
-0.522699
0.334771
-0.638966
-0.952485
-0.308209
0.479879
-0.811068
-0.547152
-0.186933
-0.323665
-0.0100376
-0.602379
0.402528
0.387638
0.528233
-0.938174
0.646397
-0.34461
0.355469
-0.165771
0.292275
0.152224
0.028165
0.109452
-0.0258226
0.319438
0.563784
-0.0819137
0.0765676
-0.428395
-0.0501979
-0.0604882
-0.931034
0.0451532
-0.174406
0.368316
-0.823484
0.275568
0.662332
0.000838772
-0.272055
0.154343
0.341443
-0.65641
0.275282
-0.298507
0.262958
-0.985989
-0.562328
-0.432894
-0.98712
-0.194439
-0.982201
-0.947769
-0.247712
-0.505726
-0.115905
-0.774813
-0.919336
0.739039
-0.70041
0.740607
0.950347
0.542343
-0.00874021
0.77074
0.148372
-0.828755
-0.571473
0.276668
0.242793
-0.20949
0.805921
0.677107
-0.57085
-0.950573
0.88512
-0.463283
-0.952307
-0.723974
-0.109042
-0.789538
0.765403
-0.740602
0.50339
-0.876973
0.571585
-0.212712
0.758084
-0.524663
-0.271512
0.640059
0.808333
0.364717
0.352458
0.856245
-0.216665
0.786122
0.89632
-0.495279
-0.0458232
-0.296046
-0.966144
0.732183
-0.965561
0.608
-0.791043
0.651661
-0.97883
0.808477
0.427277
0.547146
0.755351
-0.630528
0.803677
0.344081
0.943628
-0.855124
0.964355
-0.654482
-0.939826
-0.0694084
-0.933988
0.59757
0.221841
-0.19008
0.245747
-0.504894
-0.1389
0.936994
0.366415
0.47345
-0.701958
0.544025
0.19906
0.415442
-0.691835
0.552945
0.00654801
0.437552
-0.80928
0.0520506
0.909353
-0.74973
-0.497988
-0.446593
-0.39092
-0.075367
0.140426
-0.629533
0.479716
0.254192
0.590764
0.110181
-0.839363
-0.0779672
-0.405381
0.674345
-0.0485195
-0.0982867
0.831461
-0.282562
0.352486
0.0917734
0.0637421
-0.197691
-0.242798
-0.340429
0.798958
-0.0750161
0.140812
0.308604
0.121028
-0.464581
-0.0325854
-0.2113
-0.706688
-0.0544884
-0.505773
0.22131
0.814531
0.0117334
-0.824891
0.277855
0.243871
0.00300373
0.293171
0.194748
-0.528004
-0.397079
-0.115416
0.628914
0.535043
0.541327
-0.285525
-0.977746
-0.573094
0.196461
-0.294823
0.232407
-0.13331
0.305015
-0.935989
-0.943714
-0.213053
0.440155
-0.405552
-0.928775
-0.959762
-0.268986
-0.0712576
0.884072
0.68569
0.74046
-0.539362
0.325104
-0.6609
-0.718999
-0.460881
0.122286
-0.127
-0.530928
-0.499622
0.281204
0.674225
-0.886642
0.326932
-0.543095
-0.388372
-0.148897
0.128958
-0.382243
0.142727
-0.510286
0.154321
-0.122286
-0.152531
0.307643
0.70602
-0.616581
-0.249801
0.700054
-0.972614
0.538467
0.113722
-0.0246276
0.149681
-0.144809
-0.411794
0.2181
0.507522
-0.323977
-0.541401
-0.158029
-0.479545
0.540575
0.604782
-0.643699
-0.85095
-0.90684
0.447146
0.380415
-0.477657
-0.155837
0.252189
0.78529
0.660709
0.765553
-0.388417
0.833189
-0.340848
0.748568
-0.870094
-0.616713
0.434441
0.145465
-0.774685
-0.227002
0.627585
0.221915
-0.113225
0.29715
0.68641
-0.438557
0.590867
0.288112
0.0706458
0.178847
-0.804778
-0.20636
0.575957
-0.976981
-0.482067
-0.00300942
0.280817
0.367962
0.602884
-0.909386
0.122053
-0.157924
0.531936
0.157839
-0.751999
0.854636
0.368645
-0.557211
0.660502
-0.901322
-0.0200256
-0.391791
-0.069437
-0.89289
0.865268
0.161229
0.000876425
-0.0245183
-0.558491
-0.828945
-0.00928309
0.175696
-0.911287
0.542325
0.564618
-0.948893
0.125917
-0.762711
0.138241
-0.870544
0.499371
-0.609774
0.192781
0.564595
-0.762061
0.367774
-0.738325
0.0909632
-0.561708
-0.871763
0.521485
-0.936202
-0.370189
0.905604
-0.778839
-0.84936
0.144764
-0.378375
0.57641
0.620332
0.964006
0.274087
-0.427065
-0.0156478
0.241942
0.363629
0.811847
0.172514
-0.949009
0.169756
0.197033
-0.153369
0.843997
-0.227238
-0.839471
-0.440198
-0.150535
-0.597773
0.921609
0.292176
0.929717
-0.106444
0.0296876
-0.272357
-0.732066
0.538913
0.0627604
0.0610708
-0.0994726
-0.706883
0.00725769
0.131004
0.556472
0.667303
0.475202
0.0837133
0.626178
0.129766
0.739819
0.516899
0.305384
-0.326047
0.0228379
-0.923138
-0.102369
0.116934
0.90878
-0.669834
-0.638277
-0.693411
-0.795786
0.878728
-0.197974
-0.38572
0.0721355
-0.338845
-0.00595647
0.672201
-0.886947
0.383517
-0.456481
-0.912731
0.214113
0.895399
-0.71512
0.482237
0.0837419
0.96756
-0.956113
0.0329094
0.0992774
0.334992
-0.106439
-0.3791
0.0965365
-0.305081
-0.866866
-0.643825
0.547203
-0.356664
-0.108059
0.579563
-0.801135
-0.951271
0.0497148
0.590895
-0.608405
-0.0953715
0.893656
0.888666
0.168692
0.244291
-0.946291
0.765691
0.207533
-0.852247
0.340494
-0.927586
-0.771709
0.437757
0.288387
-0.291526
-0.566922
-0.883267
-0.0337298
-0.27472
0.349184
0.254861
-0.727398
0.252944
-0.925122
0.337045
-0.229024
0.123707
-0.0312412
0.708857
0.0178714
-0.919681
0.304113
-0.143255
-0.620858
-0.868564
-0.517742
0.544892
0.374302
-0.283598
-0.219365
-0.983191
-0.258552
0.722929
0.330023
-0.985062
-0.97116
-0.572372
0.830529
-0.987806
-0.976236
-0.439911
0.906273
0.838071
0.262159
0.146785
-0.982259
0.0520108
0.823933
-0.862116
-0.919651
0.0434724
-0.711561
-0.0414469
0.648759
0.651041
-0.2721
0.48819
-0.81337
0.666873
0.0741578
-0.0405037
0.225165
-0.0245518
0.749143
0.653674
0.495951
0.665608
-0.615512
0.325668
0.754751
-0.359233
0.81523
0.607239
0.238149
-0.859224
0.0281499
0.485671
0.561152
-0.763075
-0.305881
0.961676
0.604376
0.0340779
-0.418088
-0.280858
0.499294
-0.251472
0.753421
0.0702119
-0.0573404
0.686321
0.291649
0.11183
0.849839
0.28964
0.592658
0.810846
0.226156
-0.0643417
0.57089
0.0949001
-0.277211
-0.00357797
-0.907836
0.371825
0.848146
-0.90647
-0.942157
-0.854252
-0.900745
-0.901667
0.57282
0.0297789
0.942212
0.0483639
0.664078
-0.675035
-0.893462
0.509146
-0.622794
0.883626
-0.88631
-0.781987
-0.973676
-0.754066
-0.893826
0.70484
0.501921
-0.950379
-0.868775
-0.817413
-0.222348
0.267982
0.476554
0.888665
0.189048
0.934008
-0.559801
-0.821514
-0.0370815
-0.986328
0.425084
-0.457547
0.0385641
-0.921822
0.000267842
-0.757289
-0.558467
0.961638
0.0638926
-0.780101
-0.974055
0.56537
0.53182
-0.98256
0.650246
0.926002
-0.128724
-0.715505
-0.697414
0.147118
-0.463742
-0.930309
-0.877553
0.265861
0.569499
-0.561441
-0.25293
0.458204
0.741431
-0.929768
-0.176934
0.681481
0.81324
-0.142098
-0.159429
-0.0632448
-0.352343
0.316052
0.185269
-0.145455
0.192425
0.482081
-0.458821
-0.577818
-0.574935
-0.221692
-0.910961
0.486713
0.0280073
-0.913943
0.928223
-0.870808
-0.18664
0.586009
0.488963
-0.669093
-0.922228
0.462392
-0.62171
-0.86064
0.592985
-0.178239
0.451495
0.381382
-0.108087
-0.482969
0.686277
-0.923878
0.64871
-0.918309
-0.937535
-0.323102
-0.805154
0.0595567
0.845791
-0.31586
-0.187282
-0.89449
0.660365
0.0682458
0.311725
-0.966192
-0.20682
-0.00173497
-0.781465
-0.991925
0.623015
0.38592
0.0716971
-0.940049
0.819249
-0.644725
-0.919272
-0.540079
0.396793
-0.494238
-0.529082
0.75315
0.829657
0.57545
0.624252
-0.702454
-0.76736
0.950994
-0.612622
-0.9878
-0.951962
0.382349
-0.694674
-0.973989
0.596403
0.545657
-0.894436
0.396689
0.550292
-0.856783
-0.905425
-0.150912
0.442693
-0.0227995
0.728271
0.186694
-0.712674
0.311311
0.753096
-0.00940094
-0.513002
0.907769
-0.733888
0.749671
0.187322
-0.868361
0.747209
-0.600898
0.551548
-0.837083
0.446731
-0.831564
0.471239
0.125329
0.273796
-0.449916
-0.827714
-0.853471
-0.308816
-0.849647
0.1413
-0.860733
0.312549
0.799596
-0.662169
0.721407
0.362639
-0.888769
-0.372971
-0.149512
0.910554
-0.932306
0.537553
-0.108168
-0.766234
-0.32299
-0.963203
-0.831989
-0.791768
-0.0124399
0.455484
0.555861
-0.456075
0.790255
-0.607145
0.855372
0.46679
-0.748789
-0.880223
-0.626261
0.884352
0.696647
0.97623
0.590333
-0.328741
-0.255845
-0.521577
-0.23431
-0.242189
-0.387843
0.502619
0.7368
0.0547533
-0.365707
0.303506
0.0815488
-0.0834187
0.839388
0.43512
0.885729
0.632904
0.824767
0.190066
0.437056
0.461736
-0.709902
-0.330637
-0.630191
-0.182871
0.956683
0.919253
0.747401
0.480912
0.541891
0.637575
0.229144
0.369078
0.36227
0.923971
-0.222847
-0.283693
-0.190103
-0.561713
0.323597
-0.0490487
0.44195
0.688283
0.855154
0.769496
0.34954
0.174237
0.515053
0.0857878
0.437185
-0.278642
0.477786
-0.673877
0.666551
0.594079
0.240562
0.315759
0.6188
0.344796
0.827962
-0.734166
0.507322
-0.514253
0.53281
0.594743
-0.618368
-0.0355868
-0.346057
0.382266
-0.978866
0.207801
0.521737
-0.338748
0.937788
0.604643
0.643352
0.3583
0.720599
0.775319
0.686891
-0.0427103
0.445778
0.926728
0.916937
0.934598
0.0894547
0.669525
-0.843294
-0.913087
0.185029
-0.146068
-0.361058
-0.242454
0.411182
0.453717
-0.895114
0.471932
-0.0326342
-0.761751
-0.656877
-0.361593
0.093744
0.305415
0.532628
0.74909
0.177403
-0.099381
0.655633
0.575393
0.835405
0.648112
0.279671
0.0904752
0.167499
0.458438
-0.872415
-0.449276
0.355013
-0.364034
0.59467
0.832753
-0.0594388
-0.128476
0.0138057
0.319194
0.348588
0.218188
0.561569
0.346866
0.854512
-0.967667
-0.902137
0.156436
0.0101743
0.772569
0.287408
-0.0378834
0.0465221
0.490012
-0.418199
0.826978
0.127205
0.439849
0.913948
0.811929
0.586106
0.517901
0.267813
0.600698
-0.00122985
0.725267
-0.841286
0.312147
0.834095
0.909314
0.0670408
-0.955708
0.260088
0.727346
-0.381055
-0.871712
0.989619
-0.97451
-0.401166
0.199342
-0.0579528
-0.053886
0.73108
-0.569267
0.0499792
0.800996
-0.473658
0.689567
-0.508534
-0.787941
-0.448458
0.324628
-0.0859
-0.542625
0.525697
0.145382
0.793738
-0.92001
0.578436
-0.318006
-0.428111
0.12072
0.175905
0.208509
-0.881809
-0.82431
-0.0892504
-0.915086

## Sheet: No down FM
Opto no DFM	Endo no DFM
0.818901	-0.883675
-0.249555	-0.226872
0.527569	-0.529013
0.0925975	0.948643
-0.908032	-0.255208
0.553748	-0.795599
0.764582	0.205629
-0.799651	-0.69819
-0.37952	0.695215
-0.706074	0.697436
0.91006	0.292022
0.923302	-0.592488
0.711083	-0.776422
-0.974813	-0.709222
-0.407224	-0.982556
0.749002	0.398782
0.284151	-0.841218
0.653342	-0.965399
0.884799	-0.697862
0.12756	-0.645215
0.519121	-0.80524
0.33184	-0.959155
0.795744	-0.664638
0.196722	0.945273
-0.809455	-0.96575
0.913388	-0.5495
0.916579	0.433276
0.903262	-0.914265
0.739277	0.511745
0.682347	0.467023
0.581705	-0.889042
0.863526	0.926651
0.932731	-0.731395
0.871893	0.228209
0.78929	-0.982763
-0.657813	-0.984114
0.832219	-0.960875
0.540956	-0.53932
-0.536633	0.596246
-0.854585	0.86369
-0.856765	0.850475
-0.789621	0.0872519
-0.0161204	-0.913257
-0.299748	0.784066
0.873354	-0.804219
-0.560918	0.6183
-0.715153	-0.925305
0.00688976	-0.252884
0.193361	0.935649
-0.806397	-0.948142
-0.603032	-0.834378
-0.888455	-0.711968
0.967519	-0.0505168
0.846284	-0.747181
0.965055	0.511233
0.795455	-0.204527
0.905899	-0.304006
0.236863	0.347992
0.401917	0.784601
-0.335817	-0.417857
0.879398	-0.382514
-0.373867	-0.410981
-0.006508	0.447024
-0.238513	0.427433
-0.899633	-0.777467
-0.187769	0.531111
0.194266	-0.92091
-0.28725	-0.0619207
0.438789	0.659279
0.383836	0.716384
0.22133	0.32856
0.314733	-0.0809939
0.364417	0.772077
-0.0928109	0.708343
-0.0311578	-0.0175817
0.386526	0.670587
0.279925	0.0769277
0.499877	0.07275
0.837034	0.0705909
0.3363	0.291839
-0.546238	0.323471
0.63526	-0.77765
-0.560132	0.733443
0.668831	0.702106
0.588221	-0.636428
0.50511	0.171135
-0.43714	0.547062
0.802929	0.503872
0.182542	0.436989
0.748815	-0.0256945
-0.967925	-0.192321
0.659573	0.42812
-0.594856	-0.828544
0.899367	-0.104527
0.936188	-0.360216
-0.923294	-0.193258
-0.0840925	-0.783386
0.830153	0.182499
-0.362877	-0.256335
0.877826	-0.653654
0.620338	-0.249047
0.414763	0.409094
-0.833084	0.443687
0.922682	0.843685
-0.581903	0.0292325
-0.52366	-0.935886
-0.435648	-0.914104
0.28025	-0.411197
0.881909	0.691035
0.251075	0.701278
0.16725	-0.956228
-0.519138	0.564956
-0.822259	-0.656987
0.84915	-0.979149
0.516949	-0.501753
0.374148	-0.97847
0.994804	0.818044
0.69583	0.494859
0.813056	0.0710786
-0.537402	-0.554269
0.663198	-0.937355
-0.109248	-0.686018
-0.0786561	-0.867061
-0.817791	-0.494445
-0.114757	-0.735843
-0.32453	-0.479371
0.0219887	0.320534
0	-0.919258
-0.682079	-0.556052
0.691696	0.442173
0.60228	-0.97371
0.891121	0.454816
0.615393	0.532567
-0.909754	-0.269247
-0.750049	-0.980821
-0.481314	-0.242977
0.733174	-0.845217
0.479449	0.741272
0.711003	-0.904432
0.548024	0.57739
-0.189843	-0.686479
0.695036	-0.955592
0.735621	0.947633
	-0.706225
	0.508644
	0.240442
	-0.00741476
	-0.756075
	0.236135
	0.61133
	-0.565888
	-0.885046
	-0.907141
	-0.750255
	-0.798522
	-0.838611
	0.164971
	-0.0762661
	-0.924591
	-0.158426
	0.0883526
	-0.0381113
	-0.986814
	0.473947
	-0.830878
	-0.495474
	-0.245054
	0.927762
	-0.845742
	-0.602651
	-0.68069
	-0.911965
	-0.945014
	-0.0324379
	-0.895381
	0.0699574
	0.0930575
	-0.961359
	0.54062
	-0.109626
	-0.865319
	0.0363982
	-0.114198
	-0.925656
	0.517175
	0.558189
	-0.876149
	-0.147649
	-0.838996
	-0.651178
	0.149088
	-0.964432
	-0.518138
	-0.155799
	-0.93296
	-0.150238
	-0.797946
	0.399426
	-0.671165
	-0.217331
	-0.74623
	0.298272
	-0.0604201
	0.609149
	-0.790048
	-0.399438
	-0.933087
	-0.965136
	-0.995856
	0.553667
	-0.990105
	0.20762
	-0.979786
	-0.923014
	-0.600897
	0.354305
	-0.618032
	-0.79578
	0.990019
	0.800669
	-0.657104
	-0.879349
	0.955357
	-0.904131
	-0.964665
	-0.889873
	-0.874917
	-0.986435
	0.578533
	-0.951768
	-0.929333
	-0.969236
	-0.955384
	-0.602279
	-0.223118
	-0.851538
	-0.948334
	-0.776919
	-0.967081
	-0.974244
	-0.928457
	-0.936726
	0.0857981
	-0.939499
	-0.518236
	0.271425
	-0.889513
	-0.927407
	-0.505117
	-0.961031
	-0.987524
	-0.694937
	-0.895412
	0.0458607
	-0.276146
	-0.622272
	0.531619
	-0.0986175
	-0.802031
	-0.95711
	-0.827446
	-0.974687
	-0.0402937
	-0.893362
	-0.965101
	-0.981206
	-0.946843
	-0.582659
	-0.979877
	-0.11634
	-0.962554
	-0.971527
	-0.971598
	-0.972796
	-0.949816
	-0.886837
	-0.56506
	-0.577727
	-0.952334
	-0.849082
	-0.879506
	-0.687598
	-0.976301
	-0.912157
	-0.974246
	0.774107
	-0.394142
	-0.836286
	-0.945738
	-0.971952
	-0.994676
	-0.843071
	-0.790826
	-0.988845
	-0.34389
	-0.752981
	-0.948079
	-0.91083
	-0.767265
	-0.406071
	-0.732995
	0.161453
	-0.979
	0.512103
	-0.979881
	-0.952485
	-0.308209
	-0.428395
	-0.0604882
	0.0451532
	-0.65641
	-0.298507
	-0.985989
	-0.562328
	-0.432894
	-0.98712
	-0.982201
	-0.947769
	-0.247712
	-0.919336
	0.739039
	0.148372
	-0.828755
	-0.571473
	0.805921
	0.677107
	-0.57085
	-0.950573
	0.88512
	-0.463283
	-0.952307
	0.765403
	0.50339
	-0.876973
	0.571585
	0.758084
	-0.271512
	0.352458
	-0.216665
	-0.296046
	-0.966144
	-0.965561
	0.608
	0.651661
	-0.97883
	0.808477
	0.427277
	0.755351
	-0.630528
	-0.855124
	0.964355
	-0.654482
	-0.0694084
	-0.933988
	0.221841
	0.245747
	-0.504894
	-0.1389
	-0.497988
	-0.446593
	-0.839363
	-0.0779672
	0.0917734
	-0.464581
	-0.0325854
	-0.505773
	0.0117334
	-0.285525
	-0.977746
	-0.935989
	-0.943714
	-0.928775
	-0.959762
	-0.268986
	-0.6609
	-0.543095
	-0.510286
	-0.249801
	-0.972614
	0.149681
	0.507522
	-0.323977
	-0.158029
	0.604782
	-0.643699
	-0.85095
	0.447146
	-0.477657
	-0.870094
	-0.774685
	-0.227002
	-0.438557
	0.590867
	-0.804778
	0.280817
	-0.909386
	0.122053
	0.531936
	-0.751999
	-0.901322
	-0.89289
	-0.558491
	-0.828945
	-0.762711
	-0.609774
	0.564595
	0.0909632
	-0.370189
	-0.84936
	0.57641
	0.274087
	-0.427065
	0.172514
	-0.949009
	-0.272357
	-0.732066
	-0.0994726
	-0.706883
	0.667303
	-0.669834
	-0.693411
	-0.886947
	0.383517
	-0.956113
	-0.356664
	-0.801135
	-0.951271
	0.168692
	-0.852247
	-0.927586
	-0.291526
	-0.727398
	-0.919681
	-0.620858
	-0.868564
	-0.517742
	-0.983191
	0.330023
	-0.985062
	-0.97116
	-0.987806
	-0.976236
	-0.439911
	0.146785
	-0.982259
	0.823933
	-0.0414469
	0.651041
	-0.0405037
	-0.251472
	-0.907836
	-0.854252
	-0.900745
	0.0297789
	0.942212
	0.0483639
	0.664078
	-0.675035
	-0.893462
	-0.88631
	-0.781987
	-0.973676
	-0.754066
	-0.893826
	0.501921
	-0.950379
	-0.868775
	-0.817413
	0.267982
	0.888665
	-0.0370815
	-0.986328
	0.425084
	-0.457547
	-0.921822
	-0.757289
	-0.780101
	-0.974055
	0.56537
	0.53182
	-0.98256
	-0.715505
	-0.697414
	0.147118
	-0.930309
	-0.877553
	-0.25293
	0.458204
	0.741431
	0.81324
	-0.574935
	-0.910961
	-0.913943
	-0.870808
	-0.669093
	-0.922228
	-0.62171
	-0.86064
	0.592985
	-0.178239
	-0.482969
	-0.89449
	-0.966192
	-0.781465
	-0.991925
	-0.644725
	-0.702454
	-0.612622
	-0.9878
	0.382349
	-0.856783
	-0.733888
	-0.600898
	-0.831564
	-0.849647
	-0.662169
	-0.888769
	-0.108168
	-0.766234
	-0.32299
	-0.963203
	-0.831989
	-0.626261
	0.97623
	-0.328741
	-0.242189
	-0.387843
	0.7368
	-0.365707
	0.839388
	0.43512
	0.885729
	0.632904
	0.824767
	0.190066
	0.437056
	0.461736
	-0.630191
	-0.182871
	0.369078
	-0.190103
	-0.561713
	-0.0490487
	0.688283
	0.855154
	0.769496
	-0.278642
	0.594079
	-0.734166
	-0.514253
	0.207801
	0.521737
	-0.338748
	0.937788
	0.916937
	0.934598
	-0.913087
	0.185029
	-0.242454
	0.411182
	-0.895114
	0.471932
	-0.761751
	-0.361593
	0.532628
	0.177403
	-0.099381
	-0.872415
	-0.449276
	-0.364034
	-0.967667
	-0.902137
	0.772569
	-0.0378834
	-0.418199
	0.517901
	-0.841286
	-0.381055
	-0.871712
	-0.97451
	-0.401166
	0.73108
	-0.569267
	0.0499792
	-0.787941
	0.525697
	0.793738
	0.175905
	-0.915086
	0.30495
	0.0407225
	0.542898
	0.668082
	0.801016
	0.728212
	0.823432
	-0.597391
	0.111846
	0.822808
	0.75452
	0.512537
	0.830847
	0.0149856
	-0.472674
	-0.66259
	-0.0633762
	0.00412263
	0.23022
	0.821735
	0.803048
	0.402927
	0.531774
	-0.0390635
	0.616736
	0.136581
	0.460389
	-0.0592176
	-0.0954881
	0.811171
	0.253057
	-0.576022
	-0.399013
	0.58195
	0.445974
	0.516412
	-0.0130862
	0.188664
	0.605787
	-0.111529
	0.26123
	0.584233
	0.146678
	0.876755
	0.605723
	0.709624
	0.398735
	0.661686
	0.954342
	0.913385
	0.799298
	-0.475165
	-0.00184608
	0.942336
	0.907109
	-0.542966
	0.519752
	0.538641
	0.721747
	-0.247373
	-0.609236
	0.40741
	0.832203
	-0.431508
	-0.357759
	0.0252782
	-0.400993
	0.231888
	0.353567
	-0.138044
	0.150059
	0.431822
	0.117981
	-0.438227
	0.795695
	0.487072
	0.362366
	0.497455
	0.426459
	-0.153904
	0.509794
	0.698808
	0.31648
	0.428667
	0.381197
	0.621613
	0.65513
	0.642436
	0.292687
	0.665004
	0.795939
	0.76408
	-0.939289
	0.494383
	0.358874
	0.70787
	0.796723
	0.256226
	-0.696101
	0.108646
	-0.15835
	0.643294
	-0.323665
	0.402528
	0.387638
	0.152224
	-0.0258226
	0.319438
	0.563784
	0.0765676
	0.000838772
	0.542343
	0.242793
	-0.109042
	0.547146
	-0.39092
	-0.075367
	0.254192
	0.590764
	0.110181
	-0.405381
	-0.0485195
	0.831461
	-0.282562
	0.352486
	0.0637421
	-0.197691
	-0.340429
	0.798958
	0.140812
	0.308604
	-0.2113
	0.22131
	0.814531
	0.277855
	0.243871
	0.293171
	0.194748
	-0.528004
	-0.397079
	-0.115416
	0.541327
	-0.294823
	0.232407
	-0.13331
	-0.213053
	0.440155
	-0.0712576
	-0.539362
	0.325104
	-0.460881
	0.122286
	-0.127
	-0.499622
	0.281204
	0.674225
	0.326932
	-0.388372
	-0.148897
	0.128958
	-0.382243
	0.142727
	-0.152531
	0.307643
	-0.616581
	0.538467
	0.113722
	-0.0246276
	-0.144809
	-0.411794
	0.2181
	-0.541401
	-0.155837
	0.78529
	-0.388417
	0.748568
	0.434441
	0.627585
	0.288112
	0.0706458
	0.178847
	0.575957
	-0.00300942
	0.602884
	-0.157924
	0.157839
	0.368645
	-0.557211
	-0.0200256
	-0.391791
	-0.069437
	0.161229
	0.175696
	0.542325
	0.564618
	0.125917
	0.138241
	0.192781
	0.367774
	-0.378375
	0.921609
	0.929717
	-0.106444
	0.0627604
	0.739819
	0.516899
	0.305384
	0.482237
	0.0965365
	0.590895
	0.893656
	-0.0337298
	0.349184
	0.252944
	0.337045
	0.0178714
	0.374302
	-0.283598
	-0.258552
	-0.572372
	0.830529
	0.906273
	0.838071
	0.48819
	0.653674
	0.495951
	0.665608
	0.81523
	0.607239
	0.561152
	0.604376
	0.0340779
	-0.418088
	-0.280858
	0.499294
	-0.0573404
	0.686321
	0.291649
	0.11183
	0.28964
	0.592658
	0.810846
	0.226156
	0.57089
	-0.277211
	0.0638926
	0.650246
	0.681481
	-0.159429
	0.316052
	-0.18664
	0.462392
	0.686277
	0.64871
	0.0595567
	0.845791
	0.660365
	-0.00173497
	0.623015
	0.38592
	0.624252
	0.545657
	0.550292
	-0.150912
	0.728271
	0.311311
	0.187322
	0.551548
	0.446731
	-0.449916
	0.312549
	0.790255
	-0.23431
	0.502619
	0.919253
	0.323597
	0.477786
	0.666551
	0.240562
	0.6188
	-0.618368
	0.382266
	0.720599
	-0.0427103
	0.0894547
	0.832753
	0.854512
	0.156436
	0.826978
	0.127205
	0.267813
	-0.00122985
	0.0670408
	0.565715
	0.313855
	-0.621706
	-0.115139
	-0.245203
	0.468138
	0.837354
	-0.931669
	0.162552
	-0.364396
	0.120681
	-0.761521
	-0.20344
	0.16936
	-0.3683
	-0.798547
	0.883855
	0.561536
	0.258176
	0.331445
	-0.823175
	-0.780149
	-0.35576
	0.662453
	-0.892162
	0.0851331
	-0.0813741
	-0.163771
	-0.714461
	-0.844061
	0.672986
	0.957107
	-0.041666
	0.243652
	0.814784
	-0.651848
	-0.768188
	-0.741193
	-0.253892
	-0.620879
	0.806619
	0.391425
	-0.273393
	-0.550968
	-0.784479
	-0.67954
	-0.890893
	-0.782118
	-0.365167
	-0.485477
	0.345953
	0.39454
	0.581142
	0.478941
	-0.695173
	-0.3227
	0.869136
	-0.961799
	0.675404
	-0.913032
	0.703024
	0.503671
	0.729574
	-0.387411
	-0.4822
	-0.845212
	-0.554379
	-0.832265
	-0.523042
	-0.787382
	-0.151409
	0.373357
	-0.105253
	0.834431
	-0.91772
	-0.148393
	0.848237
	-0.967415
	0.691745
	0.747704
	0.838524
	0.0118515
	0.820599
	0.777395
	-0.896933
	0.765127
	-0.959098
	0.840346
	0.904994
	0.419426
	-0.862124
	-0.420813
	-0.959226
	-0.673495
	0.386158
	-0.343851
	-0.921182
	0.573586
	-0.598576
	0.672304
	-0.815221
	-0.16621
	-0.342221
	-0.746166
	0.275386
	-0.22069
	-0.187376
	-0.516823
	0.113556
	0.725297
	0.608415
	-0.0442872
	0.680769
	-0.428295
	-0.375897
	-0.141884
	0.661604
	0.585224
	0.81748
	-0.497384
	0.354579
	-0.653175
	-0.519334
	0.711885
	0.756242
	0.663543
	-0.759216
	0.790671
	0.651761
	-0.183515
	0.600286
	0.840267
	0.495809
	0.833455
	0.240787
	-0.444891
	0.803734
	0.757199
	-0.428079
	0.673928
	0.807656
	-0.517764
	-0.930667
	-0.0756318
	-0.708973
	0.861976
	-0.0102373
	-0.172246
	0.250312
	-0.824702
	-0.775377
	-0.201709
	-0.610991
	-0.875137
	-0.922966
	-0.878874
	-0.894288
	-0.063553
	-0.400857
	-0.854863
	0.491249
	0.227042
	0.734911
	-0.95725
	-0.567414
	-0.368328
	-0.0303011
	0.79103
	0.539645
	0.536608
	-0.844872
	-0.962097
	-0.903762
	-0.505724
	-0.62975
	-0.522699
	-0.811068
	0.028165
	-0.0501979
	-0.823484
	0.740607
	-0.740602
	0.856245
	0.786122
	0.89632
	0.732183
	-0.791043
	-0.939826
	0.936994
	-0.80928
	0.0520506
	0.909353
	0.479716
	-0.0982867
	-0.0750161
	0.121028
	-0.706688
	-0.824891
	0.628914
	-0.405552
	-0.718999
	-0.530928
	-0.886642
	0.154321
	-0.479545
	0.145465
	-0.113225
	0.29715
	-0.20636
	-0.976981
	0.367962
	0.660502
	0.000876425
	-0.0245183
	-0.00928309
	-0.911287
	-0.948893
	0.499371
	-0.738325
	-0.561708
	-0.936202
	0.905604
	-0.778839
	0.620332
	-0.0156478
	0.169756
	-0.153369
	0.843997
	-0.227238
	-0.839471
	-0.440198
	-0.150535
	-0.597773
	0.0296876
	0.90878
	-0.638277
	-0.795786
	-0.338845
	-0.00595647
	0.672201
	0.895399
	-0.3791
	0.244291
	0.340494
	-0.771709
	0.437757
	-0.229024
	0.304113
	-0.919651
	-0.81337
	-0.615512
	-0.859224
	0.485671
	-0.00357797
	0.848146
	0.57282
	0.509146
	-0.622794
	0.883626
	-0.222348
	0.934008
	-0.559801
	-0.821514
	0.0385641
	0.926002
	-0.561441
	-0.0632448
	-0.352343
	-0.145455
	0.482081
	-0.458821
	-0.577818
	-0.221692
	0.928223
	0.381382
	-0.323102
	-0.31586
	-0.187282
	0.311725
	-0.940049
	-0.529082
	0.829657
	0.950994
	-0.694674
	-0.905425
	-0.0227995
	-0.712674
	0.753096
	-0.513002
	0.747209
	0.471239
	0.125329
	0.1413
	0.721407
	-0.372971
	0.537553
	0.455484
	-0.456075
	-0.607145
	0.303506
	0.0815488
	0.956683
	0.637575
	0.229144
	-0.283693
	-0.673877
	-0.0355868
	-0.978866
	0.669525
	-0.146068
	-0.656877
	0.74909
	0.655633
	-0.128476
	0.319194
	0.439849
	-0.955708
	-0.0579528
	-0.053886
	0.800996
	-0.473658
	0.689567
	-0.508534
	-0.448458
	0.324628
	-0.0859
	-0.542625
	0.145382
	-0.92001
	0.578436
	-0.318006
	-0.428111
	0.12072
	0.208509
	-0.881809
	-0.82431
	-0.0892504
	0.298887
	0.429935
	0.773222
	-0.979523
	0.151491
	0.576134
	0.889532
	-0.936261
	-0.982323
	0.129923
	-0.495498
	0.818263
	-0.0675044
	-0.453531
	0.944744
	-0.81997
	-0.975436
	0.971956
	-0.0280482
	-0.421712
	-0.925977
	0.443018
	0.919771
	0.0494223
	-0.442802
	0.992073
	0.932355
	-0.806771
	0.108075
	-0.0116449
	0.957619
	-0.609159
	0.888028
	0.878571
	0.82066
	-0.0340933
	0.82985
	0.720705
	-0.941145
	-0.905288
	-0.617361
	0.720016
	-0.605982
	0.860368
	0.742552
	-0.918416
	0.675586
	0.87899
	0.135627
	-0.495542
	-0.97254
	0.929278
	-0.85773
	-0.714052
	0.787204
	-0.891196
	0.783965
	-0.525461
	-0.892384
	-0.947669
	0.783367
	-0.502065
	-0.939937
	0.991399
	-0.643939
	-0.3763
	-0.945086
	-0.952878
	-0.059712
	-0.75541
	-0.767409
	-0.1356
	0.567802
	0.800357
	0.144369
	-0.445656
	0.800175
	0.940661
	-0.160547
	-0.961502
	0.497968
	-0.806097
	0.590334
	0.00904041
	0.860895
	0.856757
	-0.842457
	-0.71024
	0.692836
	-0.972257
	-0.96947
	-0.941438
	-0.958951
	0.30207
	-0.898473
	-0.824295
	0.951141
	0.689384
	-0.938174
	-0.931034
	-0.723974
	0.640059
	0.808333
	-0.691835
	-0.74973
	-0.0544884
	-0.90684
	-0.616713
	0.221915
	0.68641
	-0.870544
	-0.762061
	-0.871763
	0.521485
	0.964006
	-0.923138
	-0.197974
	-0.456481
	-0.912731
	0.214113
	-0.71512
	-0.305081
	-0.643825
	-0.608405
	0.888666
	-0.946291
	0.765691
	-0.925122
	0.708857
	-0.862116
	-0.2721
	0.749143
	0.238149
	0.961676
	-0.0643417
	0.371825
	-0.90647
	-0.942157
	-0.901667
	-0.463742
	-0.929768
	0.0280073
	-0.937535
	-0.494238
	-0.951962
	-0.973989
	-0.894436
	-0.00940094
	-0.837083
	0.273796
	-0.827714
	-0.853471
	0.799596
	0.362639
	-0.149512
	0.910554
	-0.932306
	-0.791768
	0.855372
	0.46679
	-0.748789
	-0.880223
	0.884352
	-0.709902
	0.923971
	0.44195
	0.926728
	-0.843294
	0.408391
	0.731612
	0.1483
	0.727574
	0.589153
	0.495679
	0.242461
	0.706776
	0.836673
	0.43331
	0.763483
	0.571302
	0.193615
	0.589318
	0.113156
	0.471895
	0.699721
	0.304401
	-0.0289255
	0.116828
	0.386828
	-0.0885623
	0.780782
	-0.0797807
	-0.00602019
	0.449525
	0.312562
	0.856105
	0.146994
	0.347406
	0.0801374
	-0.15332
	-0.277654
	0.603661
	-0.194375
	0.33263
	0.278562
	-0.0705226
	0.253091
	-0.184335
	0.263274
	0.331228
	0.0567491
	0.322295
	0.527826
	0.66418
	0.160198
	-0.469678
	0.712807
	0.109956
	0.2312
	-0.472464
	0.23518
	-0.620011
	0.213808
	-0.339877
	0.12842
	-0.396293
	-0.00860316
	0.0814602
	0.246449
	-0.222059
	0.721034
	0.430723
	-0.605696
	0.334771
	0.479879
	-0.0100376
	0.528233
	0.109452
	0.368316
	0.275282
	-0.115905
	-0.774813
	-0.00874021
	-0.20949
	0.803677
	0.552945
	0.674345
	0.535043
	0.305015
	0.884072
	0.74046
	0.70602
	0.700054
	0.540575
	0.380415
	0.765553
	0.833189
	0.854636
	0.144764
	0.811847
	0.0610708
	0.556472
	0.0837133
	0.626178
	-0.326047
	0.116934
	0.0721355
	0.334992
	-0.106439
	0.547203
	0.579563
	0.288387
	0.544892
	0.722929
	0.0434724
	0.666873
	0.754751
	-0.359233
	0.0281499
	0.70484
	0.476554
	0.189048
	0.000267842
	-0.558467
	-0.176934
	0.486713
	0.586009
	0.488963
	0.451495
	-0.20682
	0.0716971
	0.819249
	0.396793
	0.75315
	0.57545
	0.596403
	0.396689
	-0.308816
	-0.0124399
	0.590333
	0.0547533
	-0.0834187
	-0.330637
	0.34954
	0.0857878
	0.315759
	0.344796
	0.827962
	0.53281
	-0.346057
	0.643352
	0.775319
	0.686891
	-0.361058
	-0.0326342
	0.093744
	0.305415
	0.0904752
	0.59467
	-0.0594388
	0.348588
	0.218188
	0.561569
	0.346866
	0.0101743
	0.287408
	0.913948
	0.811929
	0.586106
	0.600698
	0.725267
	0.312147
	0.199342
	0.433294
	0.2558
	0.661357
	-0.24053
	0.0665523
	-0.0960838
	0.17998
	0.30976
	0.500188
	0.755894
	0.695176
	0.852741
	0.617778
	0.778429
	0.705566
	0.275028
	0.664162
	0.897835
	-0.908469
	0.786665
	0.918212
	0.495356
	0.747577
	-0.501554
	-0.0606877
	0.790544
	0.785065
	0.28651
	0.640168
	0.00382303
	-0.303629
	-0.112992
	0.594528
	0.695906
	0.530454
	0.847449
	0.334519
	-0.184954
	0.950962
	-0.074016
	-0.463277
	0.483788
	0.322973
	0.392127
	-0.0733577
	-0.0183012
	0.0376776
	0.268633
	-0.638966
	-0.0819137
	-0.174406
	0.662332
	0.154343
	-0.194439
	-0.505726
	0.276668
	-0.524663
	-0.0458232
	0.943628
	0.59757
	-0.19008
	0.544025
	0.415442
	0.00654801
	0.437552
	-0.573094
	0.68569
	-0.122286
	0.252189
	0.660709
	-0.340848
	-0.482067
	0.865268
	0.363629
	0.292176
	0.538913
	0.00725769
	0.131004
	-0.102369
	0.96756
	0.254861
	0.123707
	0.262159
	0.0741578
	0.225165
	0.753421
	0.0702119
	0.0949001
	-0.108087
	0.0682458
	-0.540079
	0.575393
	0.648112
	0.0138057
	0.0465221
	0.490012
	0.909314
	0.727346
	0.989619
	0.643827
	-0.00545499
	0.181975
	0.00329787
	0.171094
	-0.245293
	0.00634104
	0.727455
	0.321914
	0.696978
	-0.615202
	-0.301734
	0.419487
	0.259672
	-0.282093
	-0.290888
	0.479411
	0.0919466
	-0.590522
	0.225749
	0.173024
	-0.10418
	0.155052
	-0.0442649
	0.298767
	-0.00443828
	0.65204
	0.157809
	0.356254
	-0.547152
	0.646397
	-0.34461
	0.355469
	-0.165771
	0.292275
	0.364717
	0.47345
	-0.629533
	-0.242798
	0.197033
	0.475202
	0.129766
	0.0837419
	0.207533
	-0.27472
	0.0520108
	-0.711561
	0.648759
	-0.0245518
	0.325668
	-0.763075
	-0.128724
	-0.142098
	0.185269
	0.442693
	0.749671
	-0.255845
	-0.521577
	0.36227
	0.835405
	0.458438
	0.179588
	0.718019
	0.224042
	0.46699
	-0.652216
	0.543964
	-0.0301233
	0.221549
	-0.432379
	-0.501775
	0.0686342
	0.212823
	0.454835
	-0.136544
	0.2667
	-0.0341955
	0.406106
	0.0495372
	0.441383
	-0.936705
	-0.417456
	0.321902
	0.268081
	0.0930997
	0.240199
	0.0832977
	-0.0545504
	-0.602379
	0.275568
	-0.272055
	0.341443
	0.262958
	0.140426
	0.00300373
	0.196461
	0.241942
	0.0329094
	-0.108059
	-0.566922
	-0.0312412
	-0.305881
	0.186694
	0.747401
	0.480912
	0.541891
	-0.222847
	0.174237
	0.515053
	0.507322
	0.594743
	0.604643
	0.3583
	0.445778
	0.453717
	0.279671
	0.167499
	0.355013
	0.260088
	-0.853841
	-0.248654
	0.0450828
	-0.932448
	-0.916665
	-0.614355
	-0.45794
	-0.883539
	-0.0328209
	0.0903823
	0.0172772
	-0.298092
	-0.662045
	0.341905
	0.156624
	-0.71174
	-0.518595
	-0.789538
	-0.212712
	-0.495279
	0.344081
	0.366415
	-0.701958
	0.19906
	0.0228379
	-0.38572
	-0.866866
	0.0497148
	-0.0953715
	-0.883267
	-0.923878
	-0.918309
	-0.805154
	-0.919272
	-0.76736
	0.907769
	-0.868361
	0.555861
	0.696647
	0.437185
